# Supplementary material for: Metal-free construction of primary sulfonamides through three diverse salts
Source: Royal Society of Chemistry journal article supplement (doi:10.1039/c8gc03014f), 2018-01-01

# Metal-Free Construction of Primary Sulfonamide through Three Diverse Salts

Ming Wang, Qiaoling Fan, and Xuefeng Jiang\*

Shanghai Key Laboratory of Green Chemistry and Chemical Process, School of Chemistry and  
Molecular Engineering, East China Normal University, 3663 North Zhongshan Road, Shanghai 200062,  
P. R. China

E-mail: xfjiang@chem.ecnu.edu.cn

## Supporting Information

### Table of Contents

|                                                                     |     |
|---------------------------------------------------------------------|-----|
| <b>I. General Information</b> .....                                 | S2  |
| <b>II. General procedure for the sulfonamide synthesis</b> .....    | S2  |
| <b>III. Characterization of sulfonamide products</b> .....          | S3  |
| <b>IV. The <sup>31</sup>P NMR in different reaction times</b> ..... | S19 |
| <b>V. The kinetic studies</b> .....                                 | S20 |
| <b>VI. X-Ray crystal structures</b> .....                           | S24 |
| <b>X. References</b> .....                                          | S25 |
| <b>XI. NMR spectra</b> .....                                        | S26 |

## I. General Information.

$^1\text{H}$  and  $^{13}\text{C}$  NMR spectra were recorded on 400 MHz NMR spectrometers (Bruker AVANCE) using  $\text{CDCl}_3$ . Chemical shifts are reported in parts per million (ppm). Chemical shifts for protons are reported in parts per million relative to chloroform, dichloromethane or DMSO ( $\text{CHCl}_3$   $\delta$  7.26,  $(\text{CH}_3)_2\text{CO}$   $\delta$  2.05, DMSO  $\delta$  2.50). Chemical shifts for carbon are reported in parts per million relative to chloroform, dichloromethane or DMSO ( $\text{CHCl}_3$   $\delta$  77.0,  $(\text{CH}_3)_2\text{CO}$   $\delta$  29.84, DMSO  $\delta$  39.52). Data are represented as follows: chemical shift, multiplicity (br = broad, s = singlet, d = doublet, t = triplet, q = quartet, m = multiplet), coupling constants in Hertz (Hz), integration. Mass spectra were recorded on a Shimadzu GCMS-QP2010 Ultra. IR spectra were recorded on TENSOR (27) Series FT-IR 241.Spectrometers. aryldiazonium salts **1** were prepared adopting reported procedures from corresponding aryl amines.<sup>1</sup>

## II. General procedure for the sulfonamide synthesis

Under a  $\text{N}_2$  atmosphere, aryldiazonium salts **1a** (257.4 mg, 1.25 mmol),  $\text{NaN}_3$  (32.5 mg, 0.5 mmol),  $\text{PPh}_3$  (157.4 mg, 0.6 mmol),  $\text{Na}_2\text{S}_2\text{O}_5$  (190.1 mg, 1.0 mmol), TBAB (241.7 mg, 0.75 mmol) and  $\text{MeCN}/\text{H}_2\text{O} = 1/2$  (1 mL), the reaction was stirred at 80 °C for 12 h, and water (5 mL) was added. The solution was extracted with ethyl acetate and organic layers were combined, dried over sodium sulfate. After evaporation of solvent, the residue was purified by column chromatography to give the corresponding products **2** or **3**.

### III. Characterization of sulfonamide products

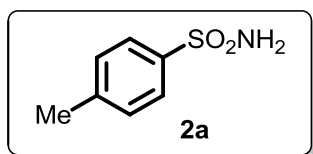

**4-Methylbenzenesulfonamide (2a):** Prepared following general procedure using aryldiazonium salts **1a** (257.4 mg, 1.25 mmol), NaN<sub>3</sub> (32.5 mg, 0.5 mmol), PPh<sub>3</sub> (157.4 mg, 0.6 mmol), Na<sub>2</sub>S<sub>2</sub>O<sub>5</sub> (190.1 mg, 1.0 mmol), TBAB (241.7 mg, 0.75 mmol) and MeCN/H<sub>2</sub>O = 1/2 (1 mL), the reaction was stirred at 80 °C for 12 h giving **2a** in 90% yield as a white solid by column chromatography (PE/EA = 5/1 to 2/1). <sup>1</sup>H NMR (400 MHz, *d*<sub>6</sub>-DMSO) δ 7.71 (d, *J* = 8.2 Hz, 2H), 7.36 (d, *J* = 8.1 Hz, 2H), 7.27 (s, 2H), 2.37 (s, 3H); <sup>13</sup>C NMR (100 MHz, *d*<sub>6</sub>-DMSO) δ 141.8, 141.4, 129.3, 125.6, 20.9; IR (KBr) ν 3348, 3270, 1598, 1500, 1309, 1175, 1021, 917, 835, 669 cm<sup>-1</sup>; HRMS (EI) for C<sub>7</sub>H<sub>9</sub>NO<sub>2</sub>S Calculated: 171.0354, found: 171.0353.

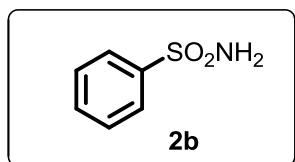

**Benzenesulfonamide (2b).** Prepared following general procedure using aryldiazonium salts **1b** (239.9 mg, 1.25 mmol), NaN<sub>3</sub> (32.5 mg, 0.5 mmol), PPh<sub>3</sub> (157.4 mg, 0.6 mmol), Na<sub>2</sub>S<sub>2</sub>O<sub>5</sub> (190.1 mg, 1.0 mmol), TBAB (241.7 mg, 0.75 mmol) and MeCN/H<sub>2</sub>O = 1/2 (1 mL), the reaction was stirred at 80 °C for 12 h giving **2b** in 72% yield as a white solid by column chromatography (PE/EA = 5/1 to 2/1). <sup>1</sup>H NMR (400 MHz, *d*<sub>6</sub>-acetone) δ 7.91 (d, *J* = 7.0 Hz, 2H), 7.72 – 7.43 (m, 3H), 6.59 (s, 2H); <sup>13</sup>C NMR (100 MHz, *d*<sub>6</sub>-acetone) δ 145.0, 132.8, 129.7, 126.8; IR (KBr) ν 3353, 3258, 1448, 1344, 1160, 1091, 756, 688, 537 cm<sup>-1</sup>; HRMS (EI) for C<sub>6</sub>H<sub>7</sub>NO<sub>2</sub>S Calculated: 157.0197, found: 157.0200.

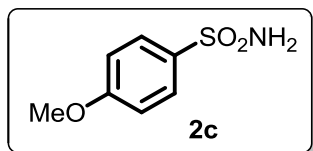

**4-Methoxybenzenesulfonamide (2c).** Prepared following general procedure using aryldiazonium salts **1c** (277.4 mg, 1.25 mmol), NaN<sub>3</sub> (32.5 mg, 0.5 mmol), PPh<sub>3</sub> (157.4 mg, 0.6 mmol), Na<sub>2</sub>S<sub>2</sub>O<sub>5</sub> (190.1 mg, 1.0 mmol), TBAB (241.7 mg, 0.75 mmol) and MeCN/H<sub>2</sub>O = 1/2 (1 mL), the reaction was stirred at 80 °C for 12 h giving **2c** in 91% yield as a white solid by column chromatography (PE/EA = 4/1 to 1/1). **<sup>1</sup>H NMR** (400 MHz, *d*<sub>6</sub>-acetone) δ 7.83 (d, *J* = 8.9 Hz, 2H), 7.06 (d, *J* = 8.9 Hz, 2H), 6.43 (s, 2H), 3.87 (s, 3H); **<sup>13</sup>C NMR** (100 MHz, *d*<sub>6</sub>-acetone) δ 163.2, 137.0, 128.9, 114.7, 56.0; **IR** (KBr) ν 3348, 3270, 2980, 1598, 1500, 1309, 1157, 917, 835, 669 cm<sup>-1</sup>; **HRMS** (EI) for C<sub>7</sub>H<sub>9</sub>NO<sub>3</sub>S Calculated: 187.0303, found: 187.0306.

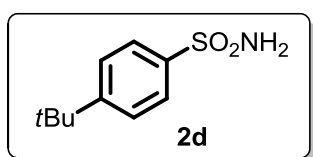

**4-(tert-Butyl)benzenesulfonamide (2d).** Prepared following general procedure using aryldiazonium salts **1d** (310 mg, 1.25 mmol), Na<sub>2</sub>S<sub>2</sub>O<sub>5</sub> (190.1 mg, 1.0 mmol), NaN<sub>3</sub> (32.5 mg, 0.5 mmol), PPh<sub>3</sub> (157.4 mg, 0.6 mmol), TBAB (241.7 mg, 0.75 mmol) and MeCN/H<sub>2</sub>O = 1/2 (1 mL), the reaction was stirred at 80 °C for 12 h giving **2d** in 84% yield as a white solid by column chromatography (PE/EA = 5/1 to 2/1). **<sup>1</sup>H NMR** (400 MHz, *d*<sub>6</sub>-acetone) δ 7.85 (dd, *J* = 16.2, 14.0 Hz, 2H), 7.60 (d, *J* = 8.6 Hz, 2H), 6.50 (s, 2H), 1.34 (s, 9H); **<sup>13</sup>C NMR** (100 MHz, *d*<sub>6</sub>-acetone) δ 156.1, 142.2, 126.7, 126.5, 35.5, 31.3; **IR** (KBr) ν 3363, 3268, 2963, 1568, 1500, 1364, 1166, 1113, 924, 832, 632 cm<sup>-1</sup>; **HRMS** (EI) for C<sub>7</sub>H<sub>9</sub>NO<sub>3</sub>S Calculated: 213.0823, found: 213.0825.

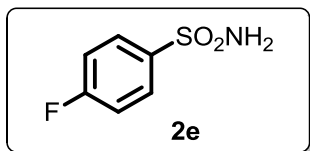

**4-Fluorobenzenesulfonamide (2e).** Prepared following general procedure using aryldiazonium salts **1e** (262.4 mg, 1.25 mmol), Na<sub>2</sub>S<sub>2</sub>O<sub>5</sub> (190.1 mg, 1.0 mmol), NaN<sub>3</sub> (32.5 mg, 0.5 mmol), PPh<sub>3</sub>(157.4 mg, 0.6 mmol), TBAB (241.7 mg, 0.75 mmol) and MeCN/H<sub>2</sub>O = 1/2 (1 mL), the reaction was stirred at 80 °C for 12 h giving **2e** in 75% yield as a white solid by column chromatography (PE/EA = 5/1 to 2/1). **<sup>1</sup>H NMR** (400 MHz, *d*<sub>6</sub>-acetone) δ 7.96 (dd, *J* = 8.8, 5.2 Hz, 2H), 7.33 (t, *J* = 8.8 Hz, 2H), 6.65 (s, 2H); **<sup>13</sup>C NMR** (100 MHz, *d*<sub>6</sub>-acetone) δ 164.3 (d, *J* = 250.6 Hz), 141.3 (d, *J* = 3.2 Hz), 129.7 (d, *J* = 9.3 Hz), 116.6 (d, *J* = 22.7 Hz); **<sup>19</sup>F NMR** (376 MHz, *d*<sub>6</sub>-acetone) δ 68.3; **IR** (KBr) ν 3362, 3261, 1587, 1493, 1292, 1177, 1100, 913, 840, 669 cm<sup>-1</sup>; **HRMS** (EI) for C<sub>6</sub>H<sub>6</sub>NO<sub>2</sub>SF Calculated: 175.0103, found: 175.0106.

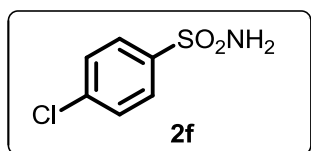

**4-Chlorobenzenesulfonamide (2f).** Prepared following general procedure using aryldiazonium salts **2f** (282.9 mg, 1.25 mmol), Na<sub>2</sub>S<sub>2</sub>O<sub>5</sub> (190.1 mg, 1.0 mmol), NaN<sub>3</sub> (32.5 mg, 0.5 mmol), PPh<sub>3</sub>(157.4 mg, 0.6 mmol), TBAB (241.7 mg, 0.75 mmol) and MeCN/H<sub>2</sub>O = 1/2 (1 mL), the reaction was stirred at 80 °C for 12 h giving **2f** in 60% yield as a white solid by column chromatography (PE/EA = 5/1 to 2/1). **<sup>1</sup>H NMR** (400 MHz, *d*<sub>6</sub>-acetone) δ 7.90 (d, *J* = 8.5 Hz, 2H), 7.61 (d, *J* = 8.5 Hz, 2H), 6.72 (s, 2H); **<sup>13</sup>C NMR** (100 MHz, *d*<sub>6</sub>-acetone) δ 144.0, 138.3, 129.9, 128.8; **IR** (KBr) ν 3333, 3240, 1572, 1475, 1331, 1150, 1089, 823, 756, 626 cm<sup>-1</sup>; **HRMS** (EI) for C<sub>6</sub>H<sub>6</sub>NO<sub>2</sub>SCl Calculated: 190.9808, found: 190.9807.

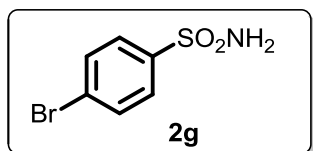

**4-Bromobenzenesulfonamide (2g).** Prepared following general procedure using aryldiazonium salts **1g** (338.5 mg, 1.25 mmol), Na<sub>2</sub>S<sub>2</sub>O<sub>5</sub> (190.1 mg, 1.0 mmol), NaN<sub>3</sub> (32.5 mg, 0.5 mmol), PPh<sub>3</sub> (157.4 mg, 0.6 mmol), TBAB (241.7 mg, 0.75 mmol) and MeCN/H<sub>2</sub>O = 1/2 (1 mL), the reaction was stirred at 80 °C for 12 h giving **2g** in 70% yield as a white solid by column chromatography (PE/EA = 5/1 to 2/1). <sup>1</sup>H NMR (400 MHz, d<sub>6</sub>-acetone) δ 7.83 (d, *J* = 8.6 Hz, 2H), 7.76 (d, *J* = 8.6 Hz, 2H), 6.71 (s, 2H); <sup>13</sup>C NMR (100 MHz, d<sub>6</sub>-acetone) δ 144.4, 132.9, 128.9, 126.7; IR (KBr) ν 3329, 3239, 3117, 1575, 1391, 1310, 1148, 1091, 818, 742, 613 cm<sup>-1</sup>; HRMS (EI) for C<sub>6</sub>H<sub>6</sub>NO<sub>2</sub>SBr Calculated: 234.9303, found: 234.9305.

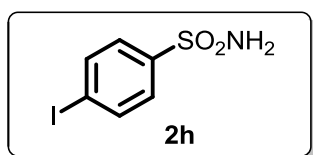

**4-Iodobenzenesulfonamide (2h).** Prepared following general procedure using aryldiazonium salts **1h** (397.3 mg, 1.25 mmol), Na<sub>2</sub>S<sub>2</sub>O<sub>5</sub> (190.1 mg, 1.0 mmol), NaN<sub>3</sub> (32.5 mg, 0.5 mmol), PPh<sub>3</sub> (157.4 mg, 0.6 mmol), TBAB (241.7 mg, 0.75 mmol) and MeCN/H<sub>2</sub>O = 1/2 (1 mL), the reaction was stirred at 80 °C for 12 h giving **2h** in 52% yield as a white solid by column chromatography (PE/EA = 5/1 to 2/1). <sup>1</sup>H NMR (400 MHz, d<sub>6</sub>-acetone) δ 8.04 – 7.92 (m, 2H), 7.73 – 7.63 (m, 2H), 6.72 (s, 2H); <sup>13</sup>C NMR (100 MHz, d<sub>6</sub>-acetone) δ 144.9, 138.9, 128.6, 99.1. IR (KBr) ν 3362, 3256, 2924, 1384, 1300, 1150, 1093, 816, 730, 533 cm<sup>-1</sup>; HRMS (EI) for C<sub>6</sub>H<sub>6</sub>NO<sub>2</sub>SI Calculated: 282.9164, found: 282.9160.

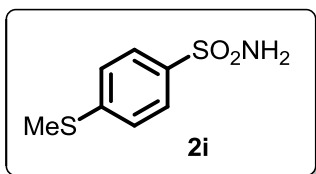

**4-(Methylthio)benzenesulfonamide (2i).** Prepared following general procedure using aryldiazonium salts **1i** (297.5 mg, 1.25 mmol), Na<sub>2</sub>S<sub>2</sub>O<sub>5</sub> (190.1 mg, 1.0 mmol), NaN<sub>3</sub> (32.5 mg, 0.5 mmol), PPh<sub>3</sub>(157.4

mg, 0.6 mmol), TBAB (241.7 mg, 0.75 mmol) and MeCN/H<sub>2</sub>O = 1/2 (1 mL), the reaction was stirred at 80 °C for 12 h giving **2i** in 88% yield as a brown solid by column chromatography (PE/EA = 4/1 to 2/1). **<sup>1</sup>H NMR** (400 MHz, *d*<sub>6</sub>-acetone) δ 7.79 (d, *J* = 8.5 Hz, 2H), 7.40 (d, *J* = 8.5 Hz, 2H), 6.55 (s, 2H), 2.56 (s, 3H); **<sup>13</sup>C NMR** (100 MHz, *d*<sub>6</sub>-acetone) δ 145.3, 141.1, 127.3, 126.0, 14.6; **IR** (KBr) ν 3335, 3244, 1305, 1160, 904, 810, 756, 536 cm<sup>-1</sup>; **HRMS** (EI) for C<sub>7</sub>H<sub>9</sub>NO<sub>2</sub>S<sub>2</sub> Calculated: 203.0075, found: 203.0073.

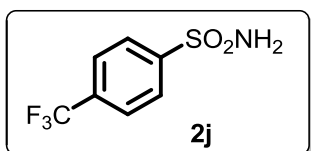

**4-(Trifluoromethyl)benzenesulfonamide (2j).**

Prepared following general procedure using aryldiazonium salts **1j** (325 mg, 1.25 mmol), Na<sub>2</sub>S<sub>2</sub>O<sub>5</sub> (190.1 mg, 1.0 mmol), NaN<sub>3</sub> (32.5 mg, 0.5 mmol), PPh<sub>3</sub>(157.4 mg, 0.6 mmol), TBAB (241.7 mg, 0.75 mmol) and MeCN/H<sub>2</sub>O = 1/2 (1 mL), the reaction was stirred at 80 °C for 12 h giving **2j** in 52% yield, as a white solid by column chromatography (PE/EA = 5/1 to 2/1). **<sup>1</sup>H NMR** (400 MHz, *d*<sub>6</sub>-acetone) δ 8.12 (d, *J* = 8.2 Hz, 2H), 7.94 (d, *J* = 8.3 Hz, 2H), 6.86 (s, 2H); **<sup>13</sup>C NMR** (100 MHz, *d*<sub>6</sub>-acetone) δ 148.71, 133.7 (q, *J* = 32.6 Hz), 127.8, 127.0 (q, *J* = 3.8 Hz), 124.6 (q, *J* = 271.9 Hz); **<sup>19</sup>F NMR** (376 MHz, *d*<sub>6</sub>-acetone) δ 113.97; **IR** (KBr) ν 3382, 3260, 1565, 1406, 1326, 1125, 1112, 838, 713, 611, 532 cm<sup>-1</sup>; **HRMS** (EI) for C<sub>7</sub>H<sub>6</sub>NO<sub>2</sub>SF<sub>3</sub> Calculated: 225.0071, found: 225.0074.

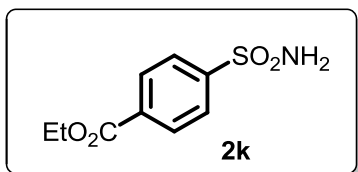

**Ethyl 4-sulfamoylbenzoate (2k).** Prepared following general procedure using aryldiazonium salts **1k** (329.9 mg, 1.25 mmol), Na<sub>2</sub>S<sub>2</sub>O<sub>5</sub> (190.1 mg, 1.0 mmol), NaN<sub>3</sub> (32.5 mg, 0.5 mmol),

PPh<sub>3</sub>(157.4 mg, 0.6 mmol), TBAB (241.7 mg, 0.75 mmol) and MeCN/H<sub>2</sub>O = 1/2 (1 mL), the reaction was stirred at 80 °C for 12 h giving **11i** in 78% yield as a white solid by column chromatography (PE/EA = 4/1 to 1/1). **<sup>1</sup>H NMR** (400 MHz, *d*<sub>6</sub>-acetone) δ 8.17 (d, *J* = 8.6 Hz, 2H), 8.02 (d, *J* = 8.5 Hz, 2H), 6.80 (s, 2H), 4.39 (q, *J* = 7.1 Hz, 2H), 1.38 (t, *J* = 7.1 Hz, 3H); **<sup>13</sup>C NMR** (100 MHz, *d*<sub>6</sub>-acetone) δ 165.7, 149.0, 134.5, 130.6, 127.3, 62.1, 14.5; **IR** (KBr) ν 3320, 3246, 1704, 1576, 1403, 1370, 1283, 1162, 1135, 855, 764, 690, 537 cm<sup>-1</sup>; **HRMS** (EI) for C<sub>9</sub>H<sub>11</sub>NO<sub>4</sub>S Calculated: 229.0405, found: 229.0405.

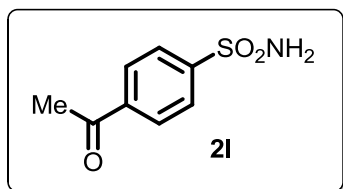

**4-Acetylbenzenesulfonamide (2l).** Prepared following general procedure using aryldiazonium salts **1l** (292.4 mg, 1.25 mmol), Na<sub>2</sub>S<sub>2</sub>O<sub>5</sub> (190.1 mg, 1.0 mmol), NaN<sub>3</sub> (32.5 mg, 0.5 mmol), PPh<sub>3</sub>(157.4

mg, 0.6 mmol), TBAB (241.7 mg, 0.75 mmol) and MeCN/H<sub>2</sub>O = 1/2 (1 mL), the reaction was stirred at 80 °C for 12 h giving **2l** in 51% yield as a white solid by column chromatography (PE/EA = 4/1 to 2/1). **<sup>1</sup>H NMR** (400 MHz, *d*<sub>6</sub>-acetone) δ 8.15 (d, *J* = 8.4 Hz, 2H), 8.01 (d, *J* = 8.4 Hz, 2H), 6.81 (s, 2H), 2.65 (s, 3H); **<sup>13</sup>C NMR** (100 MHz, *d*<sub>6</sub>-acetone) δ 197.3, 148.6, 140.4, 129.6, 127.1, 27.0; **IR** (KBr) ν 3310, 3215, 3098, 1668, 1401, 1406, 1350, 1159, 840, 785, 600 cm<sup>-1</sup>; **HRMS** (EI) for C<sub>8</sub>H<sub>9</sub>NO<sub>3</sub>S Calculated: 199.0303, found: 199.0306.



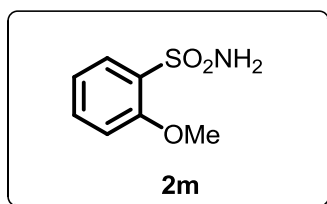

**2-Methoxybenzenesulfonamide (2m).** Prepared following general procedure using aryldiazonium salts **1m** (277.4 mg, 1.25 mmol), Na<sub>2</sub>S<sub>2</sub>O<sub>5</sub> (190.1 mg, 1.0 mmol), NaN<sub>3</sub> (32.5 mg, 0.5 mmol), PPh<sub>3</sub>(157.4 mg, 0.6 mmol), TBAB (241.7 mg, 0.75

mmol) and MeCN/H<sub>2</sub>O = 1/2 (1 mL), the reaction was stirred at 80 °C for 12 h giving **2m** in 82% yield as a white solid by column chromatography (PE/EA = 3/1 to 1/1). **<sup>1</sup>H NMR** (400 MHz, *d*<sub>6</sub>-acetone) δ 7.81 (dd, *J* = 7.7, 1.6 Hz, 1H), 7.64 – 7.53 (m, 1H), 7.22 (d, *J* = 8.3 Hz, 1H), 7.07 (t, *J* = 7.4 Hz, 1H), 6.31 (s, 2H), 3.99 (s, 3H); **<sup>13</sup>C NMR** (100 MHz, *d*<sub>6</sub>-acetone) δ 157.2, 134.6, 132.5, 128.7, 120.8, 113.2, 56.5; **IR** (KBr) ν 3375, 3265, 1589, 1481, 1300, 1150, 901, 801, 760 cm<sup>-1</sup>; **HRMS** (EI) for C<sub>7</sub>H<sub>9</sub>NO<sub>3</sub>S Calculated: 187.0303, found: 187.0304.

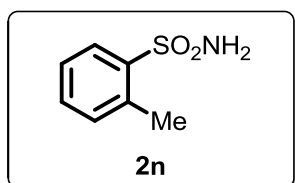

**2-Methylbenzenesulfonamide (2n).** Prepared following general procedure using aryldiazonium salts **1n** (257.4 mg, 1.25 mmol), Na<sub>2</sub>S<sub>2</sub>O<sub>5</sub> (190.1 mg, 1.0 mmol), NaN<sub>3</sub> (32.5 mg, 0.5 mmol), PPh<sub>3</sub>(157.4 mg, 0.6

mmol), TBAB (241.7 mg, 0.75 mmol) and MeCN/H<sub>2</sub>O = 1/2 (1 mL), the reaction was stirred at 80 °C for 12 h giving **2n** in 70% yield as a white solid by column chromatography (PE/EA = 5/1 to 2/1). **<sup>1</sup>H NMR** (400 MHz, *d*<sub>6</sub>-acetone) δ 7.95 (d, *J* = 7.8 Hz, 1H), 7.49 (t, *J* = 7.4 Hz, 1H), 7.36 (dd, *J* = 15.3, 7.5 Hz, 2H), 6.58 (s, 2H), 2.67 (s, 3H); **<sup>13</sup>C NMR** (100 MHz, *d*<sub>6</sub>-acetone) δ 143.0, 137.2, 133.0, 132.8, 128.3, 126.8, 20.3; **IR** (KBr) ν 3381, 3260, 1560, 1472, 1314, 1152, 1069, 921, 766, 595 cm<sup>-1</sup>; **HRMS** (EI) for C<sub>7</sub>H<sub>9</sub>NO<sub>2</sub>S Calculated:171.0354, found: 171.0354.

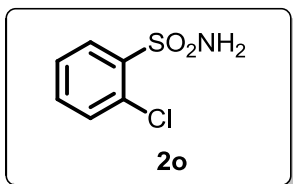

**2-Chlorobenzenesulfonamide (2o).**

Prepared following general procedure using aryldiazonium salts **1o** (282.9 mg, 1.25 mmol), Na<sub>2</sub>S<sub>2</sub>O<sub>5</sub> (190.1 mg, 1.0 mmol), NaN<sub>3</sub> (32.5 mg, 0.5 mmol), PPh<sub>3</sub> (157.4

mg, 0.6 mmol), TBAB (241.7 mg, 0.75 mmol) and MeCN/H<sub>2</sub>O = 1/2 (1 mL), the reaction was stirred at 80 °C for 12 h giving **2o** in 62% yield as a white solid by column chromatography (PE/EA = 5/1 to 2/1). **<sup>1</sup>H NMR** (400 MHz, *d*<sub>6</sub>-acetone) δ 8.11 – 8.04 (m, 1H), 7.67 – 7.59 (m, 2H), 7.57 – 7.48 (m, 1H), 6.78 (s, 2H); **<sup>13</sup>C NMR** (100 MHz, *d*<sub>6</sub>-acetone) δ 142.0, 134.2, 132.3, 131.9, 130.2, 128.1; **IR** (KBr) ν 3357, 3255, 1560, 1454, 1338, 1192, 1042, 913, 766, 590 cm<sup>-1</sup>; **HRMS** (EI) for C<sub>6</sub>H<sub>6</sub>NO<sub>2</sub>SCl Calculated: 190.9808, found: 190.9805.

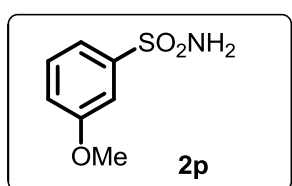

**3-Methoxybenzenesulfonamide (2p).**

Prepared following general procedure using aryldiazonium salts **1p** (277.4 mg, 1.25 mmol), Na<sub>2</sub>S<sub>2</sub>O<sub>5</sub> (190.1 mg, 1.0 mmol), NaN<sub>3</sub> (32.5 mg, 0.5 mmol), PPh<sub>3</sub> (157.4 mg, 0.6

mmol), TBAB (241.7 mg, 0.75 mmol) and MeCN/H<sub>2</sub>O = 1/2 (1 mL), the reaction was stirred at 80 °C for 12 h giving **2p** in 92% yield as a white solid by column chromatography (PE/EA = 4/1 to 1/1). **<sup>1</sup>H NMR** (500 MHz, *d*<sub>6</sub>-acetone) δ 7.49 – 7.45 (m, 2H), 7.43 (dd, *J* = 2.6, 1.1 Hz, 1H), 7.20 – 7.08 (m, 1H), 6.56 (s, 2H), 3.86 (s, 3H); **<sup>13</sup>C NMR** (125 MHz, *d*<sub>6</sub>-acetone) δ 160.7, 146.3, 130.8, 118.8, 118.5, 111.9, 55.9; **IR** (KBr) ν 3342, 3266, 1600, 1492, 1300, 1256, 1172, 1103, 1028, 906, 800, 691 cm<sup>-1</sup>; **HRMS** (EI) for C<sub>7</sub>H<sub>9</sub>NO<sub>3</sub>S Calculated: 187.0303, found: 187.0301.

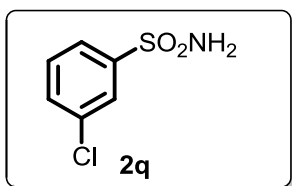

**3-Chlorobenzenesulfonamide (2q).** Prepared

following general procedure using aryldiazonium salts **1q** (282.9 mg, 1.25 mmol), Na<sub>2</sub>S<sub>2</sub>O<sub>5</sub> (190.1 mg, 1.0 mmol), NaN<sub>3</sub> (32.5 mg, 0.5 mmol), PPh<sub>3</sub> (157.4 mg, 0.6

mmol), TBAB (241.7 mg, 0.75 mmol) and MeCN/H<sub>2</sub>O = 1/2 (1 mL), the reaction was stirred at 80 °C for 12 h giving **2q** in 72% yield as a white solid by column chromatography (PE/EA = 5/1 to 2/1). <sup>1</sup>H NMR (400 MHz, d<sub>6</sub>-acetone) δ 7.93 – 7.80 (m, 2H), 7.70 – 7.57 (m, 2H), 6.78 (s, 2H); <sup>13</sup>C NMR (100 MHz, d<sub>6</sub>-acetone) δ 146.9, 135.0, 132.7, 131.7, 126.8, 125.4; IR (KBr) ν 3332, 3243, 1552, 1422, 1350, 1182, 1078, 901, 793, 677 cm<sup>-1</sup>; HRMS (EI) for C<sub>6</sub>H<sub>6</sub>NO<sub>2</sub>SCl Calculated: 190.9808, found: 190.9805.

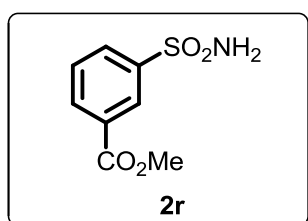

**Methyl 3-sulfamoylbenzoate (2r).** Prepared

following general procedure using aryldiazonium salts **1r** (312.4 mg, 1.25 mmol), Na<sub>2</sub>S<sub>2</sub>O<sub>5</sub> (190.1 mg, 1.0 mmol), NaN<sub>3</sub> (32.5 mg, 0.5 mmol), PPh<sub>3</sub> (157.4 mg, 0.6 mmol), TBAB (241.7 mg, 0.75 mmol) and

MeCN/H<sub>2</sub>O = 1/2 (1 mL), the reaction was stirred at 80 °C for 12 h giving **2r** in 54% yield as a white solid by column chromatography (PE/EA = 5/1 to 2/1). <sup>1</sup>H NMR (400 MHz, d<sub>6</sub>-acetone) δ 8.49 (s, 1H), 8.20 (d, J = 7.8 Hz, 1H), 8.14 (d, J = 7.9 Hz, 1H), 7.73 (t, J = 7.8 Hz, 1H), 6.79 (s, 2H), 3.94 (s, 3H); <sup>13</sup>C NMR (100 MHz, d<sub>6</sub>-acetone) δ 166.1, 145.7, 133.3, 131.9, 131.1, 130.4, 127.7, 52.8; IR (KBr) ν 3289, 3238, 1704, 1598, 1443, 1300, 1168, 1075, 967, 752, 681 cm<sup>-1</sup>; HRMS (EI) for C<sub>8</sub>H<sub>9</sub>NO<sub>4</sub>S Calculated: 215.0252, found: 215.0249.

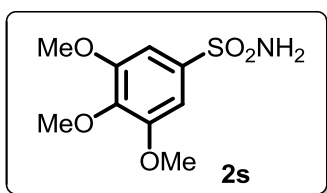

**3,4,5-Trimethoxybenzenesulfonamide (2s).**

Prepared following general procedure using aryldiazonium salts **1s** (353.5 mg, 1.25 mmol),  $\text{Na}_2\text{S}_2\text{O}_5$  (190.1 mg, 1.0 mmol),  $\text{NaN}_3$  (32.5 mg, 0.5 mmol),  $\text{PPh}_3$  (157.4 mg, 0.6 mmol), TBAB (241.7 mg, 0.75 mmol) and  $\text{MeCN}/\text{H}_2\text{O} = 1/2$  (1 mL), the reaction was stirred at 80 °C for 12 h giving **2s** in 85% yield as a brown solid by column chromatography (PE/EA = 3/1 to 1/1).  **$^1\text{H}$  NMR** (400 MHz,  $d_6$ -acetone)  $\delta$  7.19 (s, 2H), 6.51 (s, 2H), 3.87 (s, 6H), 3.78 (s, 3H);  **$^{13}\text{C}$  NMR** (100 MHz,  $d_6$ -acetone)  $\delta$  154.2, 141.9, 140.1, 104.5, 60.7, 56.7; **IR** (KBr)  $\nu$  3361, 3263, 1590, 1409, 1314, 1232, 1128, 990, 931, 842, 619  $\text{cm}^{-1}$ ; **HRMS** (EI) for  $\text{C}_9\text{H}_{13}\text{NO}_5\text{S}$  Calculated: 247.0514, found: 247.0515.

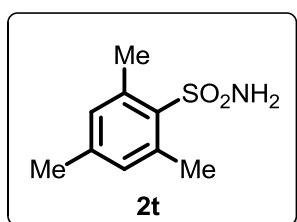

**2,4,6-Trimethylbenzenesulfonamide (2t).** Prepared following general procedure using aryldiazonium salts **1t** (292.5 mg, 1.25 mmol),  $\text{Na}_2\text{S}_2\text{O}_5$  (190.1 mg, 1.0 mmol),  $\text{NaN}_3$  (32.5 mg, 0.5 mmol),  $\text{PPh}_3$  (157.4 mg,

0.6 mmol), TBAB (241.7 mg, 0.75 mmol) and  $\text{MeCN}/\text{H}_2\text{O} = 1/2$  (1 mL), the reaction was stirred at 80 °C for 12 h giving **2t** in 71% yield as a brown solid by column chromatography (PE/EA = 5/1 to 2/1).  **$^1\text{H}$  NMR** (400 MHz,  $\text{CDCl}_3$ )  $\delta$  6.97 (s, 2H), 4.79 (s, 2H), 2.65 (s, 6H), 2.30 (s, 3H);  **$^{13}\text{C}$  NMR** (100 MHz,  $\text{CDCl}_3$ )  $\delta$  142.2, 138.2, 135.9, 131.9, 22.9, 20.9; **IR** (KBr)  $\nu$  3342, 3202, 1384, 1010, 1005, 824, 764, 658  $\text{cm}^{-1}$ ; **HRMS** (EI) for  $\text{C}_9\text{H}_{13}\text{NO}_2\text{S}$  Calculated: 199.0667, found: 199.0670.

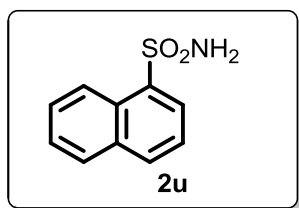

**Naphthalene-1-sulfonamide (2u).** Prepared following general procedure using aryldiazonium salts **1u** (302.4 mg, 1.25 mmol), Na<sub>2</sub>S<sub>2</sub>O<sub>5</sub> (190.1 mg, 1.0 mmol), NaN<sub>3</sub> (32.5 mg, 0.5 mmol), PPh<sub>3</sub> (157.4 mg, 0.6 mmol), TBAB (241.7 mg, 0.75 mmol) and MeCN/H<sub>2</sub>O = 1/2 (1 mL), the reaction was stirred at 80 °C for 12 h giving **2u** in 58% yield as a white solid by column chromatography (PE/EA = 5/1 to 2/1). **<sup>1</sup>H NMR** (400 MHz, *d*<sub>6</sub>-acetone) δ 8.78 (d, *J* = 8.4 Hz, 1H), 8.27 (d, *J* = 7.3 Hz, 1H), 8.16 (d, *J* = 8.2 Hz, 1H), 8.05 (d, *J* = 7.9 Hz, 1H), 7.76 – 7.55 (m, 3H), 6.84 (s, 2H); **<sup>13</sup>C NMR** (100 MHz, *d*<sub>6</sub>-acetone) δ 140.0, 135.1, 134.1, 129.7, 128.9, 128.4, 127.8, 127.5, 126.0, 125.1; **IR** (KBr) ν 3380, 3280, 1567, 1325, 1131, 979, 887, 767 cm<sup>-1</sup>; **HRMS** (EI) for C<sub>10</sub>H<sub>9</sub>NO<sub>2</sub>S Calculated: 207.0354, found: 207.0356.

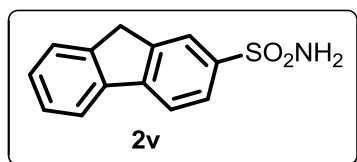

**9H-Fluorene-2-sulfonamide (2v).** Prepared following general procedure using aryldiazonium salts **1v** (350 mg, 1.25 mmol), Na<sub>2</sub>S<sub>2</sub>O<sub>5</sub> (190.1 mg, 1.0 mmol), NaN<sub>3</sub> (32.5 mg, 0.5 mmol), PPh<sub>3</sub> (157.4 mg, 0.6 mmol), TBAB (241.7 mg, 0.75 mmol) and MeCN/H<sub>2</sub>O = 1/2 (1 mL), the reaction was stirred at 80 °C for 12 h giving **2v** in 65% yield as a brown solid by column chromatography (PE/EA = 5/1 to 2/1). **<sup>1</sup>H NMR** (400 MHz, *d*<sub>6</sub>-acetone) δ 8.08 (s, 1H), 8.03 (d, *J* = 8.0 Hz, 1H), 7.98 (d, *J* = 6.8 Hz, 1H), 7.93 (d, *J* = 7.4 Hz, 1H), 7.65 (d, *J* = 7.2 Hz, 1H), 7.48 – 7.37 (m, 2H), 4.03 (s, 2H); **<sup>13</sup>C NMR** (100 MHz, *d*<sub>6</sub>-acetone) δ 145.8, 145.2, 144.6, 143.3, 140.9, 128.9, 127.9, 126.1, 125.9, 123.8, 121.6, 120.8, 37.4; **IR** (KBr) ν 3360, 3256, 1547, 1331, 1144, 1159, 1072, 771, 737, 586 cm<sup>-1</sup>; **HRMS** (EI) for C<sub>13</sub>H<sub>11</sub>NO<sub>2</sub>S Calculated: 245.0511, found: 245.0512.

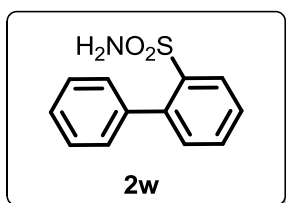

**[1,1'-Biphenyl]-2-sulfonamide (2w).** Prepared following general procedure using aryldiazonium salts **1w** (335 mg, 1.25 mmol), Na<sub>2</sub>S<sub>2</sub>O<sub>5</sub> (190.1 mg, 1.0 mmol), NaN<sub>3</sub> (32.5 mg, 0.5 mmol), PPh<sub>3</sub> (157.4 mg, 0.6 mmol), TBAB (241.7 mg, 0.75 mmol) and MeCN/H<sub>2</sub>O = 1/2 (1 mL), the reaction was stirred at 80 °C for 12 h giving **2w** in 64% yield as a white solid by column chromatography (PE/EA = 5/1 to 2/1). <sup>1</sup>H NMR (500 MHz, CDCl<sub>3</sub>) δ 8.13 (dd, *J* = 5.8, 4.8 Hz, 1H), 7.63 – 7.56 (m, 1H), 7.53 – 7.42 (m, 6H), 7.39 – 7.31 (m, 1H), 4.20 (s, 2H); <sup>13</sup>C NMR (126 MHz, CDCl<sub>3</sub>) δ 140.7, 140.0, 138.9, 132.2(0), 132.1(6), 129.5, 128.5, 128.4, 127.8, 127.5; IR (KBr) ν 3349, 3267, 1588, 1295, 1171, 916, 820, 730, 656 cm<sup>-1</sup>; HRMS (EI) for C<sub>12</sub>H<sub>11</sub>NO<sub>2</sub>S Calculated: 233.0511, found: 233.0509.

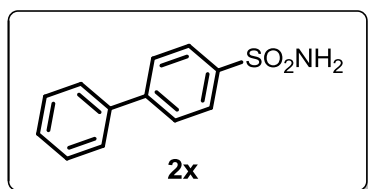

**[1,1'-biphenyl]-4-sulfonamide (2x).** Prepared following general procedure using aryldiazonium salts **1x** (335 mg, 1.25 mmol), Na<sub>2</sub>S<sub>2</sub>O<sub>5</sub> (190.1 mg, 1.0 mmol), NaN<sub>3</sub> (32.5 mg, 0.5 mmol), PPh<sub>3</sub> (157.4 mg, 0.6 mmol), TBAB (241.7 mg, 0.75 mmol) and MeCN/H<sub>2</sub>O = 1/2 (1 mL), the reaction was stirred at 80 °C for 12 h giving **2x** in 81% yield as a white solid by column chromatography (PE/EA = 5/1 to 2/1). <sup>1</sup>H NMR (400 MHz, *d*<sub>6</sub>-acetone) δ 7.98 (d, *J* = 8.3 Hz, 2H), 7.85 (d, *J* = 8.3 Hz, 2H), 7.73 (d, *J* = 7.3 Hz, 2H), 7.51 (t, *J* = 7.5 Hz, 2H), 7.43 (t, *J* = 7.3 Hz, 1H); <sup>13</sup>C NMR (100 MHz, *d*<sub>6</sub>-acetone) δ 145.3, 143.8, 140.2, 129.9, 129.1, 128.1, 128.0, 127.5; IR (KBr) ν 3345, 3257, 1536, 1295, 1159, 906, 840, 750, 691 cm<sup>-1</sup>; HRMS (EI) for C<sub>12</sub>H<sub>11</sub>NO<sub>2</sub>S Calculated: 233.0511, found: 233.0508.

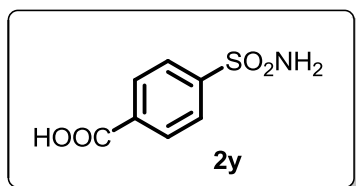

**4-sulfamoylbenzoic acid (2y).** Prepared following general procedure using aryldiazonium salts **1y** (294.9 mg, 1.25 mmol), Na<sub>2</sub>S<sub>2</sub>O<sub>5</sub> (190.1 mg, 1.0 mmol), NaN<sub>3</sub> (32.5 mg, 0.5 mmol), PPh<sub>3</sub> (157.4 mg, 0.6 mmol), TBAB (241.7 mg, 0.75 mmol) and MeCN/H<sub>2</sub>O = 1/2 (1 mL), the reaction was stirred at 80 °C for 12 h giving **2y** in 60% yield as a white solid by column chromatography (DCM/MeOH = 20/1 to 10/1). **<sup>1</sup>H NMR** (500 MHz, *d*<sub>6</sub>-DMSO) δ 13.38 (s, 1H), 8.15 – 8.07 (m, 2H), 7.97 – 7.89 (m, 2H), 7.53 (s, 2H); **<sup>13</sup>C NMR** (125 MHz, *d*<sub>6</sub>-DMSO) δ 166.3, 147.7, 133.6, 130.0, 125.9; **IR** (KBr) ν 3359, 3260, 1688, 1577, 1287, 1159, 864, 727, 688 cm<sup>-1</sup>; **HRMS** (EI) for C<sub>7</sub>H<sub>7</sub>NO<sub>4</sub>S Calculated: 201.0096, found: 201.0091.

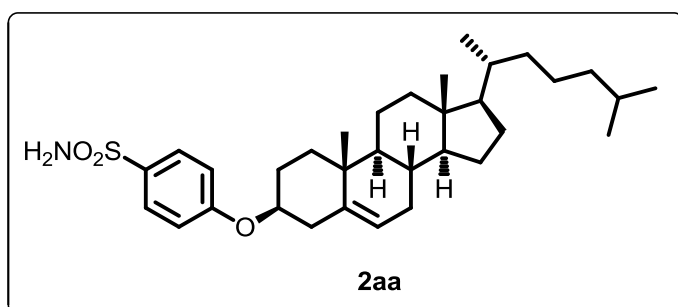

**4-(((3S,8S,9S,10R,13R,14S,17R)-10,13-dimethyl-17-((R)-6-methylheptan-2-yl)-2,3,4,7,8,9,10,11,12,13,14,15,16,17-tetradecahydro-1H-cyclopenta[a]phenanthren-3-yl)oxy)benzenesulfonamide (2aa).** Prepared following general procedure using aryldiazonium salts **1aa** (720.7 mg, 1.25 mmol), Na<sub>2</sub>S<sub>2</sub>O<sub>5</sub> (190.1 mg, 1.0 mmol), NaN<sub>3</sub> (32.5 mg, 0.5 mmol), PPh<sub>3</sub> (157.4 mg, 0.6 mmol), TBAB (241.7 mg, 0.75 mmol) and MeCN/H<sub>2</sub>O = 1/2 (1 mL), the reaction was stirred at 80 °C for 12 h giving **2aa** in 72% yield as a white solid by column chromatography (PE/EA = 2/1 to 1/1). **<sup>1</sup>H NMR** (400 MHz, CDCl<sub>3</sub>) δ 6.75 (d, *J* = 8.6 Hz, 2H), 6.62 (d, *J* = 8.6 Hz, 2H), 5.36 (d, *J* = 4.7 Hz, 1H), 4.01 – 3.79 (m, 1H), 3.11 (s, 2H), 2.53 – 2.29 (m, 2H), 2.09 – 0.77 (m, 38H), 0.69 (s, 3H); **<sup>13</sup>C NMR** (100 MHz, CDCl<sub>3</sub>) δ 150.7, 140.6, 140.1, 122.0, 117.9, 116.4, 78.4, 56.8, 56.2, 50.2, 42.3, 39.8, 39.5, 38.9, 37.2, 36.8, 36.2, 35.8, 31.9, 31.9, 28.4, 28.2, 28.0, 24.3, 23.8, 22.8, 22.6, 21.1, 19.4, 18.7, 11.9; **HRMS** (EI) for C<sub>33</sub>H<sub>51</sub>NO<sub>3</sub>S

Calculated: 541.3590, found: 541.3582.

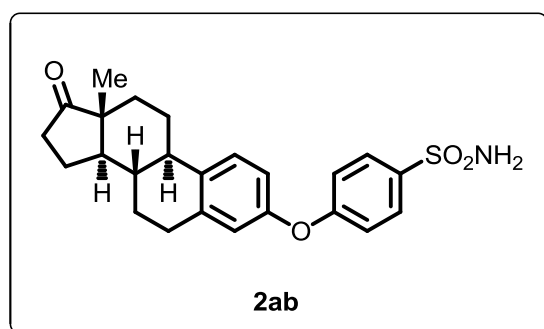

**4-(((8S,9R,13R,14R)-13-methyl-17-oxo-7,8,9,11,12,13,14,15,16,17-decahydro-6H-cyclopenta[a]phenanthren-3-yl)oxy)benzenesulfonamide (2ab).** Prepared following general procedure using aryldiazonium salts

**1ab** (575.3 mg, 1.25 mmol),  $\text{Na}_2\text{S}_2\text{O}_5$  (190.1 mg, 1.0 mmol),  $\text{NaN}_3$  (32.5 mg, 0.5 mmol),  $\text{PPh}_3$  (157.4 mg, 0.6 mmol), TBAB (241.7 mg, 0.75 mmol) and  $\text{MeCN}/\text{H}_2\text{O} = 1/2$  (1 mL), the reaction was stirred at 80 °C for 12 h giving **2ab** in 78% yield as a white solid by column chromatography (PE/EA = 2/1 to 1/1).  **$^1\text{H}$  NMR** (500 MHz,  $\text{CDCl}_3$ )  $\delta$  7.87 (dd,  $J = 9.3, 2.2$  Hz, 2H), 7.32 (d,  $J = 8.5$  Hz, 1H), 7.03 (dd,  $J = 9.2, 2.2$  Hz, 2H), 6.86 (dd,  $J = 8.5, 2.5$  Hz, 1H), 6.80 (d,  $J = 6.5$  Hz, 1H), 5.19 (s, 2H), 2.92 (dd,  $J = 10.4, 4.6$  Hz, 2H), 2.53 (dd,  $J = 19.1, 8.6$  Hz, 1H), 2.49 – 2.39 (m, 1H), 2.32 (td,  $J = 10.8, 3.7$  Hz, 1H), 2.23 – 2.13 (m, 1H), 2.07 (ddd,  $J = 13.4, 10.7, 5.5$  Hz, 2H), 1.98 (dd,  $J = 12.5, 3.3$  Hz, 1H), 1.72 – 1.41 (m, 6H), 0.95 (s, 3H);  **$^{13}\text{C}$  NMR** (125 MHz,  $\text{CDCl}_3$ )  $\delta$  161.7, 152.9, 138.8, 136.5, 135.4, 128.6, 127.0, 120.2, 117.5, 117.4, 50.3, 47.9, 44.1, 38.0, 35.8, 31.5, 29.4, 26.3, 25.8, 21.5, 13.8; **IR** (KBr)  $\nu$  3573, 3505, 2926, 1725, 1591, 1165, 1489, 1327, 1261, 1156, 921, 838, 543  $\text{cm}^{-1}$ ; **HRMS** (EI) for  $\text{C}_{24}\text{H}_{27}\text{NO}_4\text{S}$  Calculated: 425.1661, found: 425.1664.

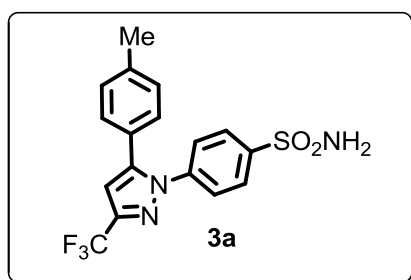

**Celecoxib (3a).** Prepared following general procedure using aryldiazonium salts **1ba** (520.1 mg, 1.25 mmol),  $\text{Na}_2\text{S}_2\text{O}_5$  (190.1 mg, 1.0 mmol),  $\text{NaN}_3$  (32.5 mg, 0.5 mmol),  $\text{PPh}_3$  (157.4 mg, 0.6 mmol), TBAB (241.7 mg,

0.75 mmol) and  $\text{MeCN}/\text{H}_2\text{O} = 1/2$  (1 mL), the reaction was stirred at 80 °C for



12 h giving **3a** in 72% yield as a white solid by column chromatography (DCM/MeOH = 30/1 to 20/1). **<sup>1</sup>H NMR** (400 MHz, *d*<sub>6</sub>-DMSO) δ 7.89 (d, *J* = 8.5 Hz, 2H), 7.55 (d, *J* = 8.8 Hz, 4H), 7.18 – 7.24 (m, 5H), 2.32 (s, 3H); **<sup>13</sup>C NMR** (100 MHz, *d*<sub>6</sub>-DMSO) δ 145.3, 144.0, 142.2 (q, *J* = 37.7 Hz), 141.1, 139.1, 129.4, 128.8, 126.8, 126.0, 121.3 (q, *J* = 269.9 Hz), 106.1, 20.8; **<sup>19</sup>F NMR** (376 MHz, *d*<sub>6</sub>-DMSO) δ -60.85; **IR** (KBr) ν 3341, 3233, 1348, 1274, 1165, 1135, 981, 845, 792, 633 cm<sup>-1</sup>; **HRMS** (EI) for C<sub>17</sub>H<sub>14</sub>N<sub>3</sub>O<sub>2</sub>SF<sub>3</sub> Calculated: 381.0759, found: 381.0762.

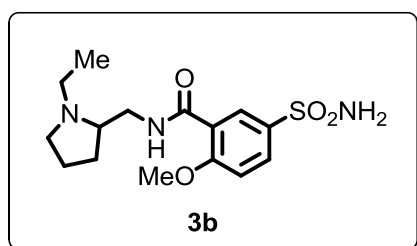

**Sulpiride (3b).** Prepared following general procedure using aryldiazonium salts **1bb** (470.1 mg, 1.25 mmol), Na<sub>2</sub>S<sub>2</sub>O<sub>5</sub> (190.1 mg, 1.0 mmol), NaN<sub>3</sub> (32.5 mg, 0.5 mmol), PPh<sub>3</sub>(157.4 mg, 0.6 mmol), TBAB (241.7 mg,

0.75 mmol) and MeCN/H<sub>2</sub>O = 1/2 (1 mL), the reaction was stirred at 80 °C for 12 h giving **3b** in 60% yield as a white solid by column chromatography (DCM/MeOH = 20/1 to 10/1). **<sup>1</sup>H NMR** (400 MHz, *d*<sub>6</sub>-DMSO) δ 8.43 – 8.32 (m, 1H), 8.28 (d, *J* = 2.4 Hz, 1H), 7.89 (dd, *J* = 8.7, 2.4 Hz, 1H), 7.38 – 7.25 (m, 3H), 3.97 (s, 3H), 3.60 – 3.44 (m, 1H), 3.24 – 3.04 (m, 2H), 2.82 (dq, *J* = 14.6, 7.3 Hz, 1H), 2.57 (d, *J* = 8.1 Hz, 1H), 2.26 – 2.06 (m, 2H), 1.87 - 1.75 (m, 1H), 1.64 – 1.42 (m, 3H), 1.06 (t, *J* = 7.2 Hz, 3H); **<sup>13</sup>C NMR** (100 MHz, *d*<sub>6</sub>-DMSO) δ 163.5, 159.2, 136.4, 129.9, 128.7, 122.7, 112.6, 62.0, 56.6, 53.2, 47.6, 41.7, 28.2, 22.5, 14.1; **IR** (KBr) ν 3385, 3209, 2968, 1644, 1547, 1480, 1365, 1160, 1091, 933, 827, 575 cm<sup>-1</sup>; **HRMS** (EI) for C<sub>15</sub>H<sub>23</sub>N<sub>3</sub>O<sub>4</sub>S Calculated: 341.1409, found: 341.1422.

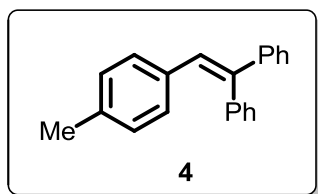

**(2-(p-Tolyl)ethene-1,1-diyl)dibenzene (4)**. Prepared

following general procedure using aryldiazonium salts **1a** (257.4 mg, 1.25 mmol), Na<sub>2</sub>S<sub>2</sub>O<sub>5</sub> (190.1 mg, 1.0 mmol), NaN<sub>3</sub> (32.5 mg, 0.5 mmol), PPh<sub>3</sub> (157.4

mg, 0.6 mmol), TBAB (241.7 mg, 0.75 mmol), 1,1-diphenylethylene (135.2 mg, 0.75 mmol) and MeCN/H<sub>2</sub>O = 1/2 (1 mL), the reaction was stirred at 80 °C for 12 h giving **4** in 15% yield as an oil by column chromatography (PE to PE/EA = 50/1). **<sup>1</sup>H NMR** (500 MHz, CDCl<sub>3</sub>) δ 7.38– 7.27 (m, 8H), 7.25 – 7.21 (m, 2H), 6.98 – 6.90 (m, 5H), 2.28 (s, 3H); **<sup>13</sup>C NMR** (125 MHz, CDCl<sub>3</sub>) δ 143.5, 141.7, 140.6, 136.6, 134.5, 130.4, 129.4, 128.7, 128.6, 128.2, 128.1, 127.5, 127.3(2), 127.2(9), 21.2; **HRMS** (EI) for C<sub>21</sub>H<sub>18</sub> Calculated: 270.1409, found: 270.1410.

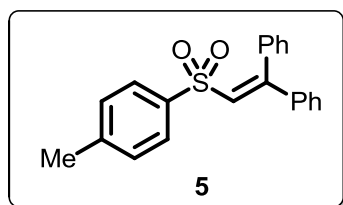

**(2-Tosylethene-1,1-diyl)dibenzene (5)**. Following

the same procedure with compound **4** to give **5** in 8% yield as a brown oil by column chromatography (PE/EA = 20/1 to 10/1). **<sup>1</sup>H NMR** (500 MHz, CDCl<sub>3</sub>)

δ 7.48 (d, *J* = 8.3 Hz, 2H), 7.37 (td, *J* = 7.2, 5.2 Hz, 2H), 7.30 (t, *J* = 7.7 Hz, 4H), 7.20 (d, *J* = 7.2 Hz, 2H), 7.15 (d, *J* = 8.1 Hz, 2H), 7.10 (d, *J* = 7.0 Hz, 2H), 6.99 (s, 1H), 2.38 (s, 3H); **<sup>13</sup>C NMR** (125 MHz, CDCl<sub>3</sub>) δ 154.7, 143.7, 139.2, 138.6, 135.5, 130.2, 129.7, 129.3, 128.9, 128.8, 128.5, 128.2, 127.8, 127.7, 21.5. **HRMS** (EI) for C<sub>21</sub>H<sub>18</sub>O<sub>2</sub>S Calculated: 334.1028, found: 334.1024.

#### IV. The $^{31}\text{P}$ NMR in different reaction times

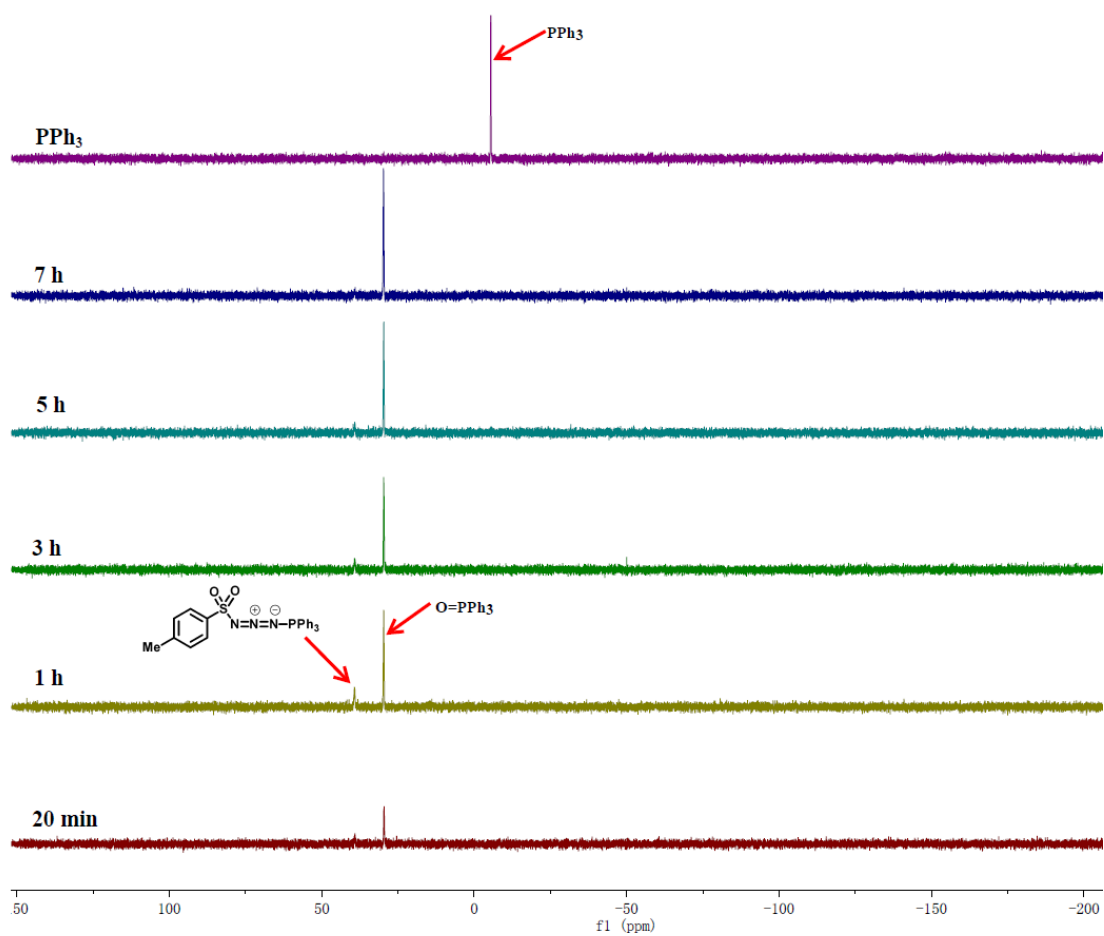

## V. The kinetic studies

(1) Rates for varying  $\text{ArN}_2\text{BF}_4$  (**1a**)

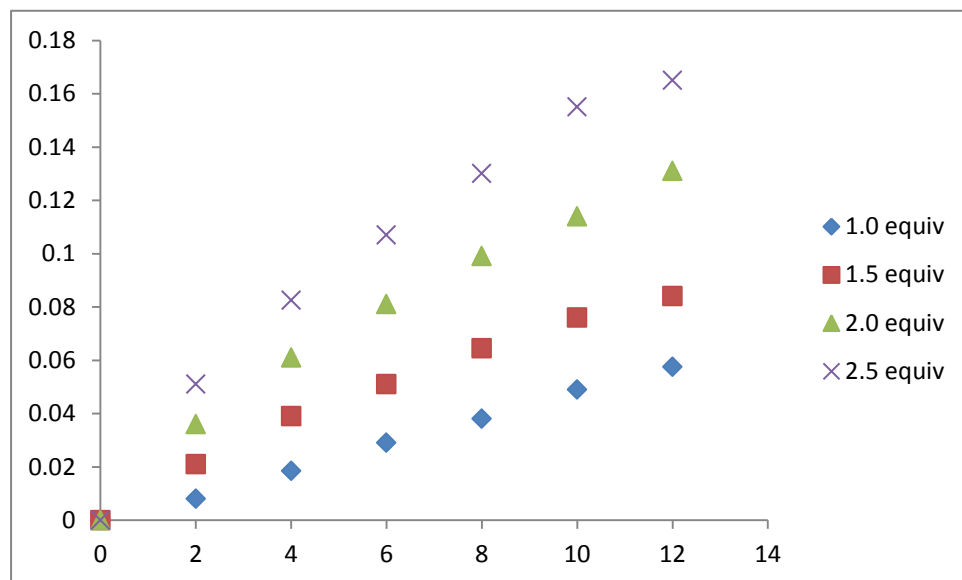

Rate = [product]/[time]

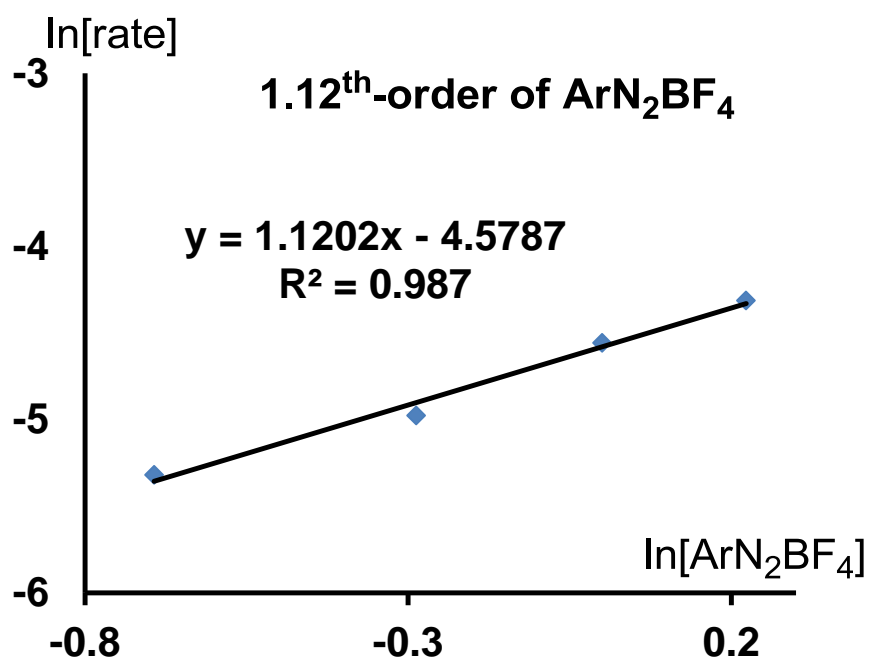

(2) Rates for varying  $\text{Na}_2\text{S}_2\text{O}_5$

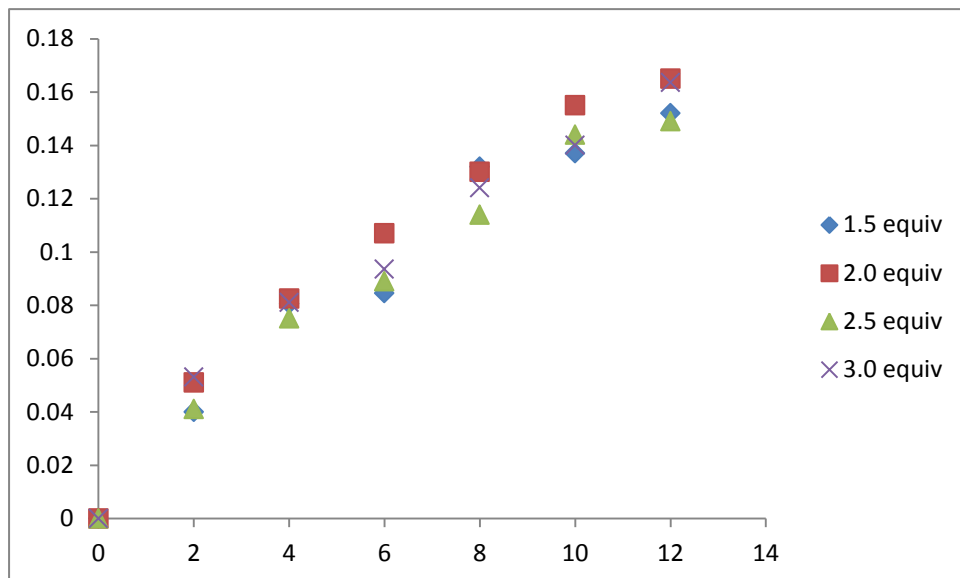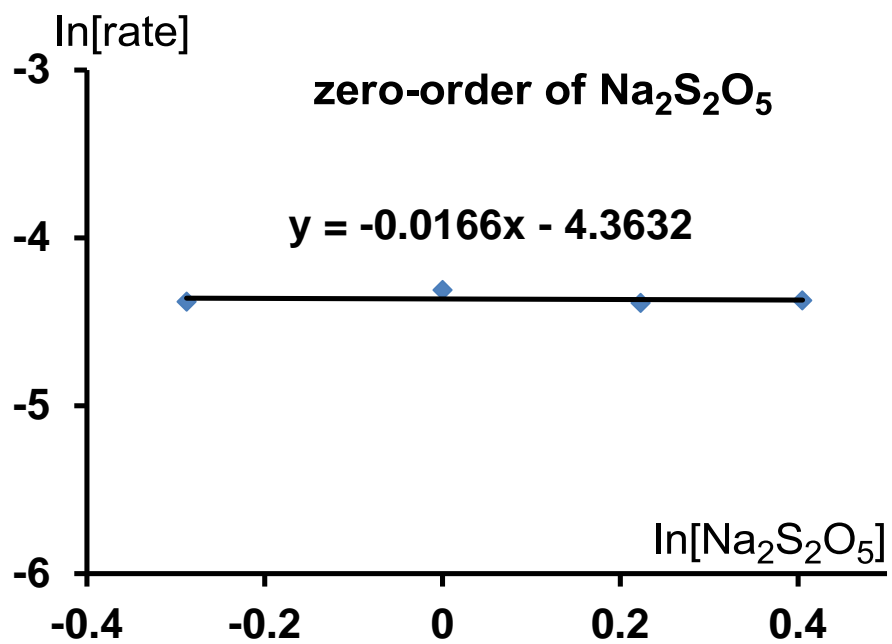

(3) Rates for varying  $\text{NaN}_3$

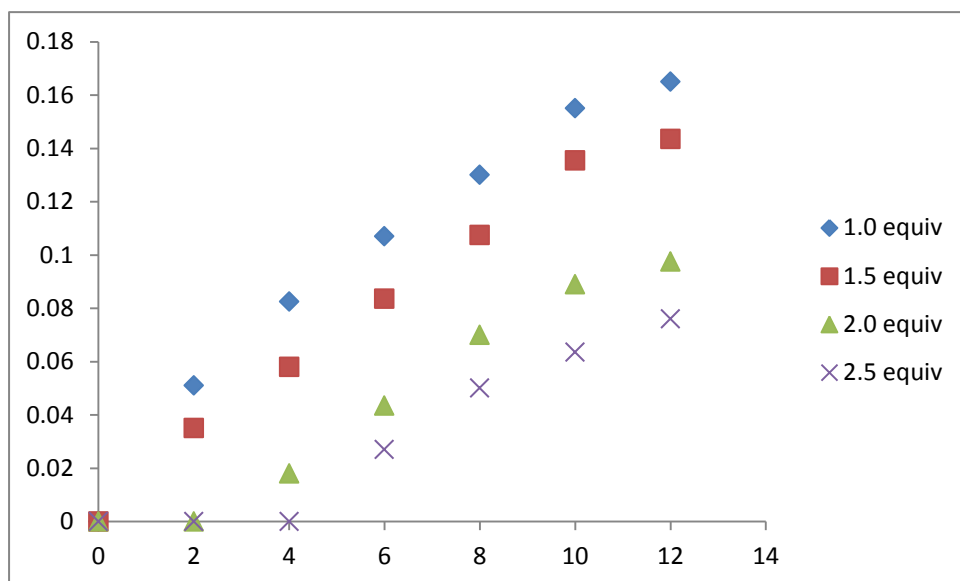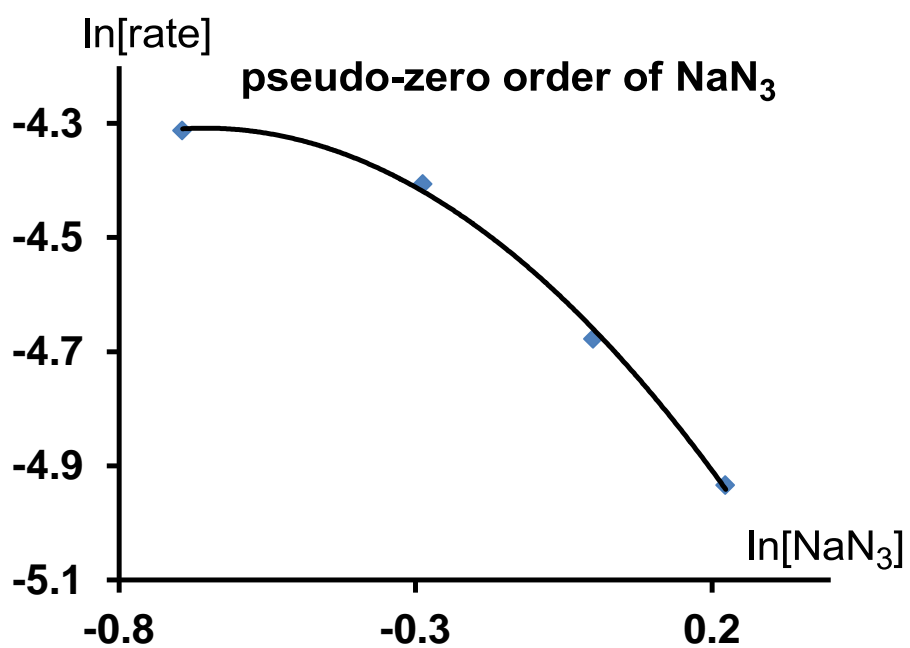

(4) Rates for varying PPh<sub>3</sub>

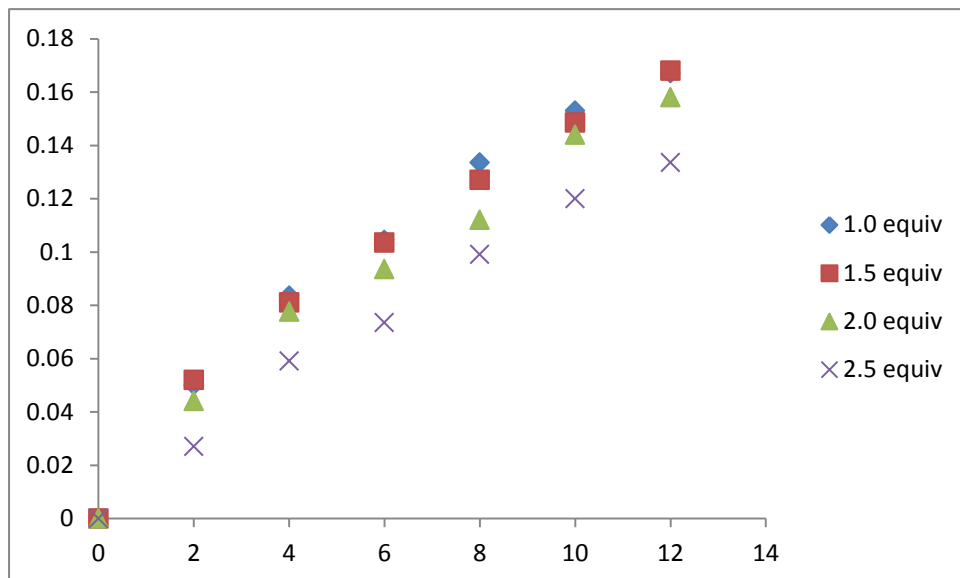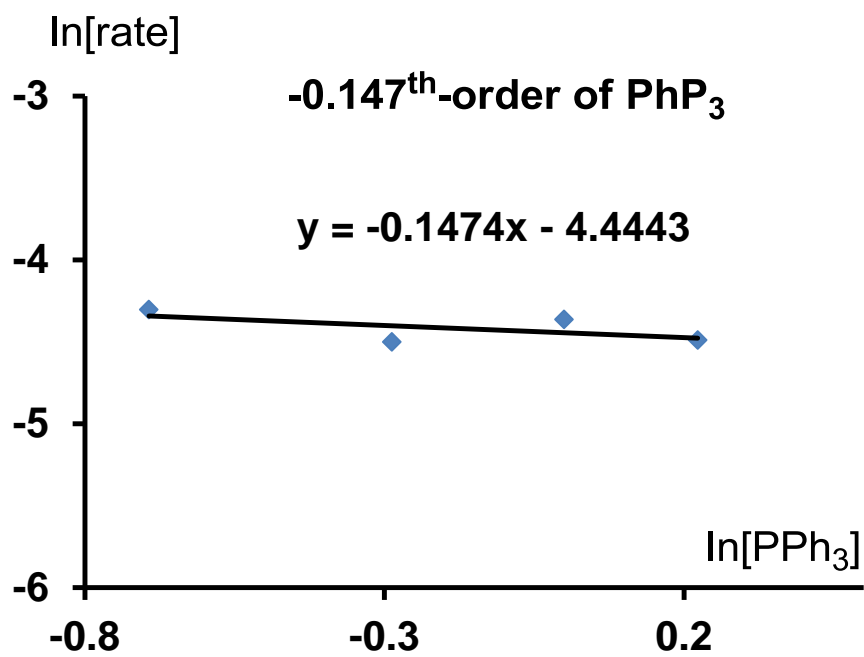

## VI. X-Ray Crystal Structures

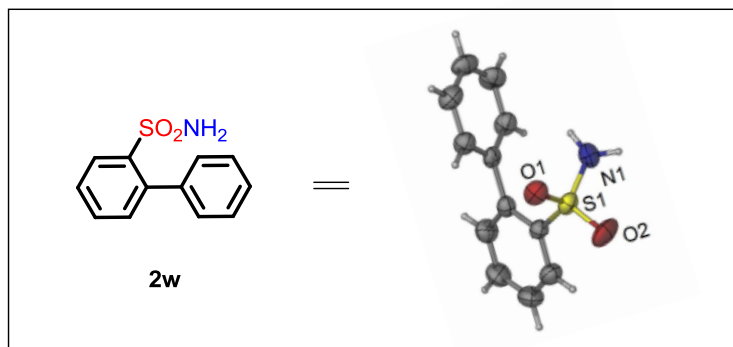

Table S2. Sample and crystal data for **2w** (CCDC 1868563).

|                                        |                                                                                   |
|----------------------------------------|-----------------------------------------------------------------------------------|
| Bond precision                         | C-C = 0.0027 Å                                                                    |
|                                        | Wavelength = 1.54184                                                              |
| Cell                                   | a = 11.1231 (2) α = 90°<br>b = 11.9525(2) β = 99.993(2)<br>c = 8.5577 (1) γ = 90° |
| Temperature                            | 293 K                                                                             |
| Volume                                 | 1120.48(3)                                                                        |
| Space group                            | P 1 21/c 1                                                                        |
| Sum formula                            | C <sub>12</sub> H <sub>11</sub> N O <sub>2</sub> S                                |
| Mr                                     | 233.28                                                                            |
| D <sub>x</sub> , g cm <sup>-3</sup>    | 1.383                                                                             |
| Z                                      | 4                                                                                 |
| Mu (mm <sup>-1</sup> )                 | 2.441                                                                             |
| F <sub>000</sub>                       | 488.0                                                                             |
| h,k,l <sub>max</sub>                   | 13, 14, 10                                                                        |
| N <sub>ref</sub>                       | 1960                                                                              |
| T <sub>min</sub> , T <sub>max</sub>    | 0.276, 1.000                                                                      |
| Correction method= # Reported T Limits | T <sub>min</sub> = 0.276 T <sub>max</sub> = 1.000                                 |
| AbsCorr = MULTI-SCAN                   |                                                                                   |
| Data completeness                      | 0.980                                                                             |
| Theta(max)                             | 67.062                                                                            |
| R(reflections)                         | 0.0395(1824)                                                                      |
| wR <sub>2</sub> (reflections)          | 0.1078 (1960)                                                                     |
| S                                      | 1.041                                                                             |
| N <sub>par</sub>                       | 146                                                                               |



## X. References

- (1) (a) J. Wu, Y. Gu, X. Leng, Q. Shen, *Angew. Chem. Int. Ed.* **2015**, *54*, 7648;  
(b) G. Danoun, B. Bayarmagnai, M. F. Gruenberg, L. J. Goossen, *Chem. Sci.* **2014**, *5*, 1312.

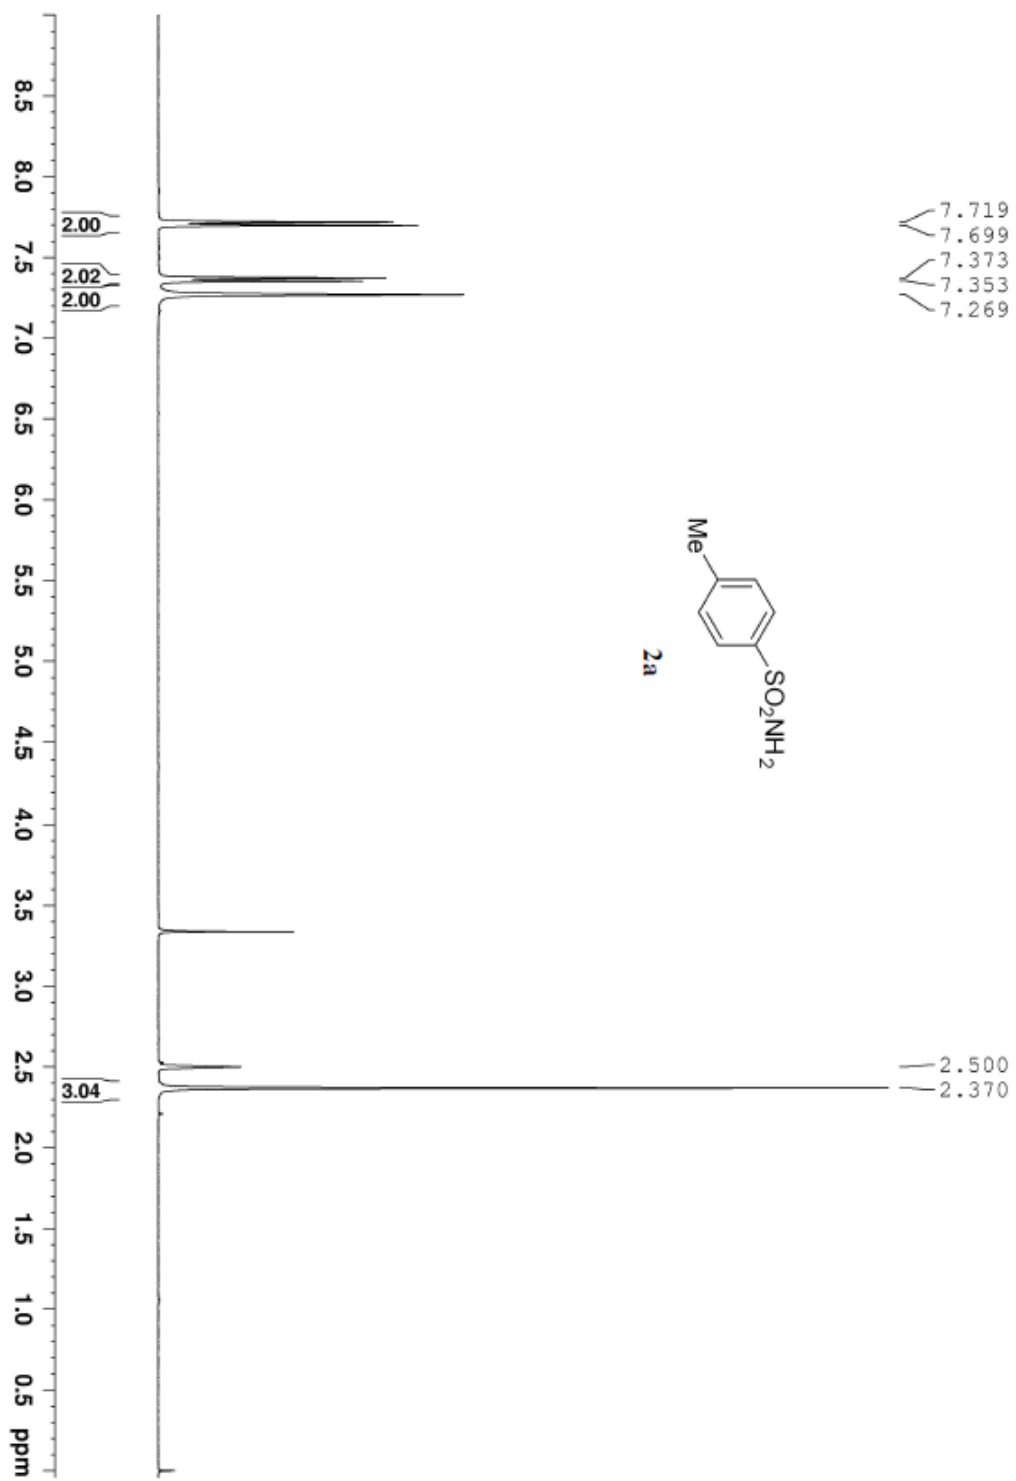

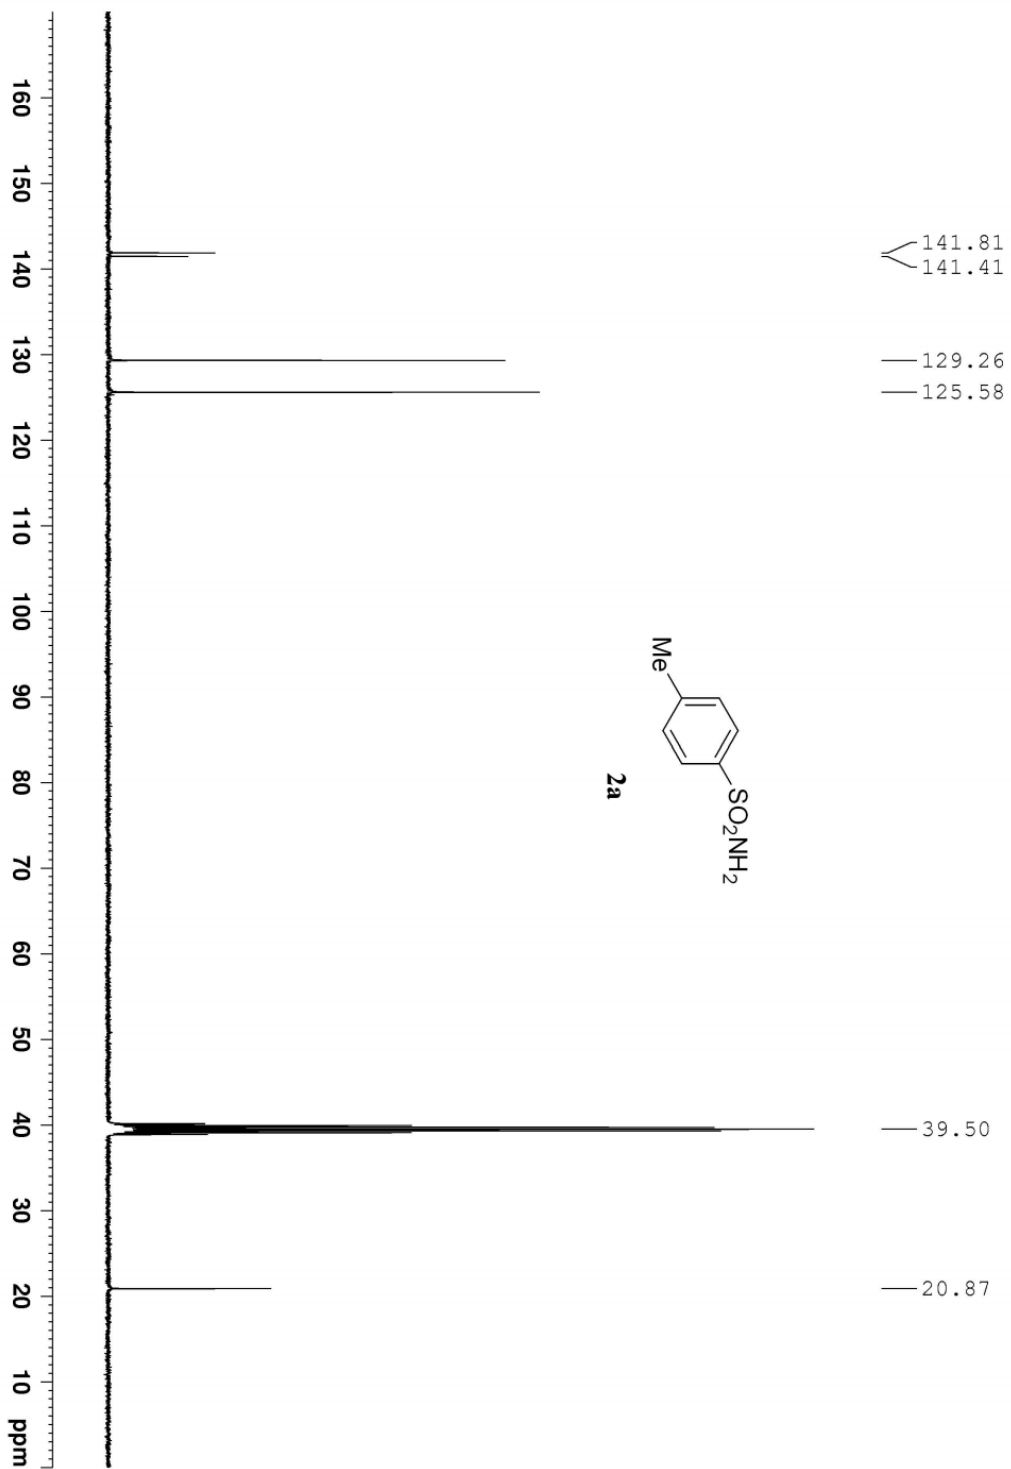

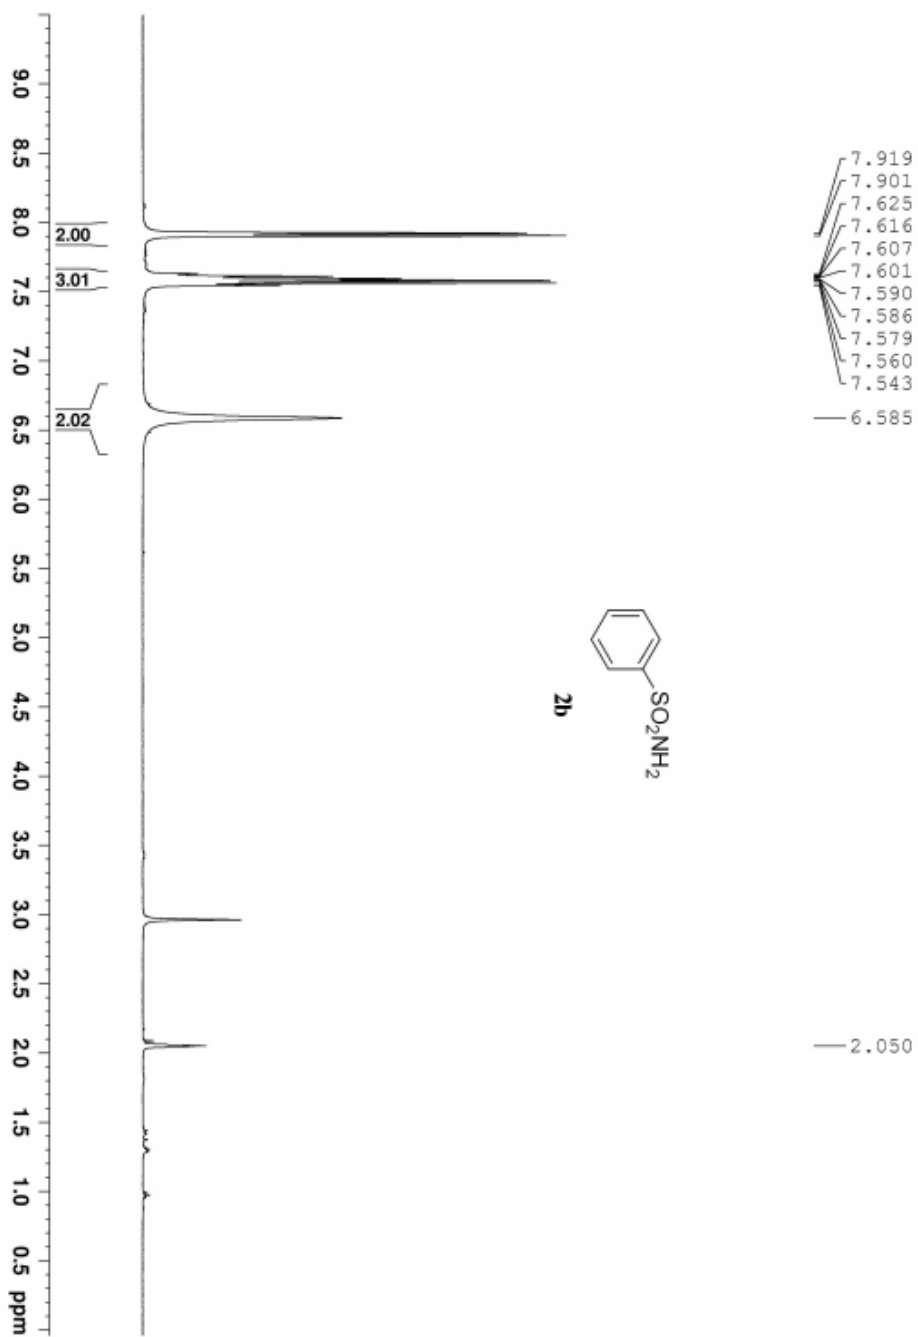

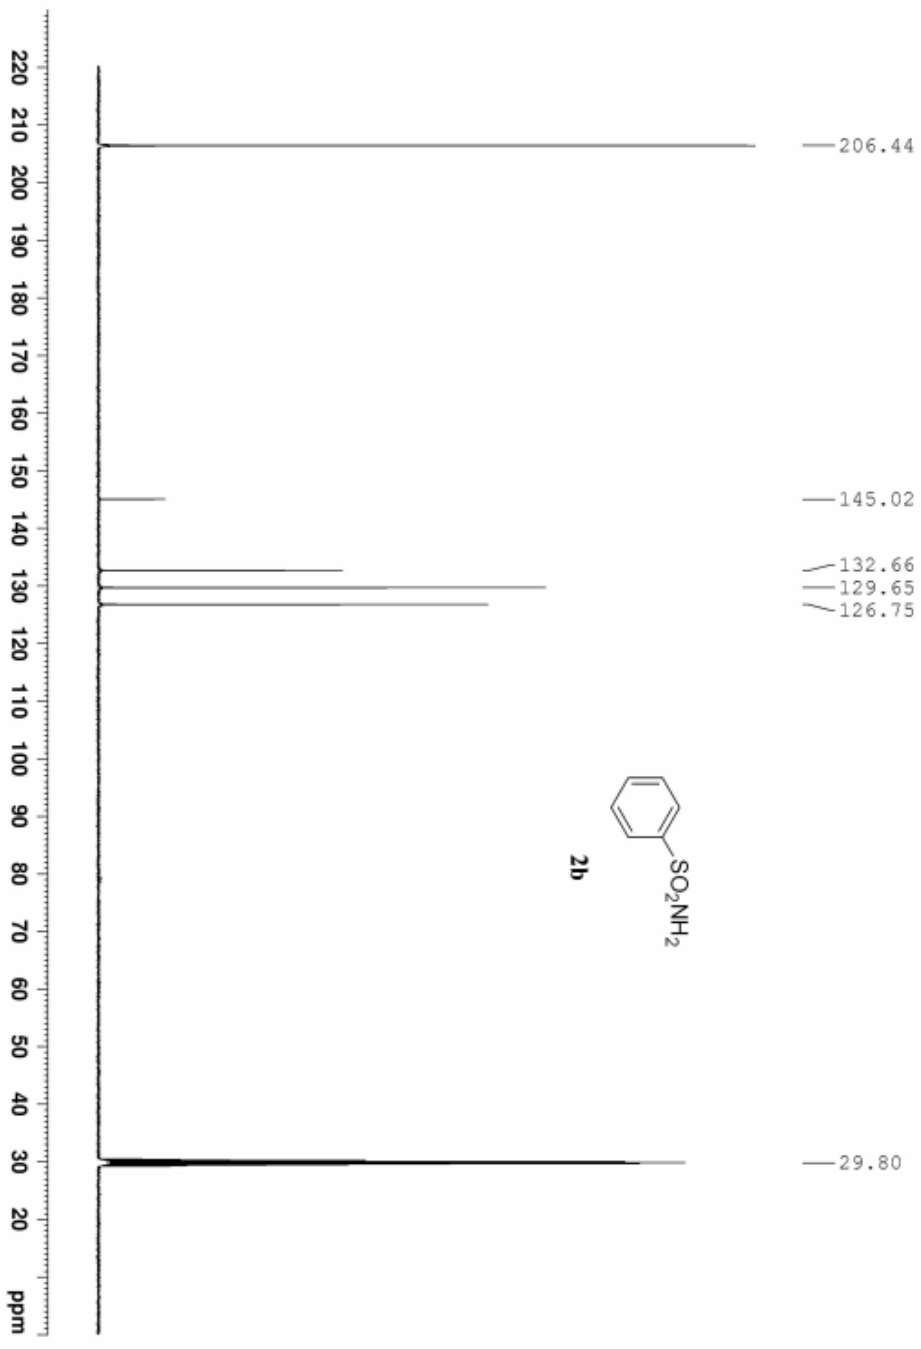

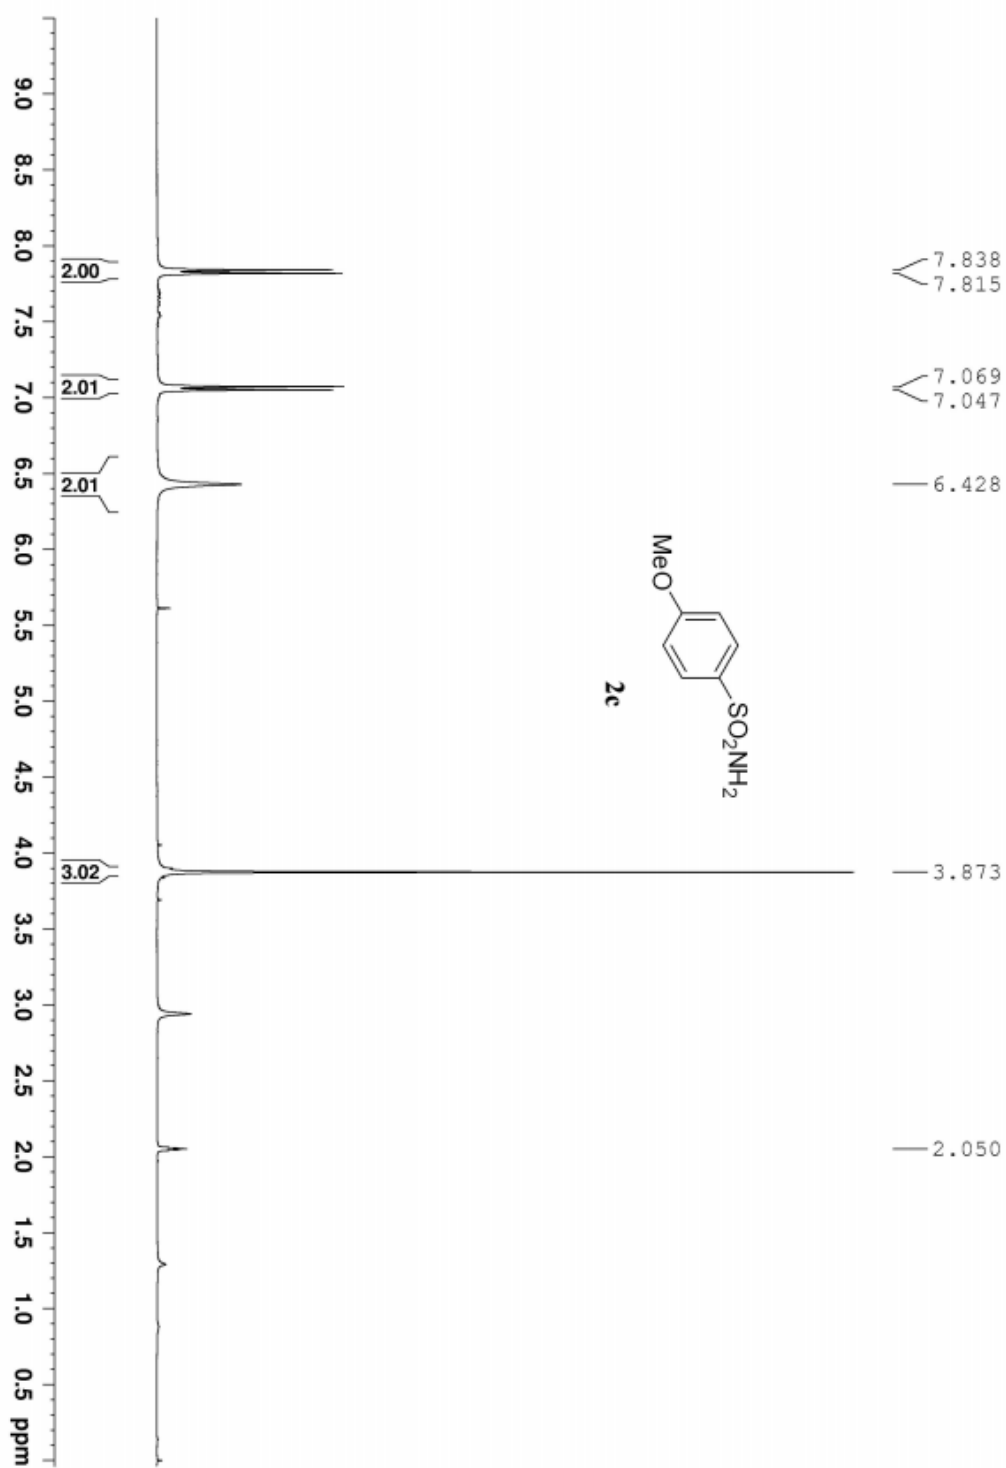

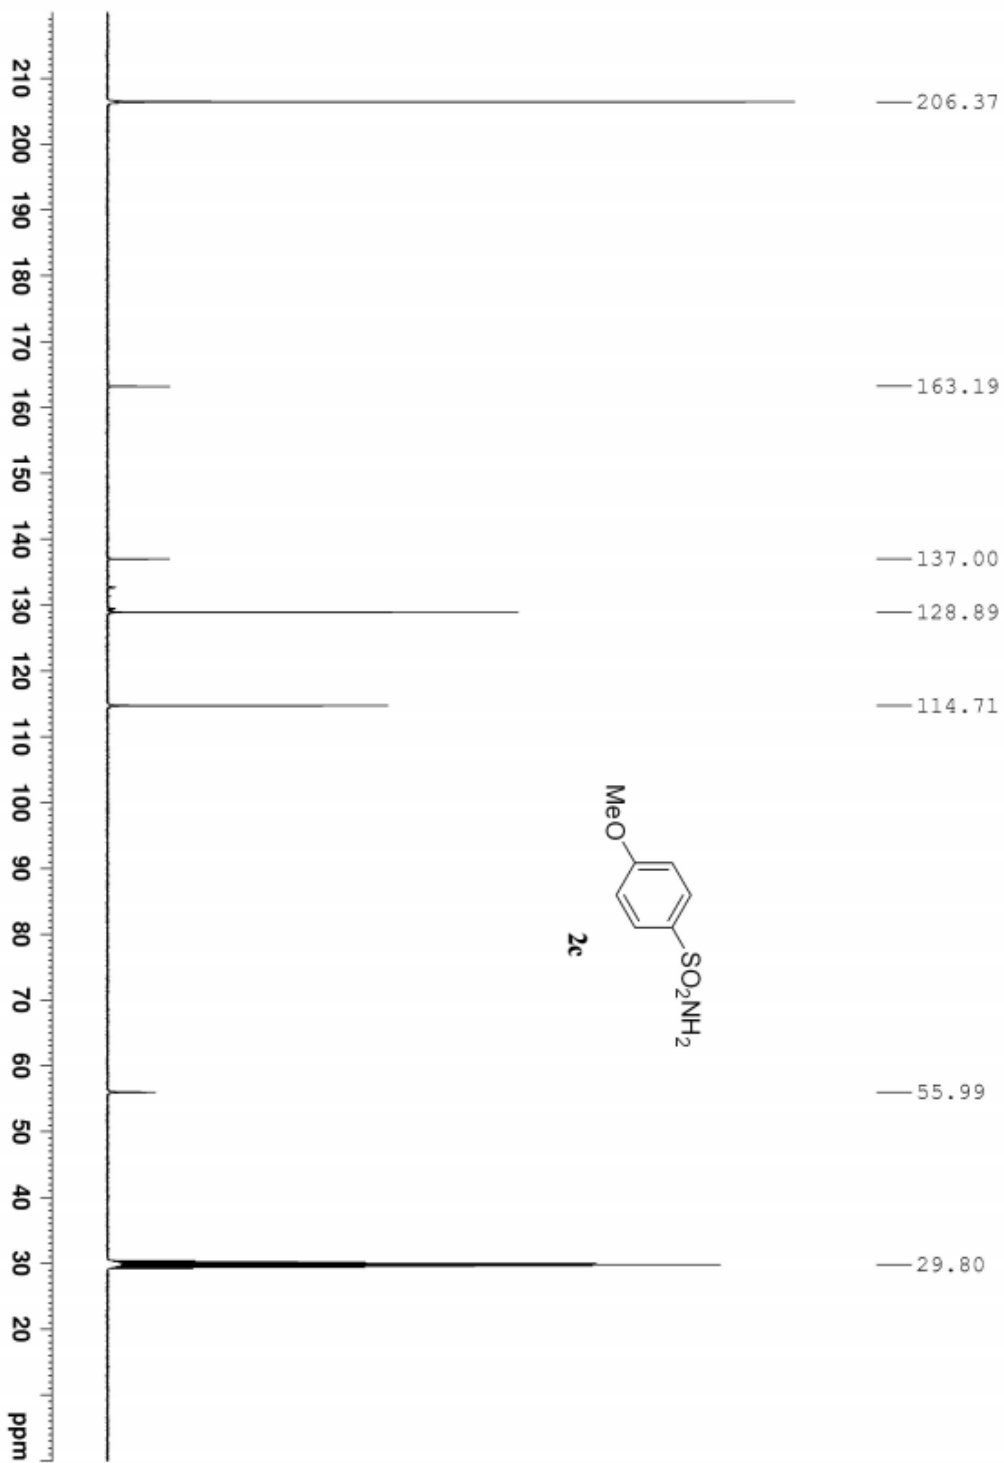

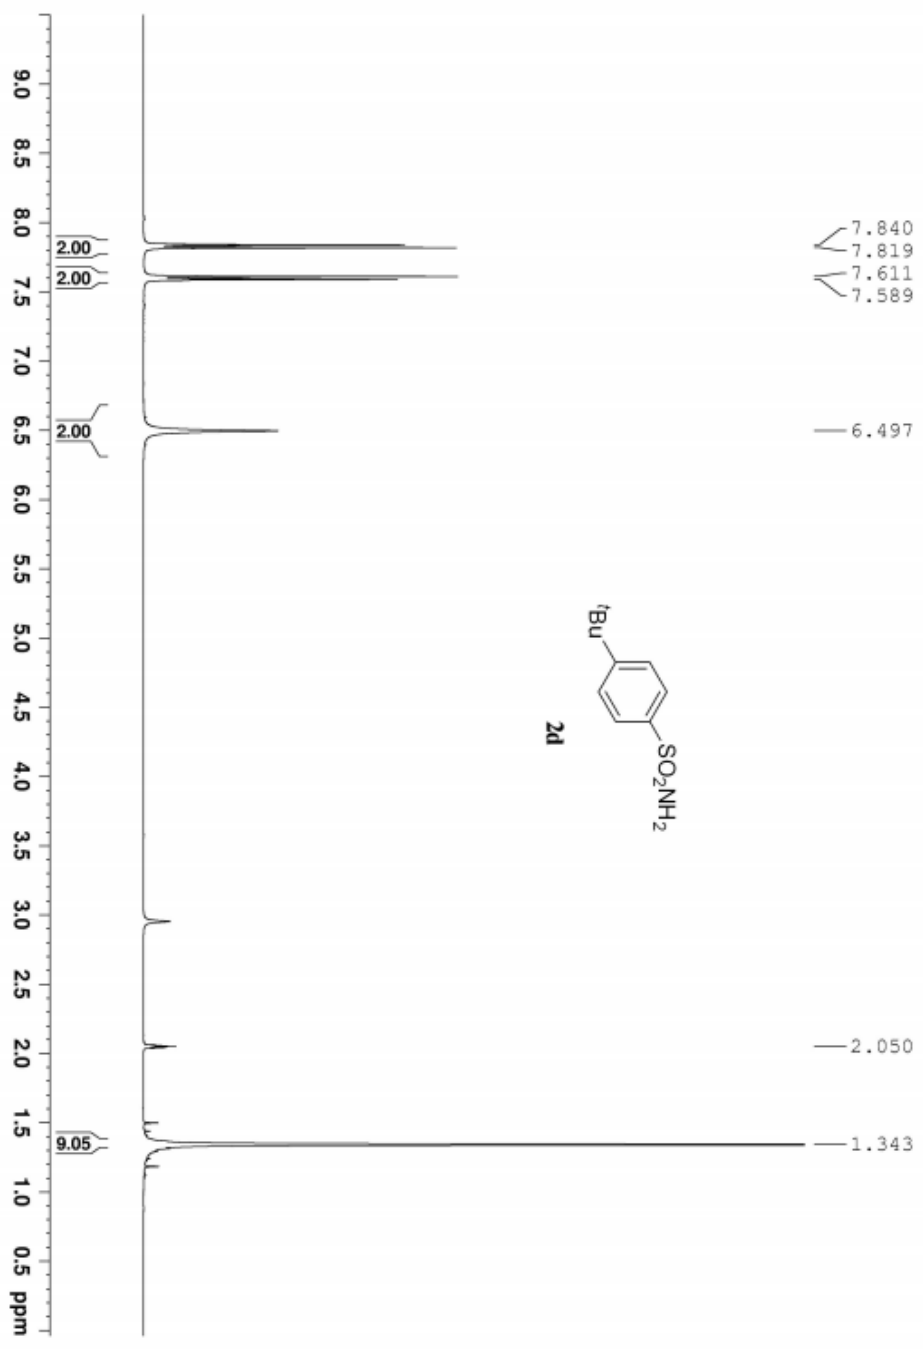



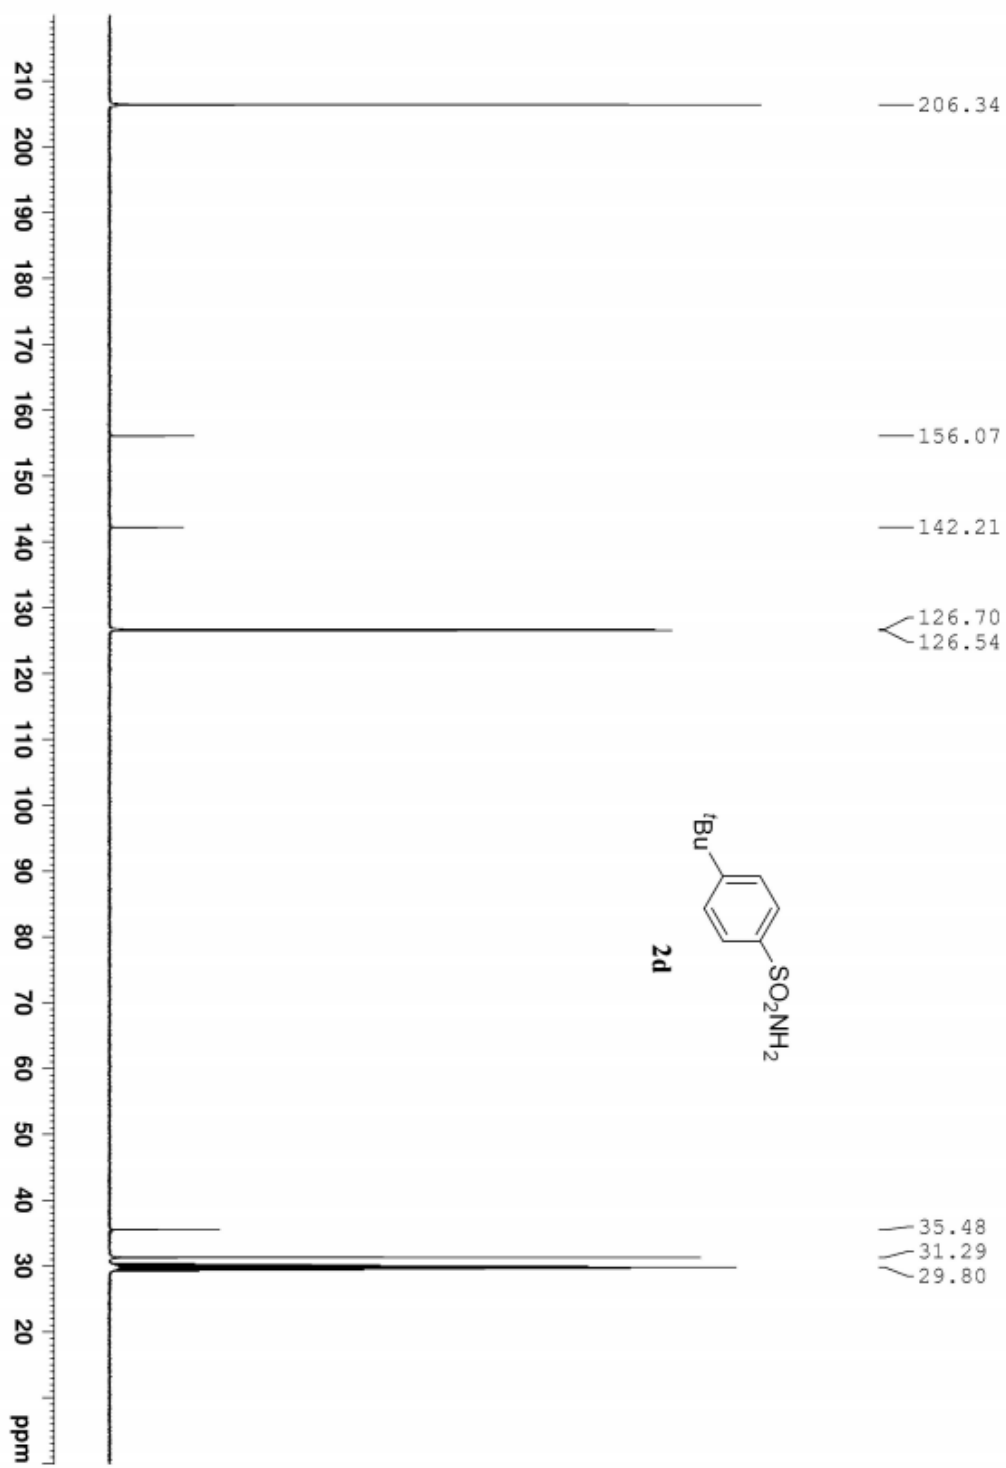

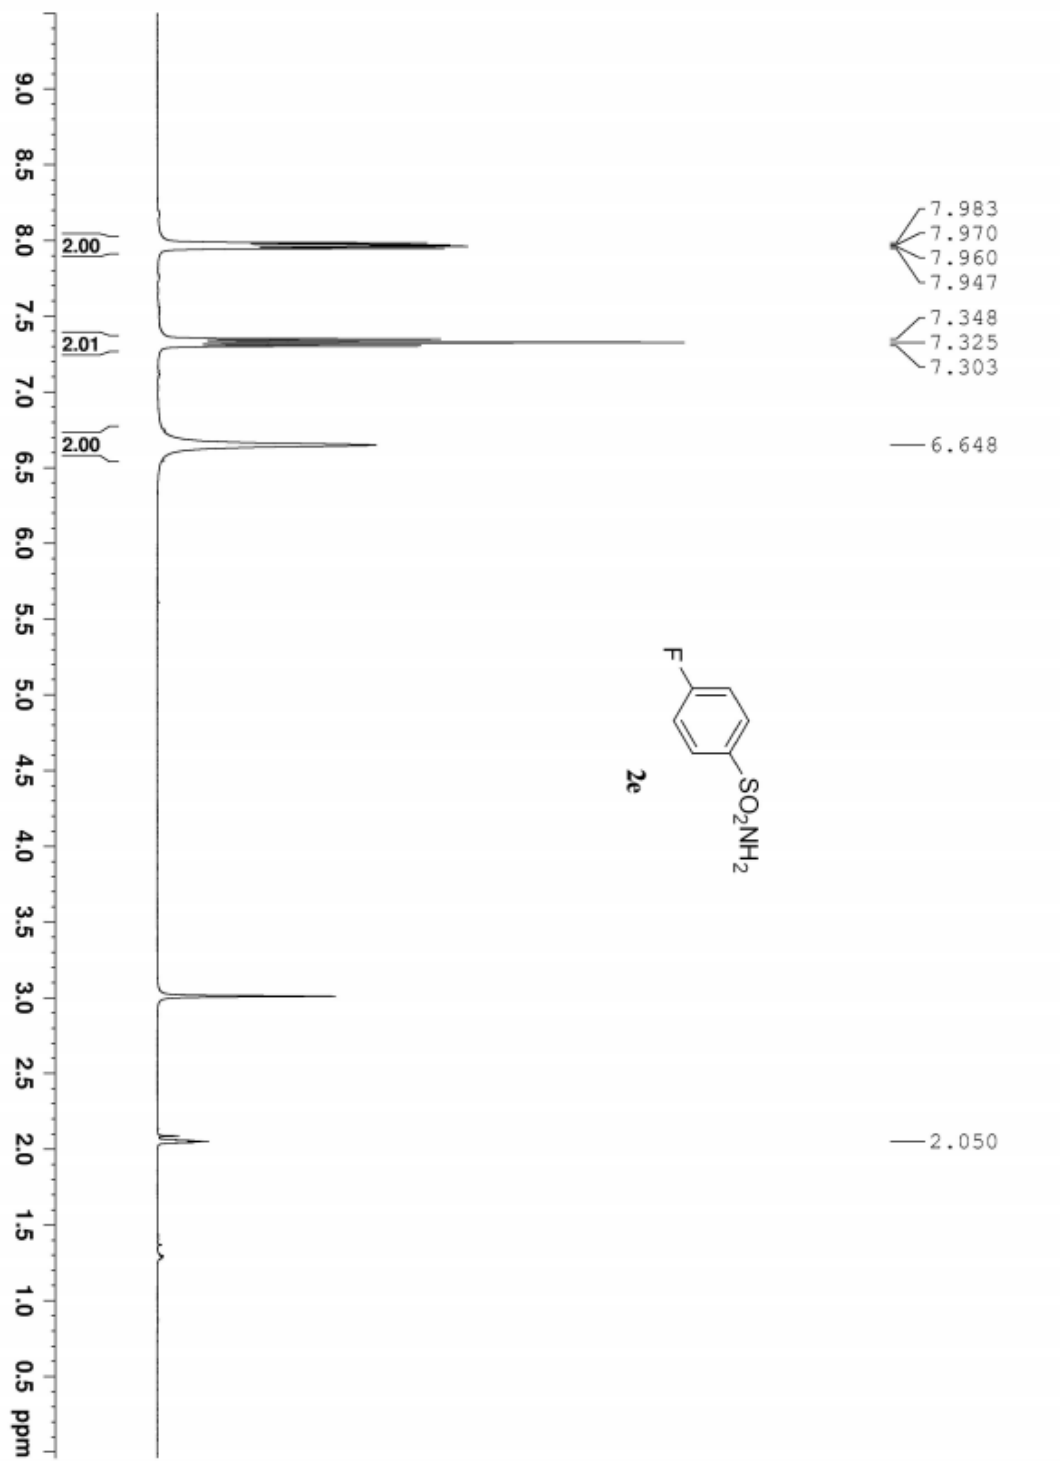

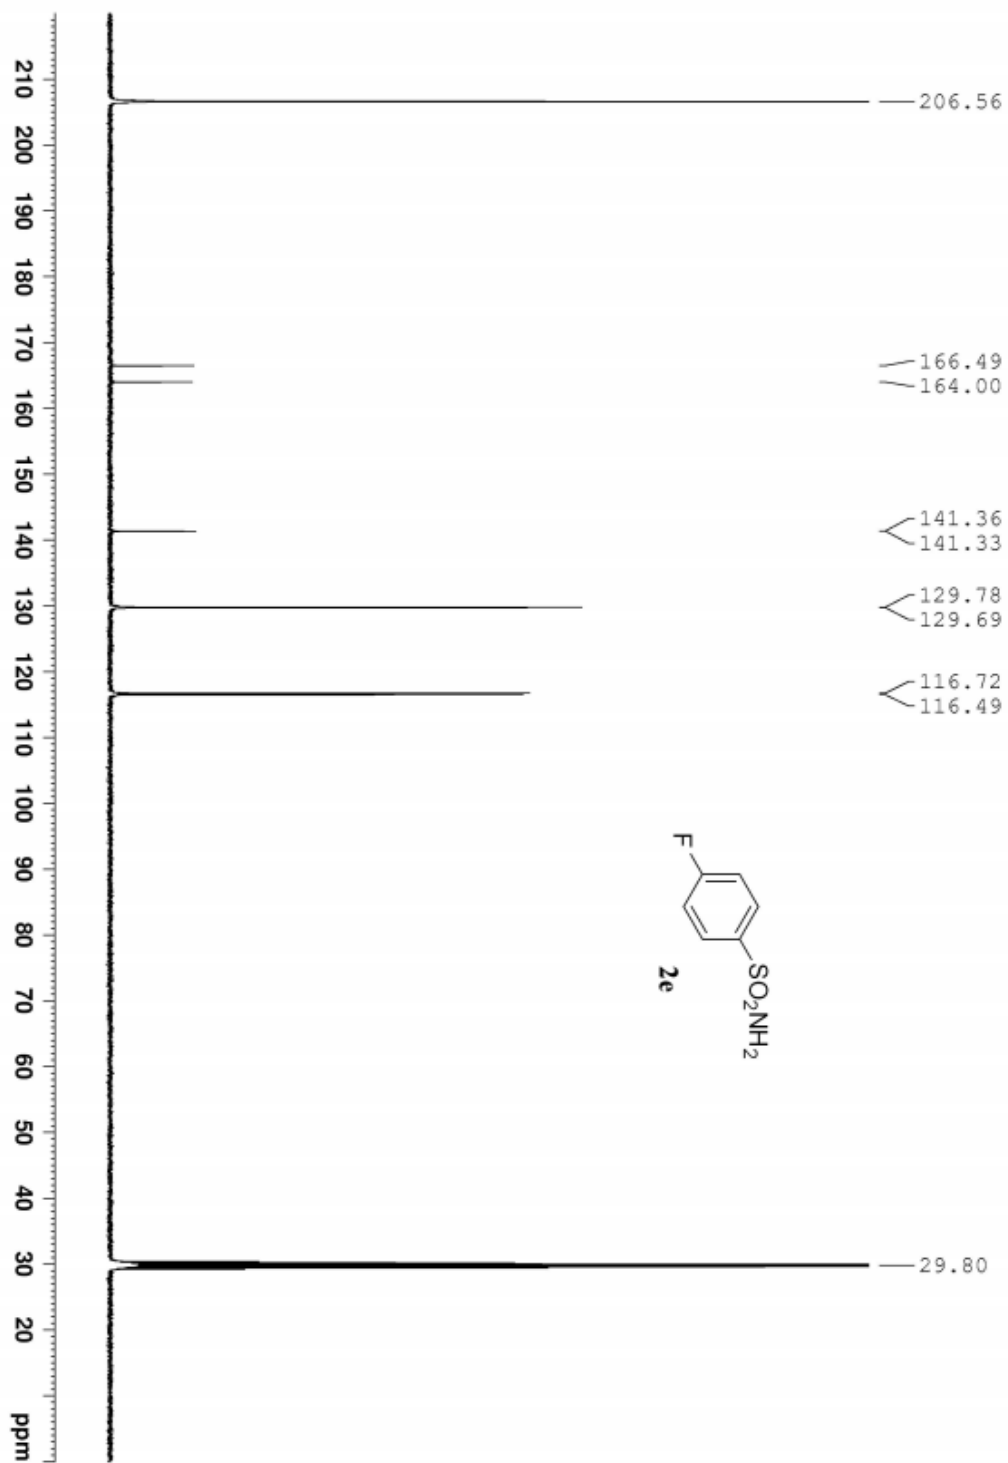

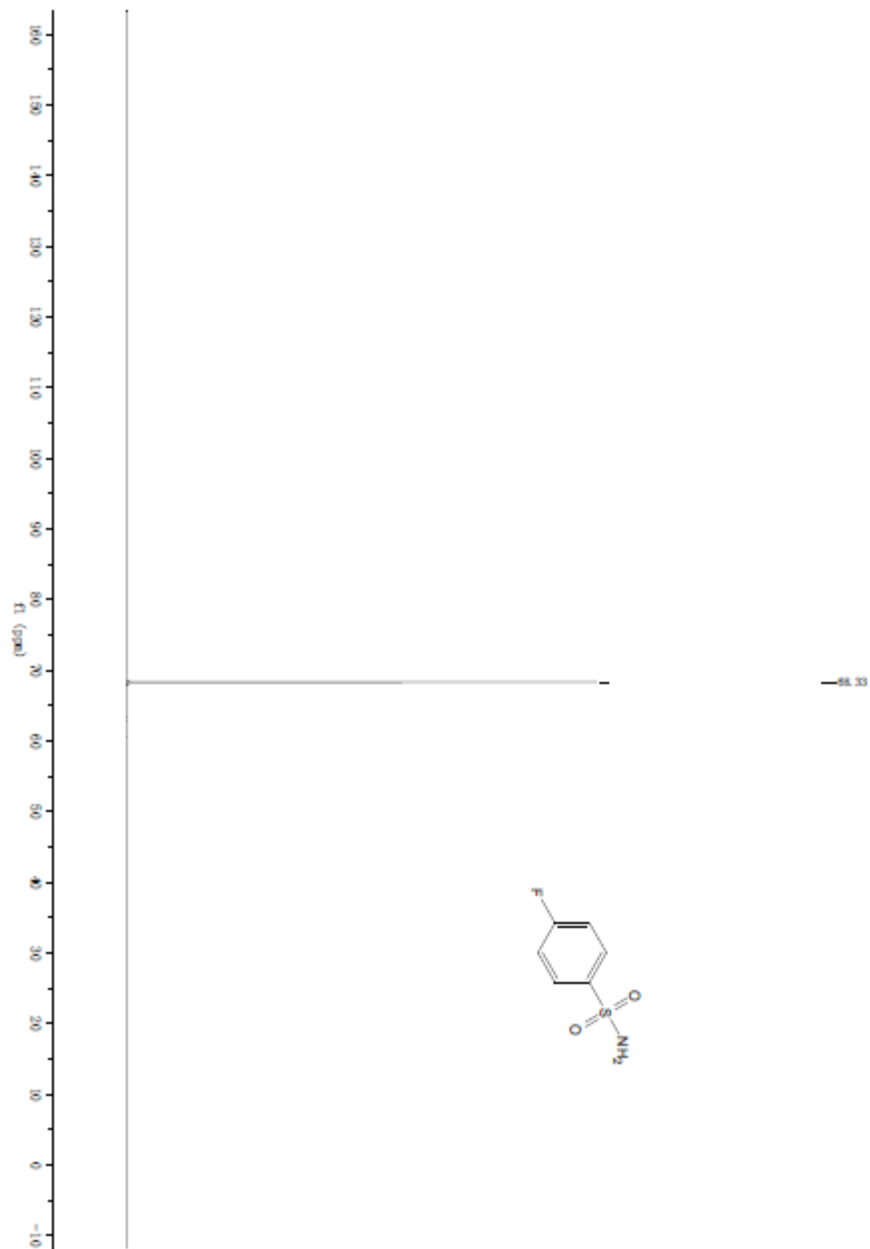

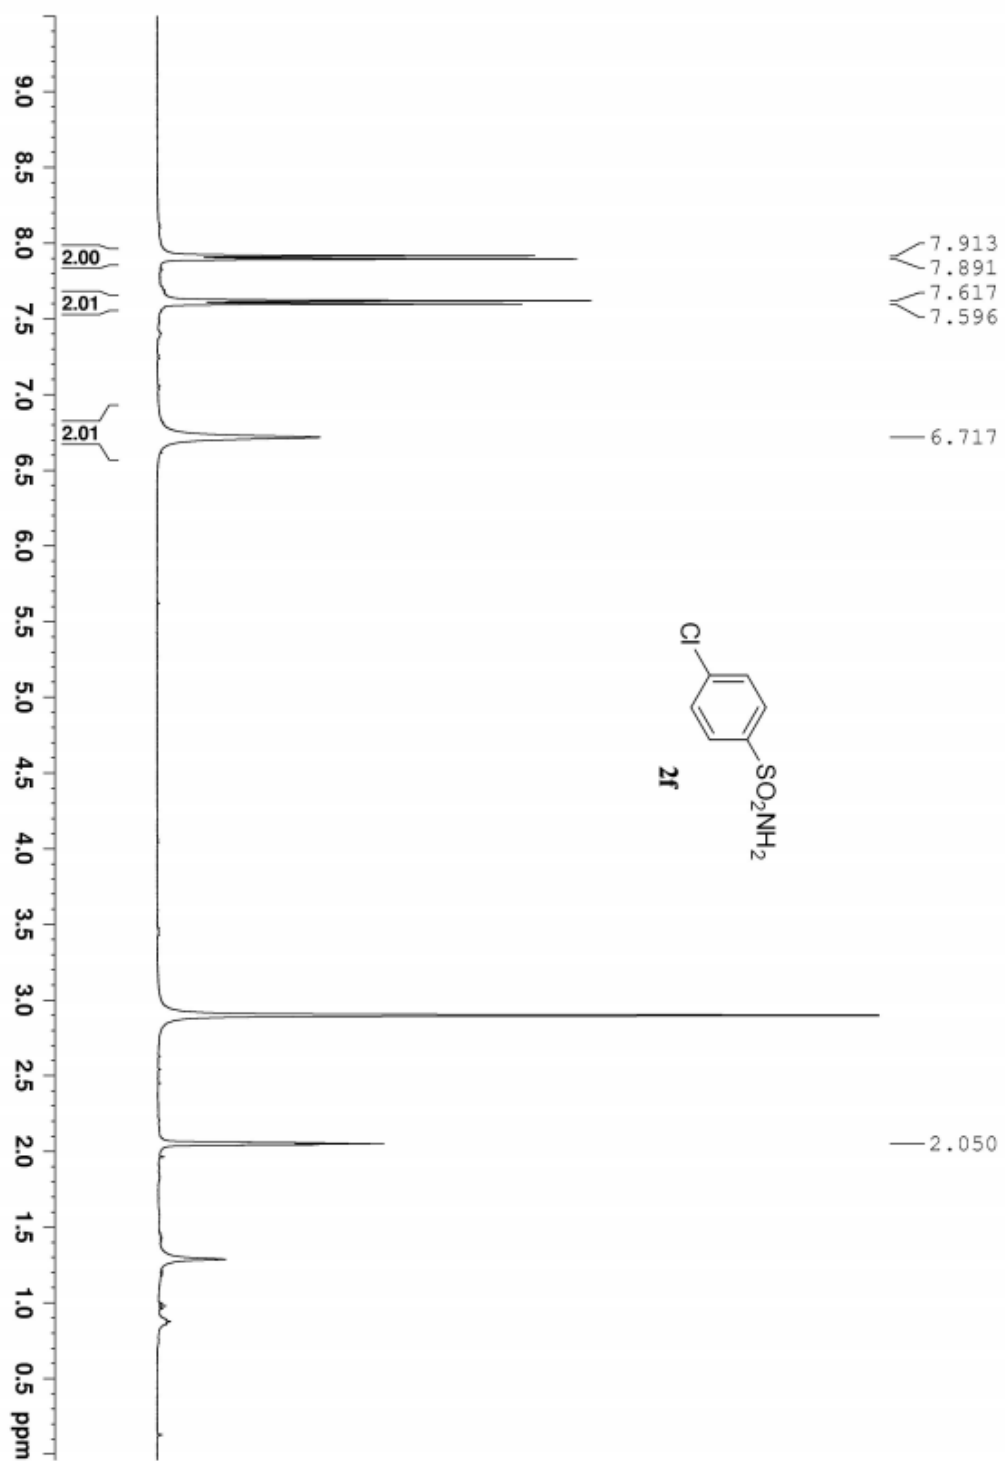

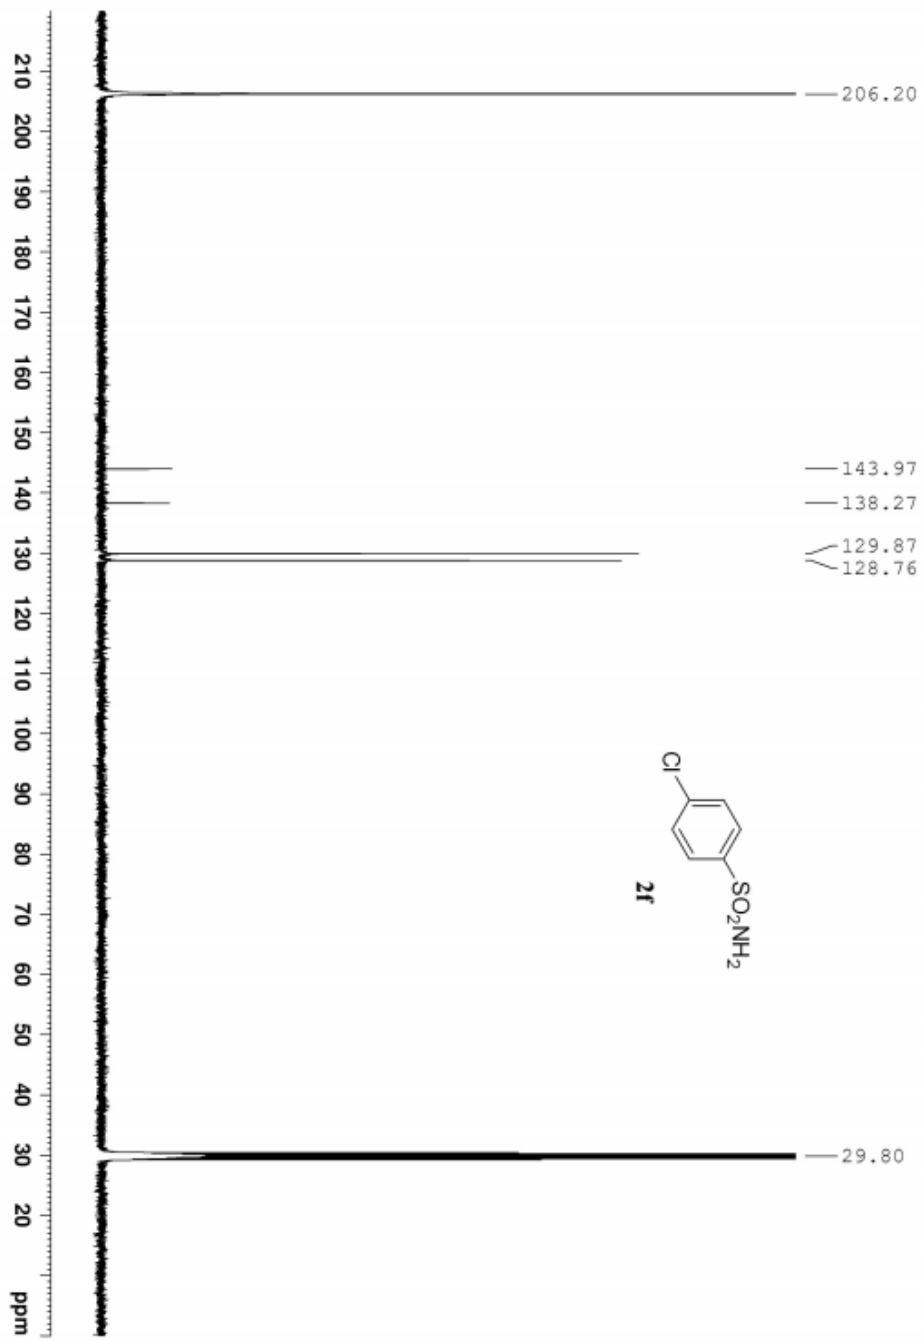

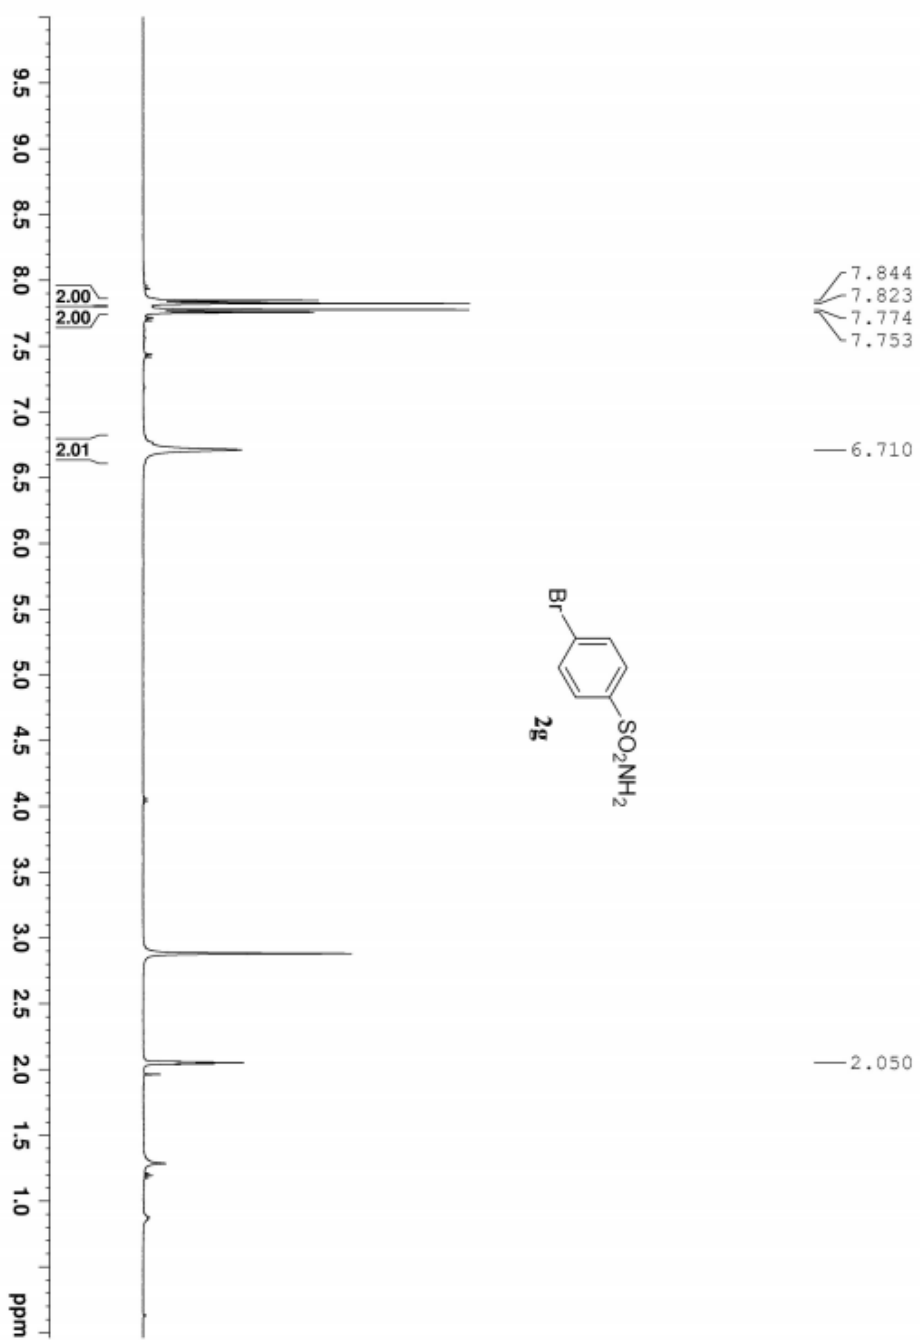

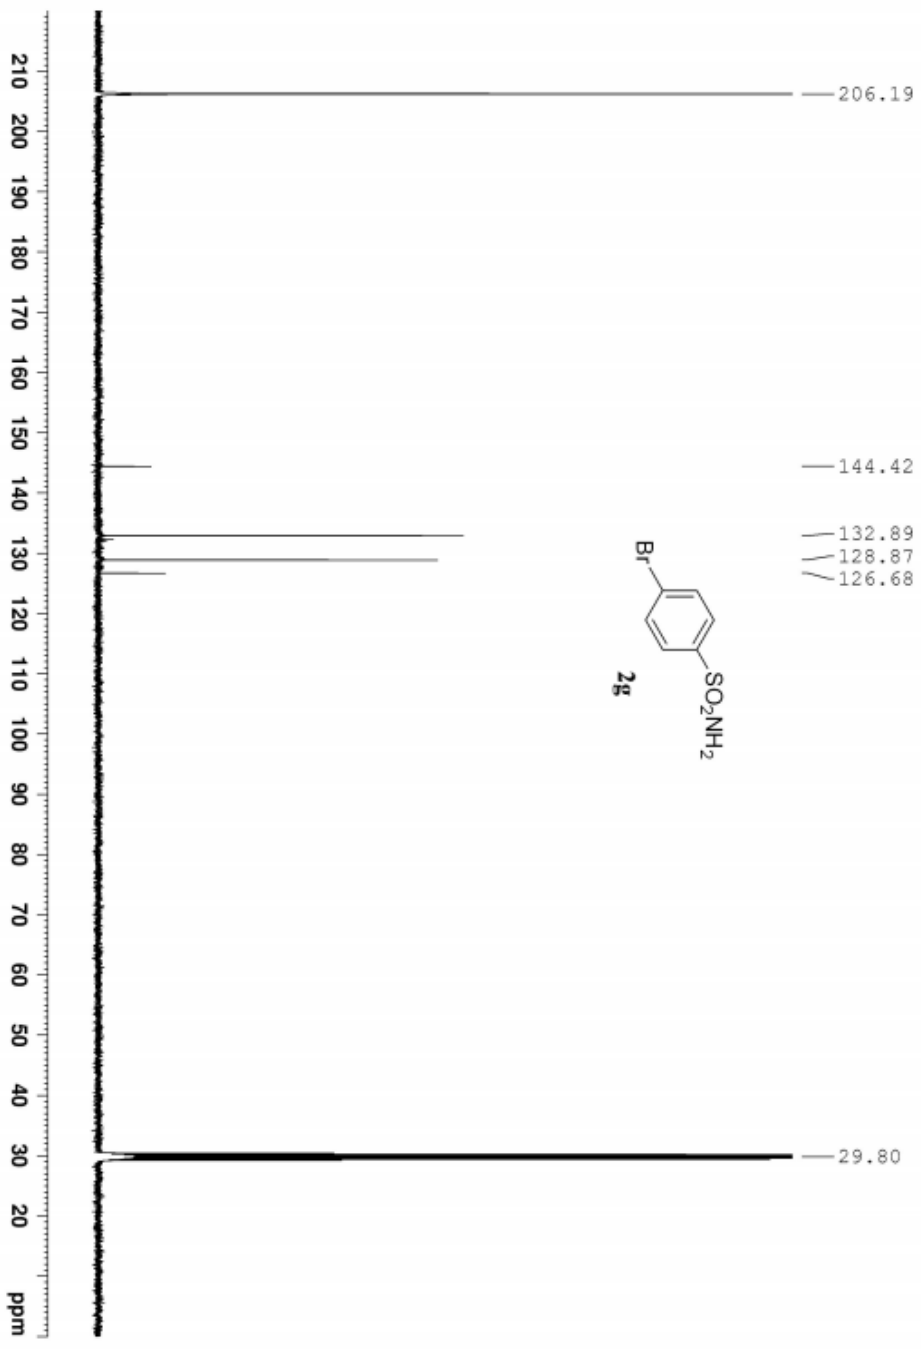



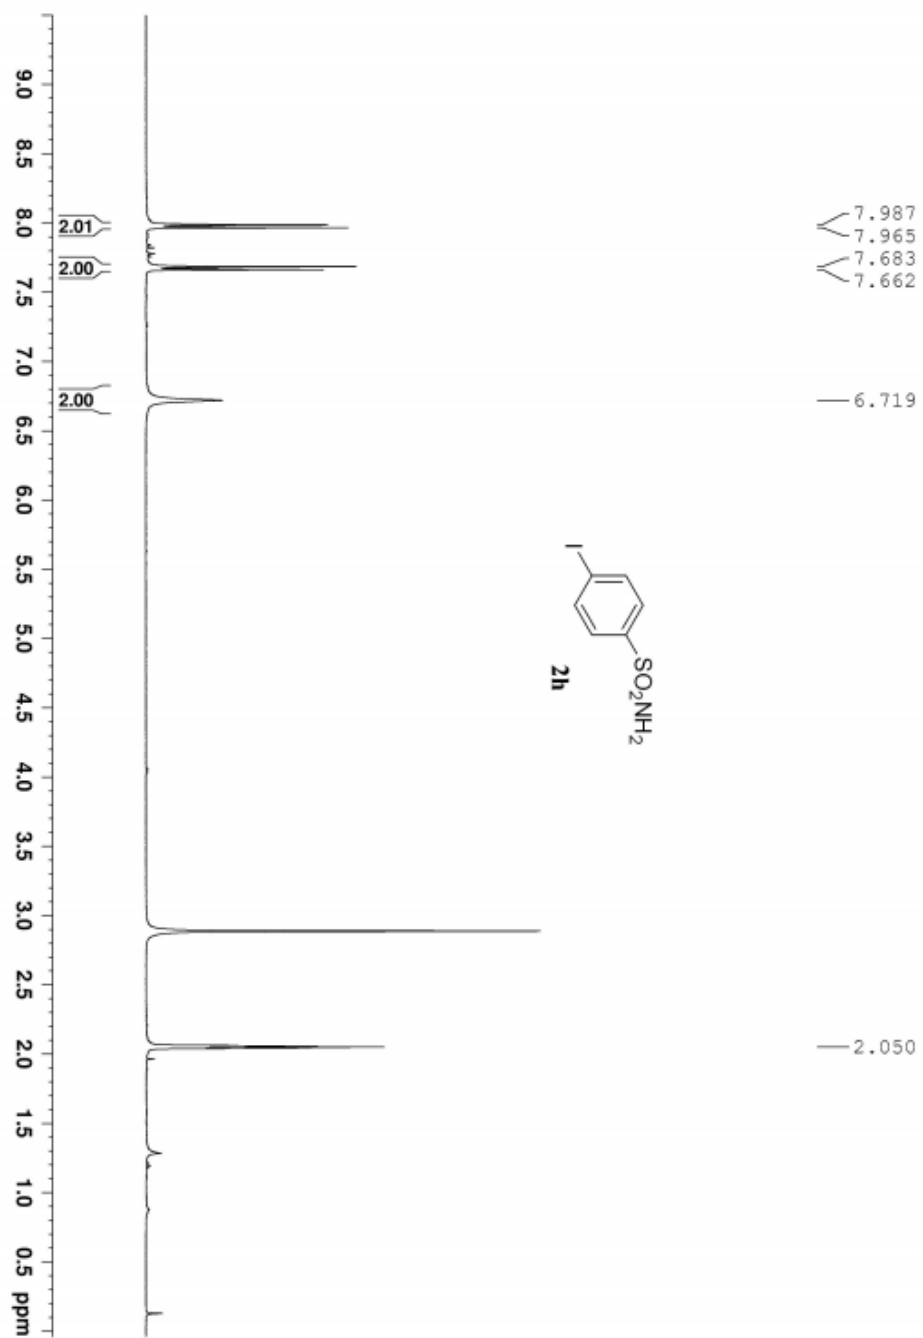

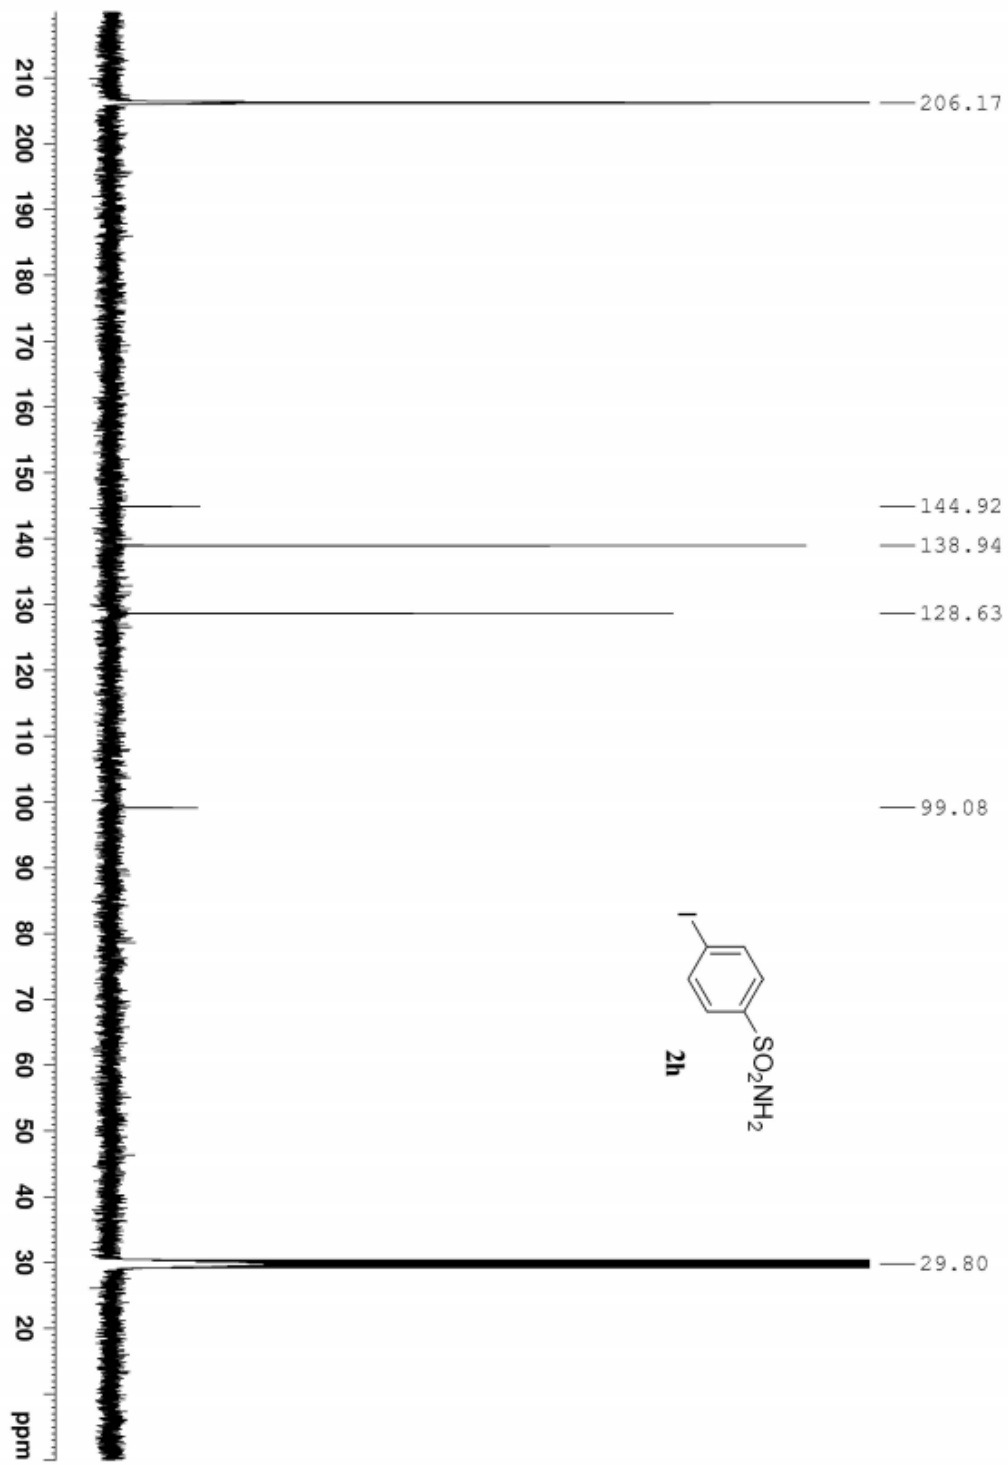

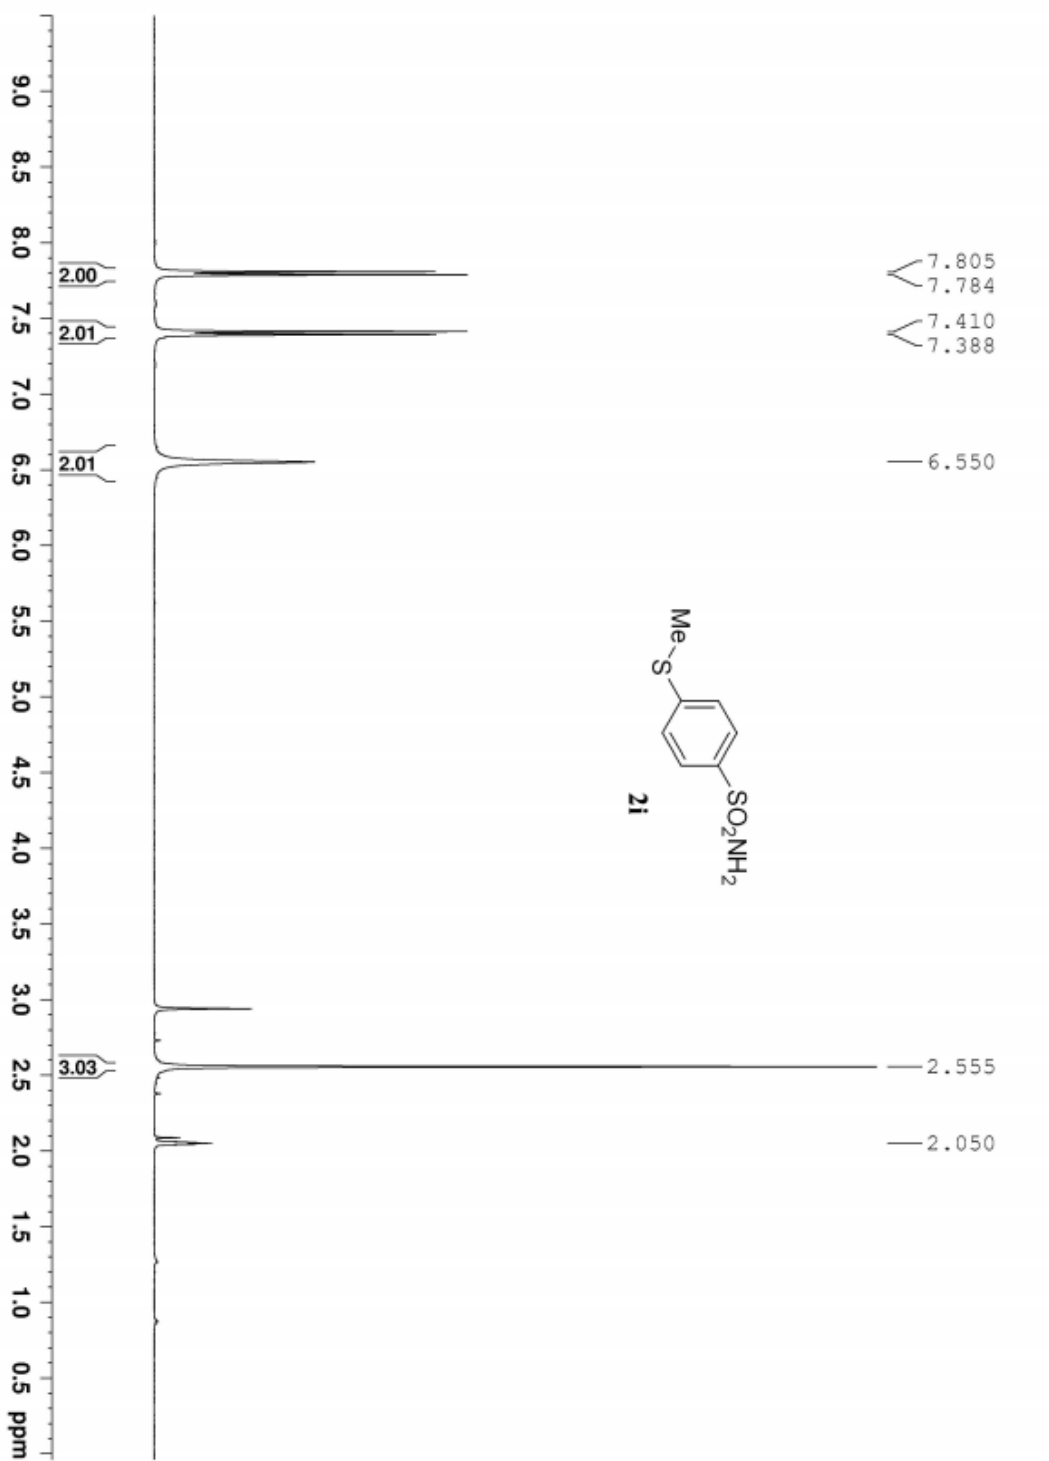

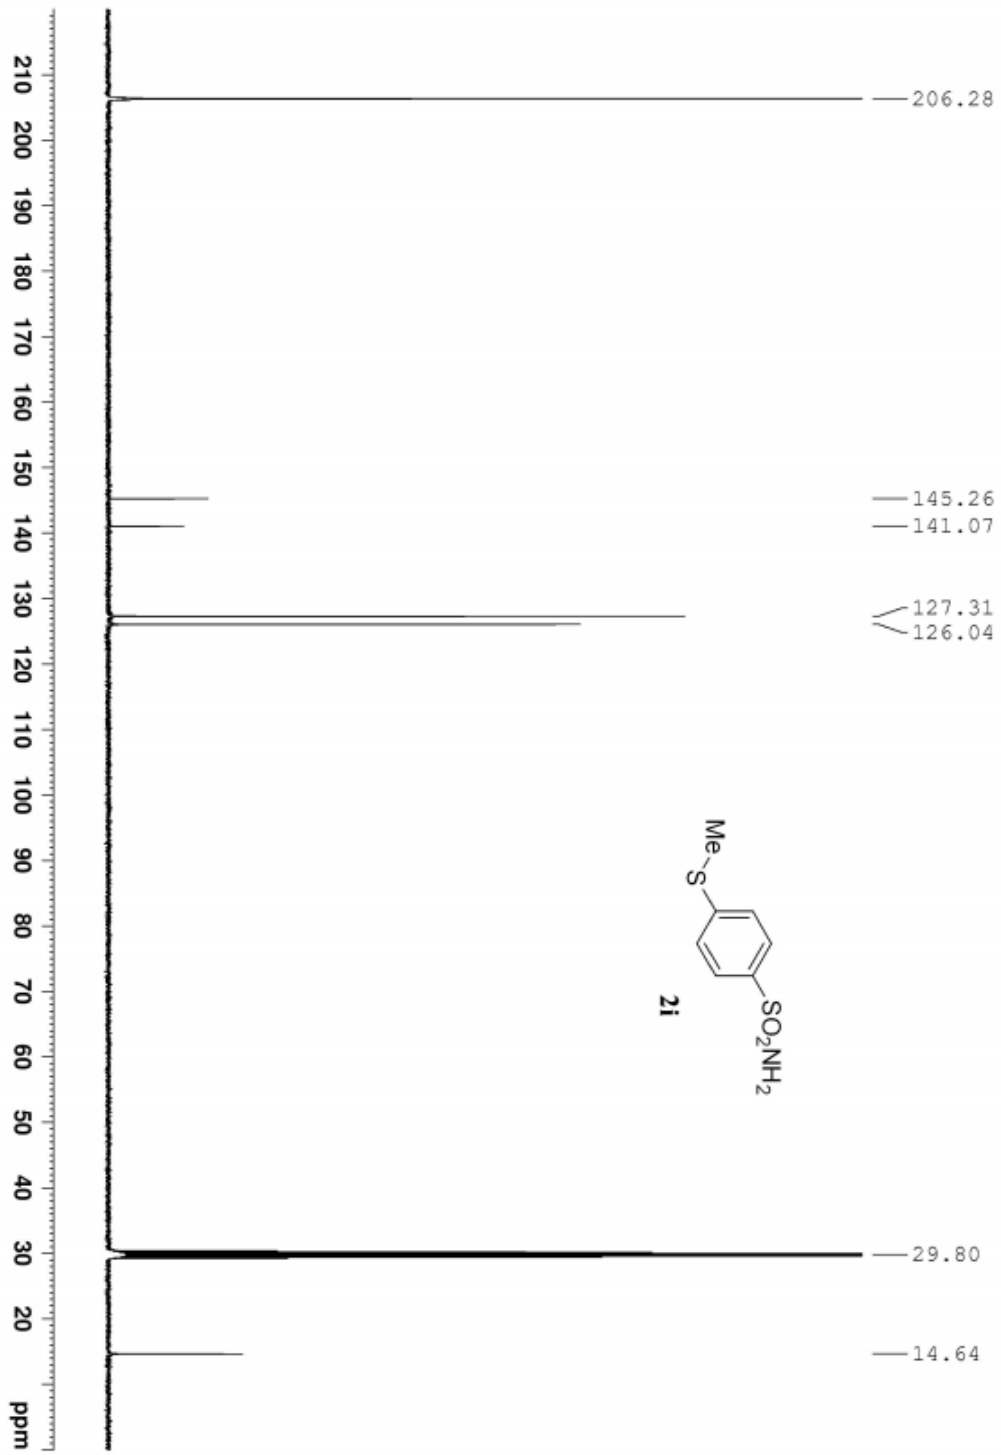

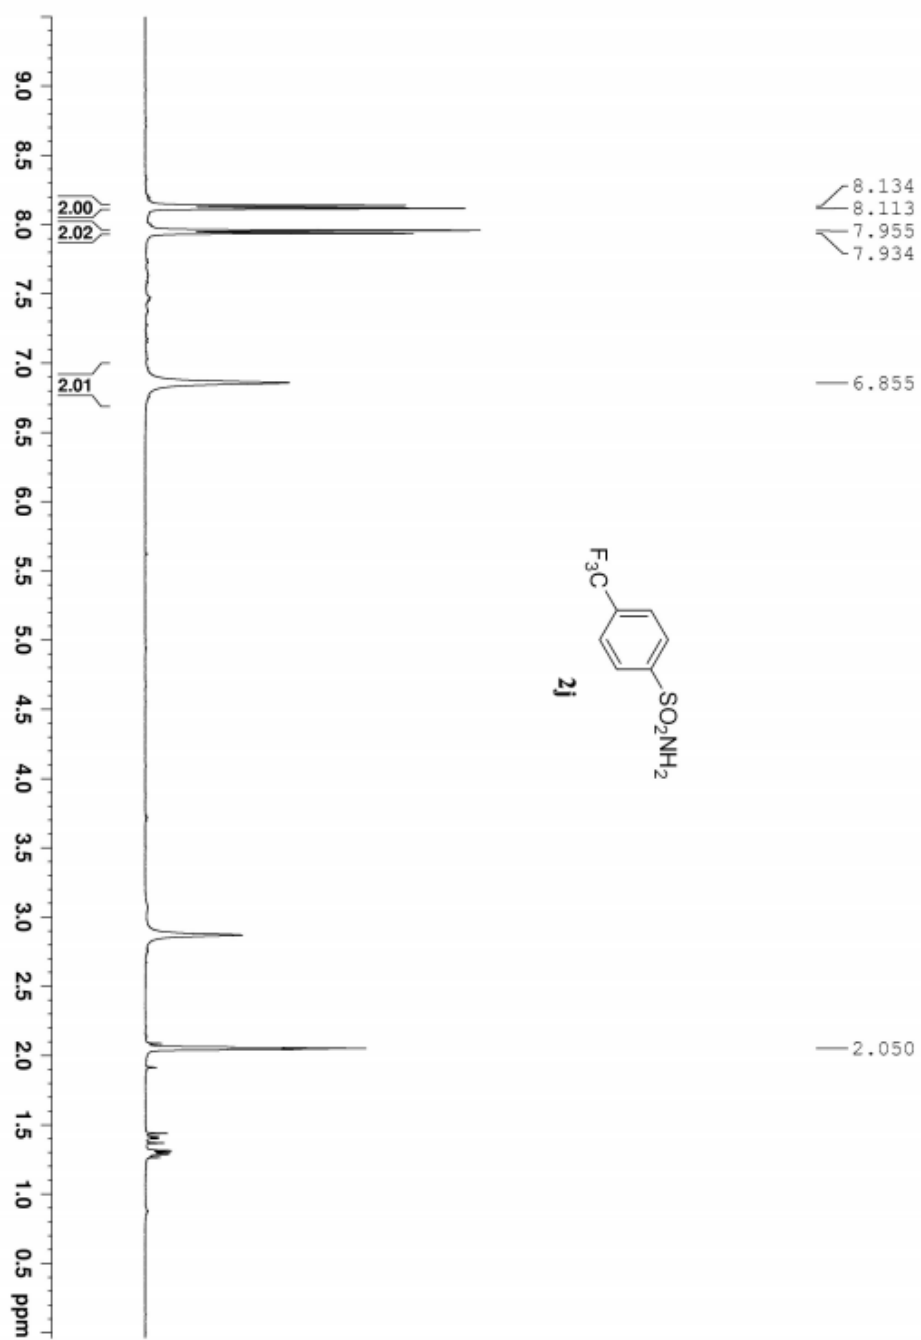

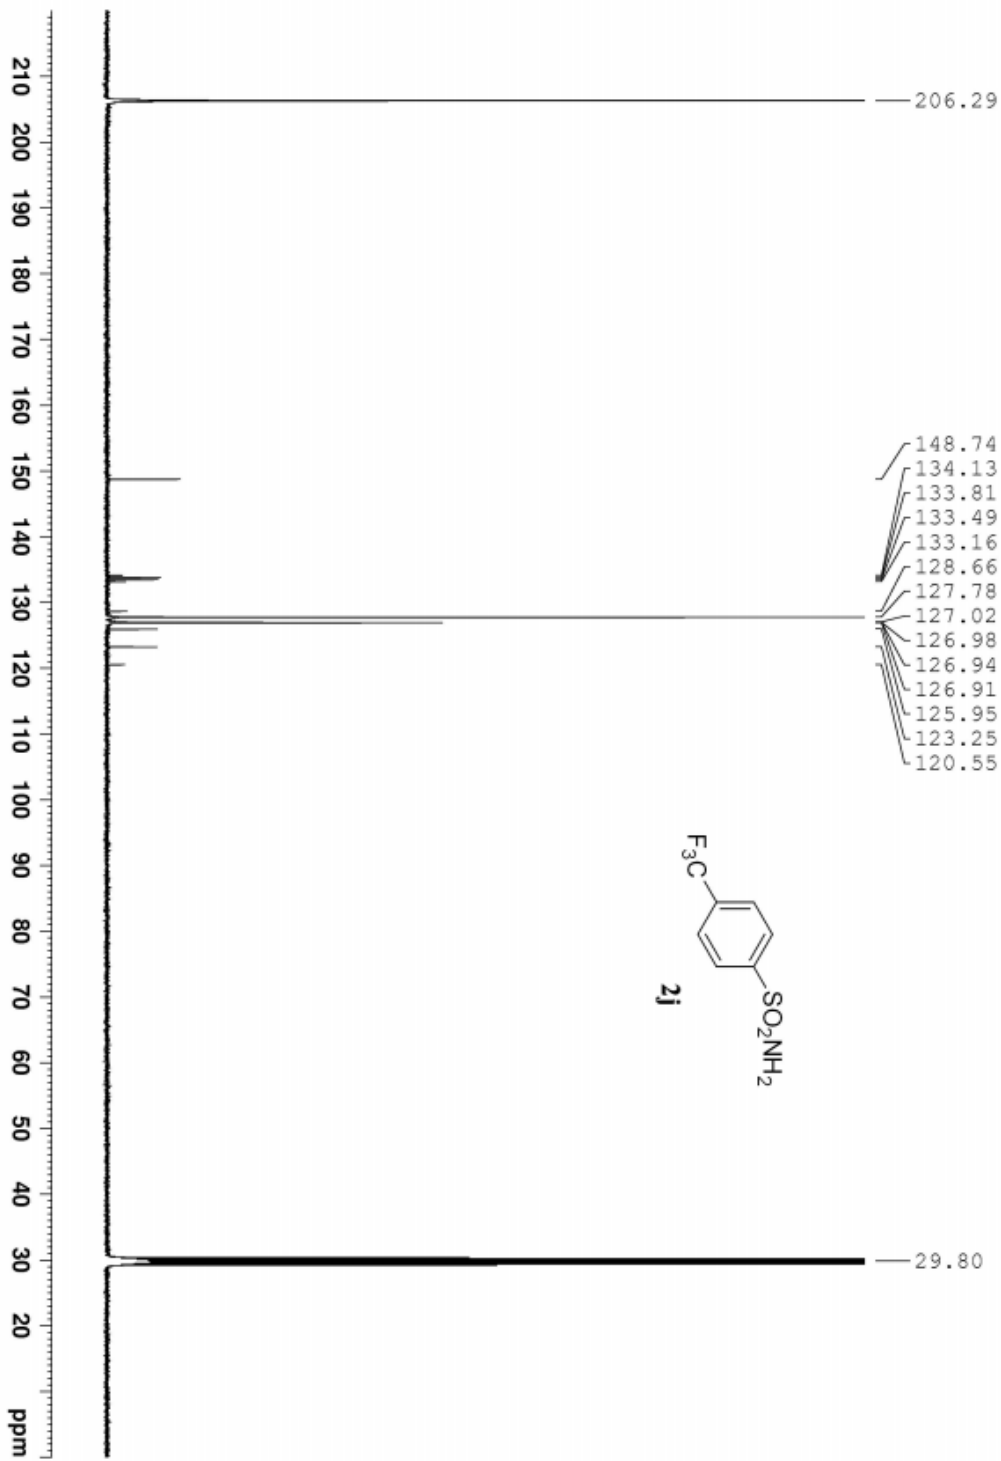

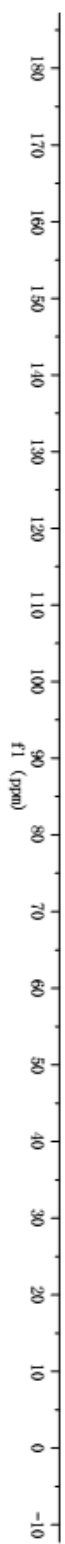

—113.97

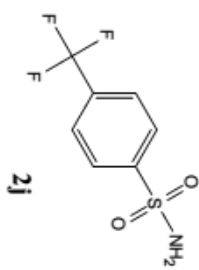

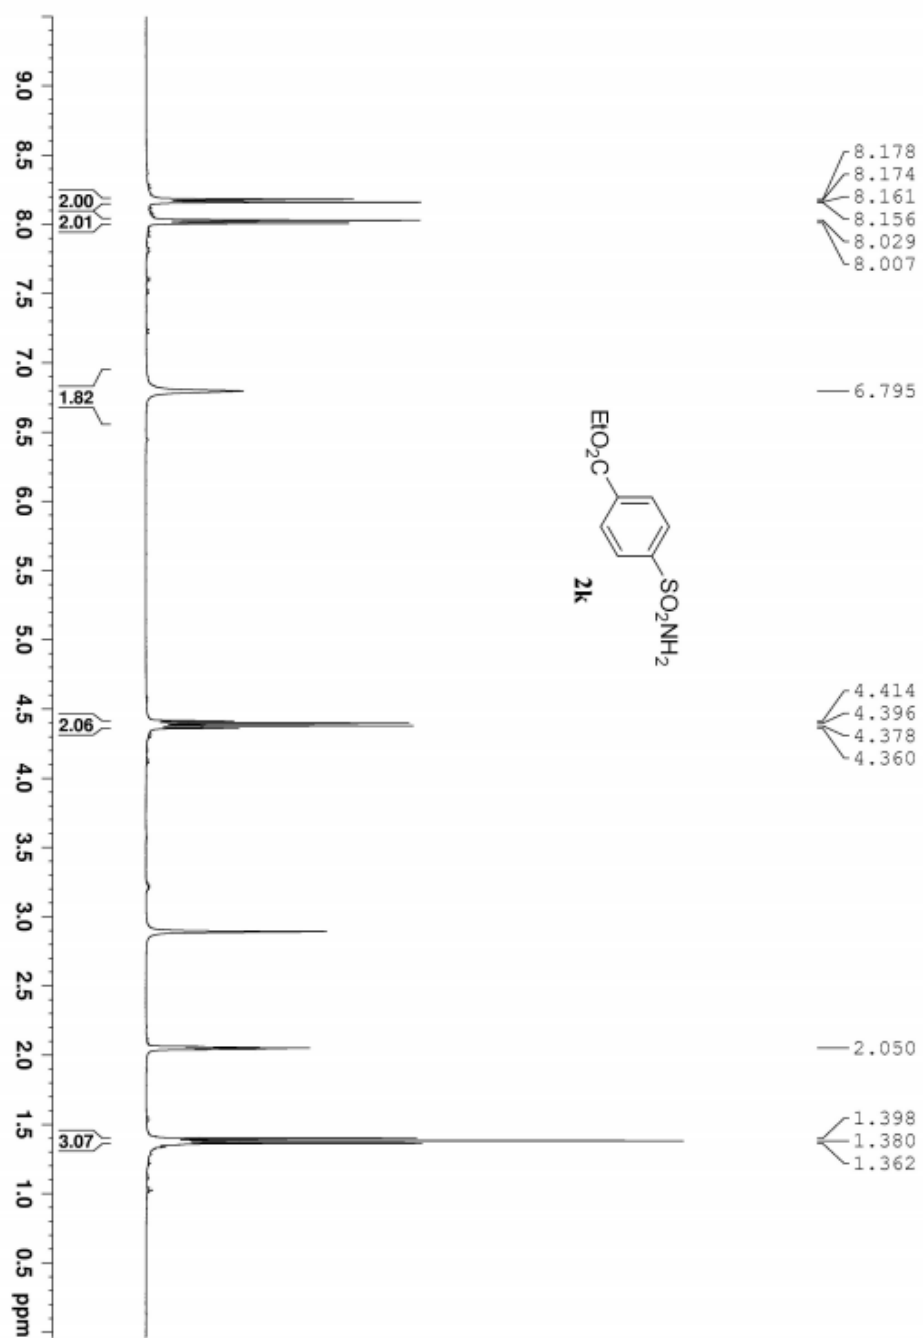



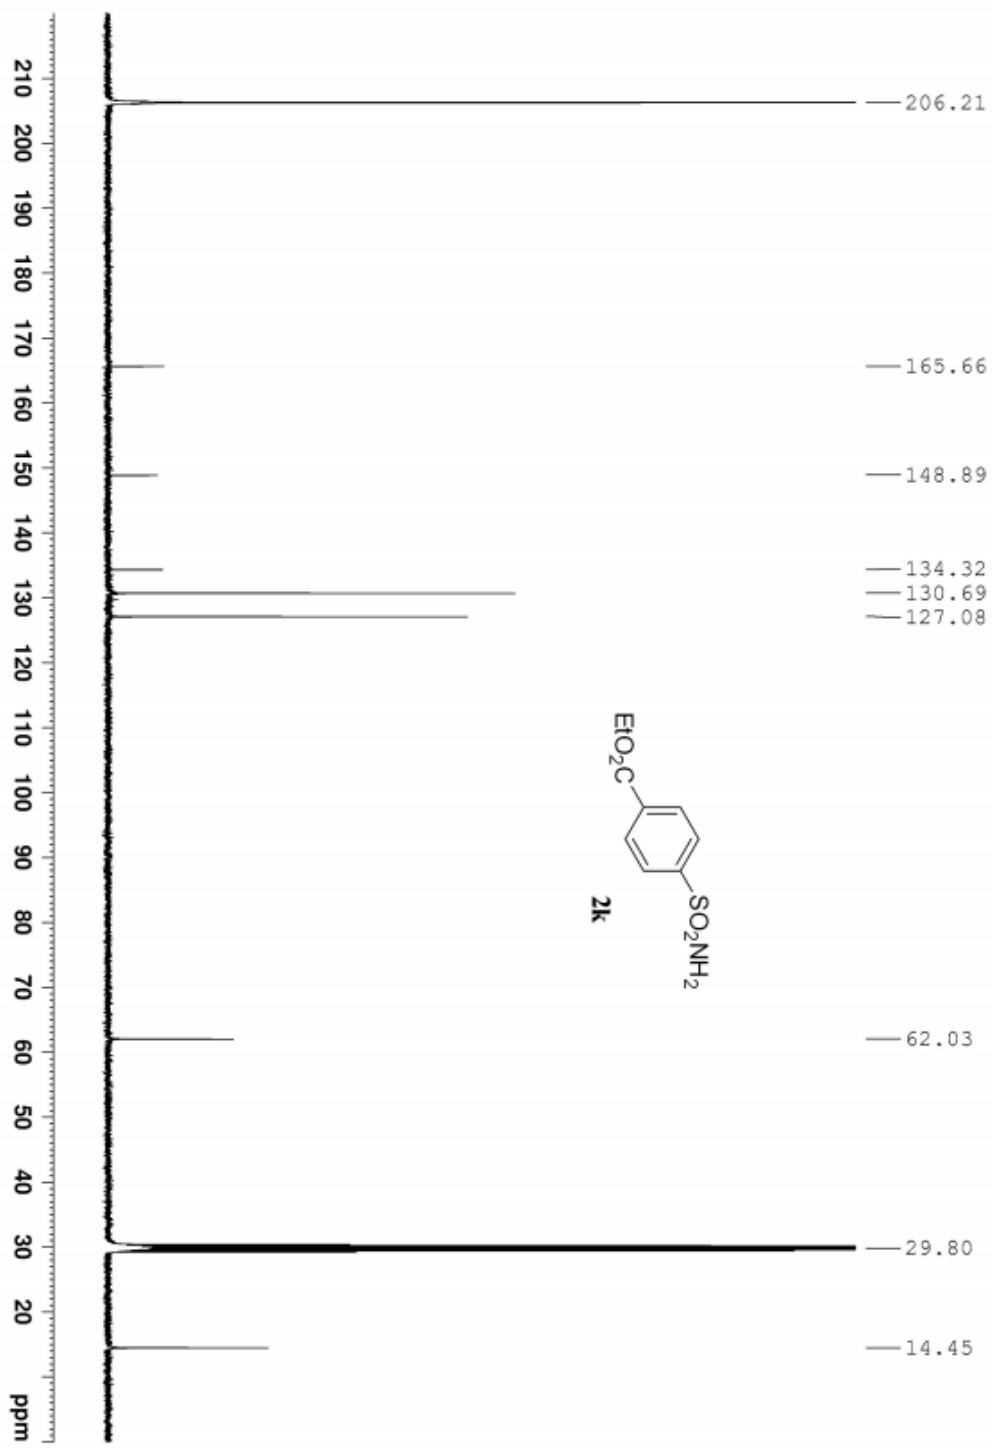

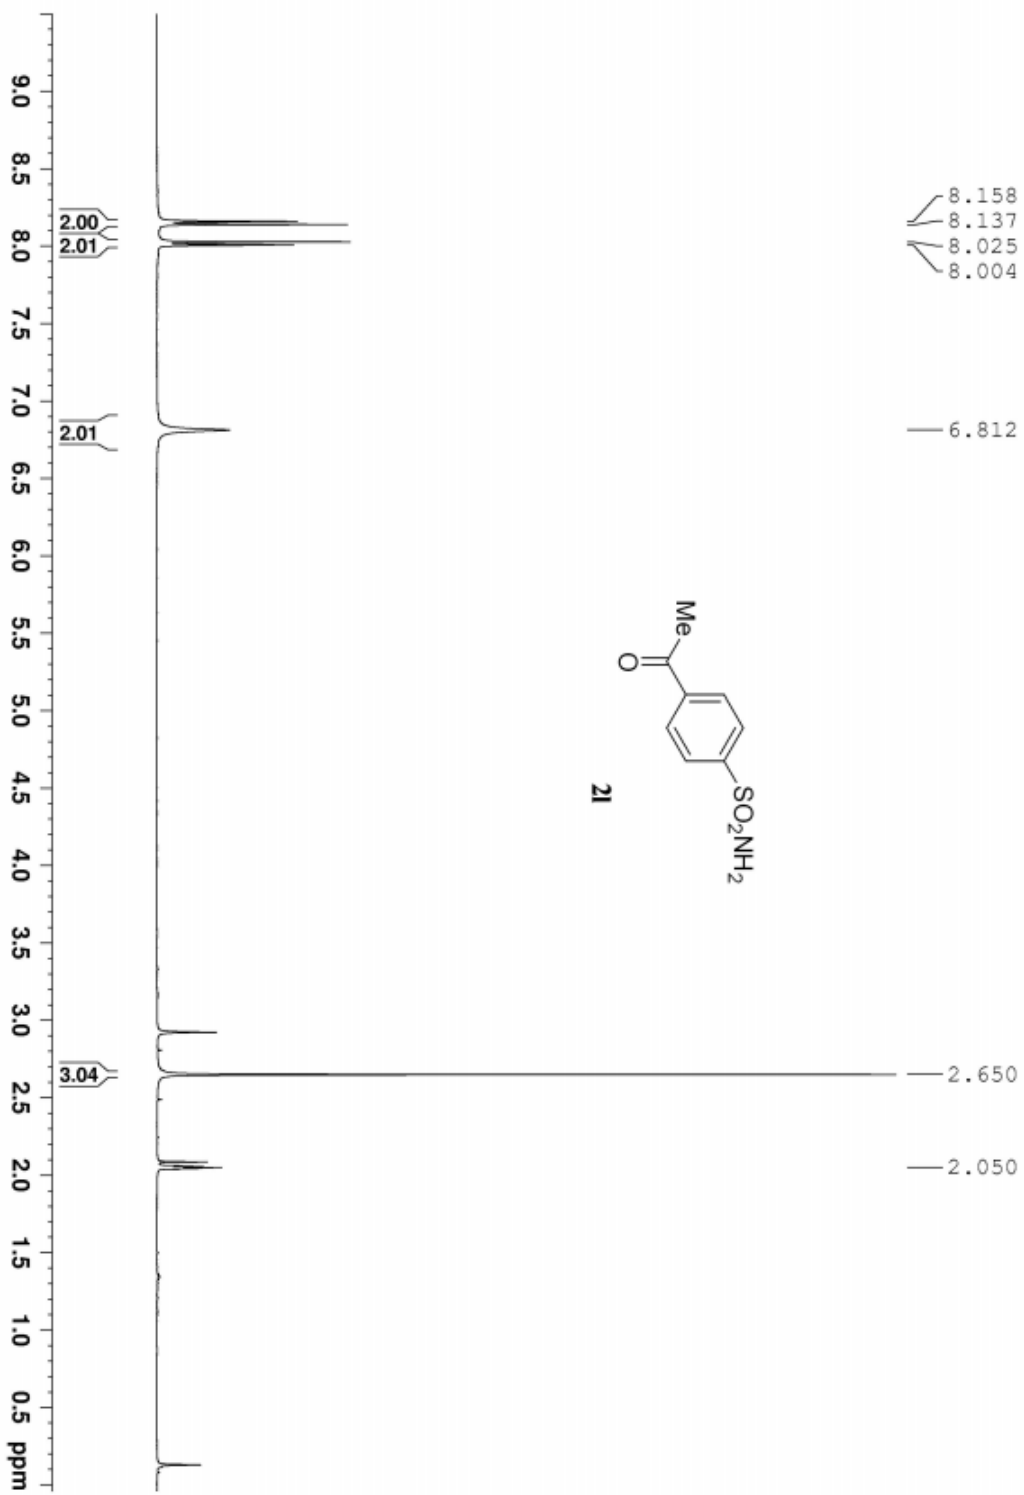

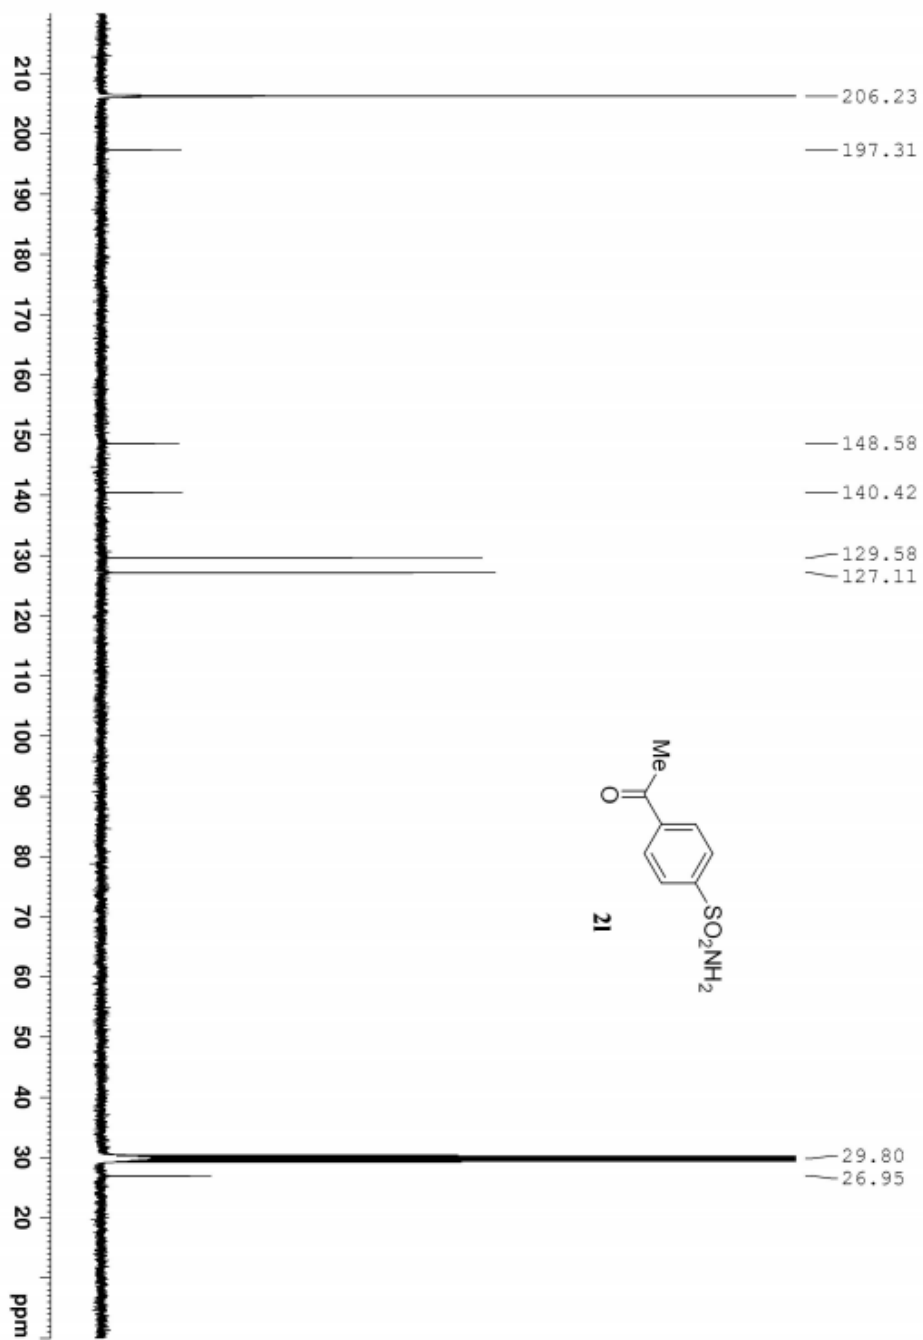

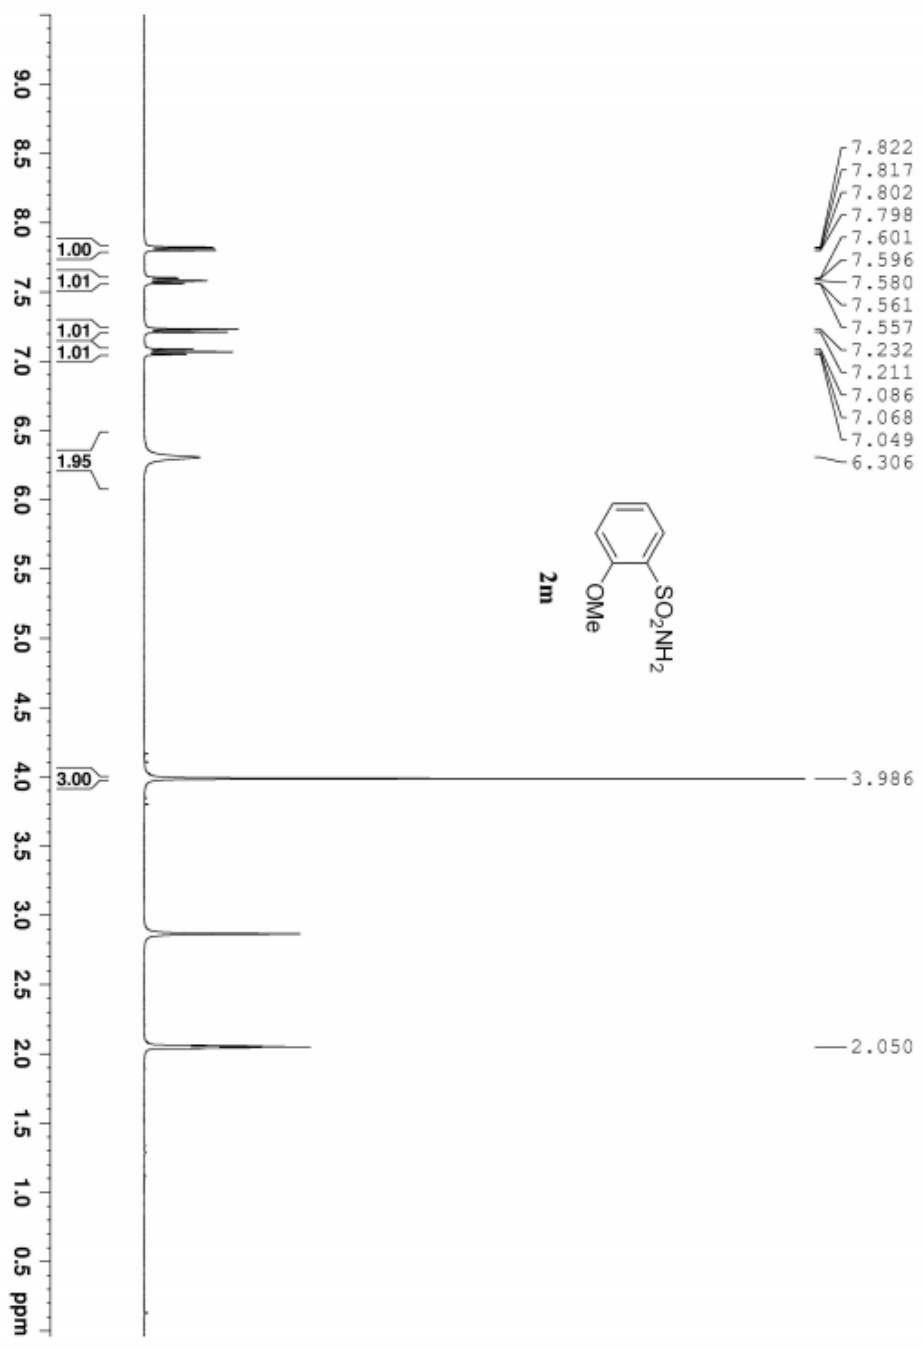

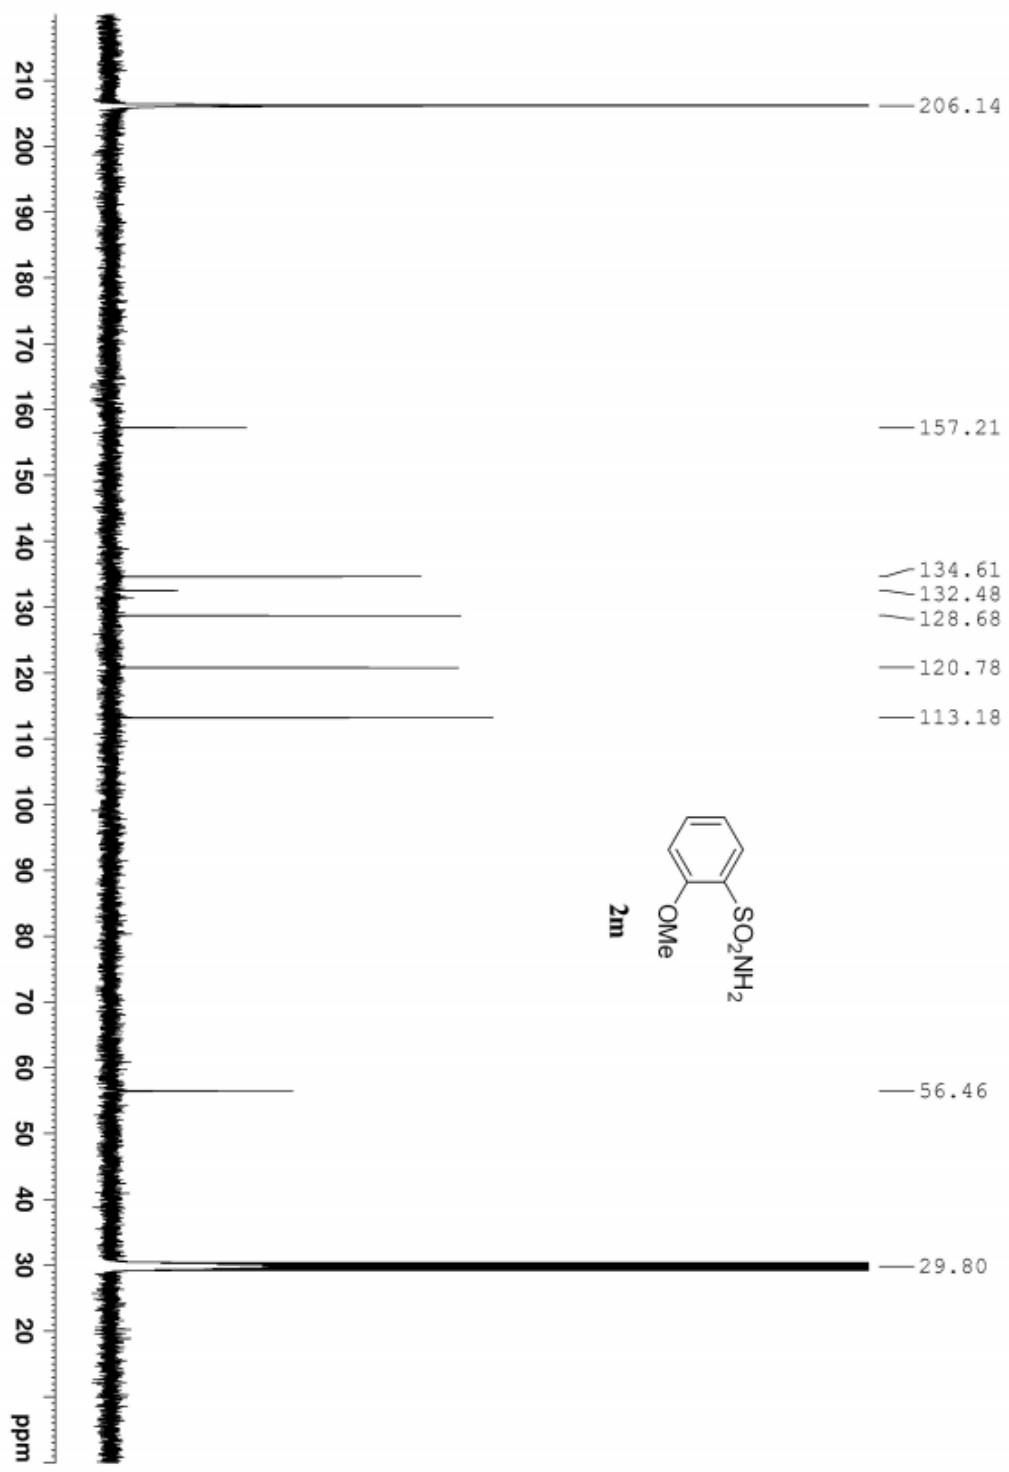

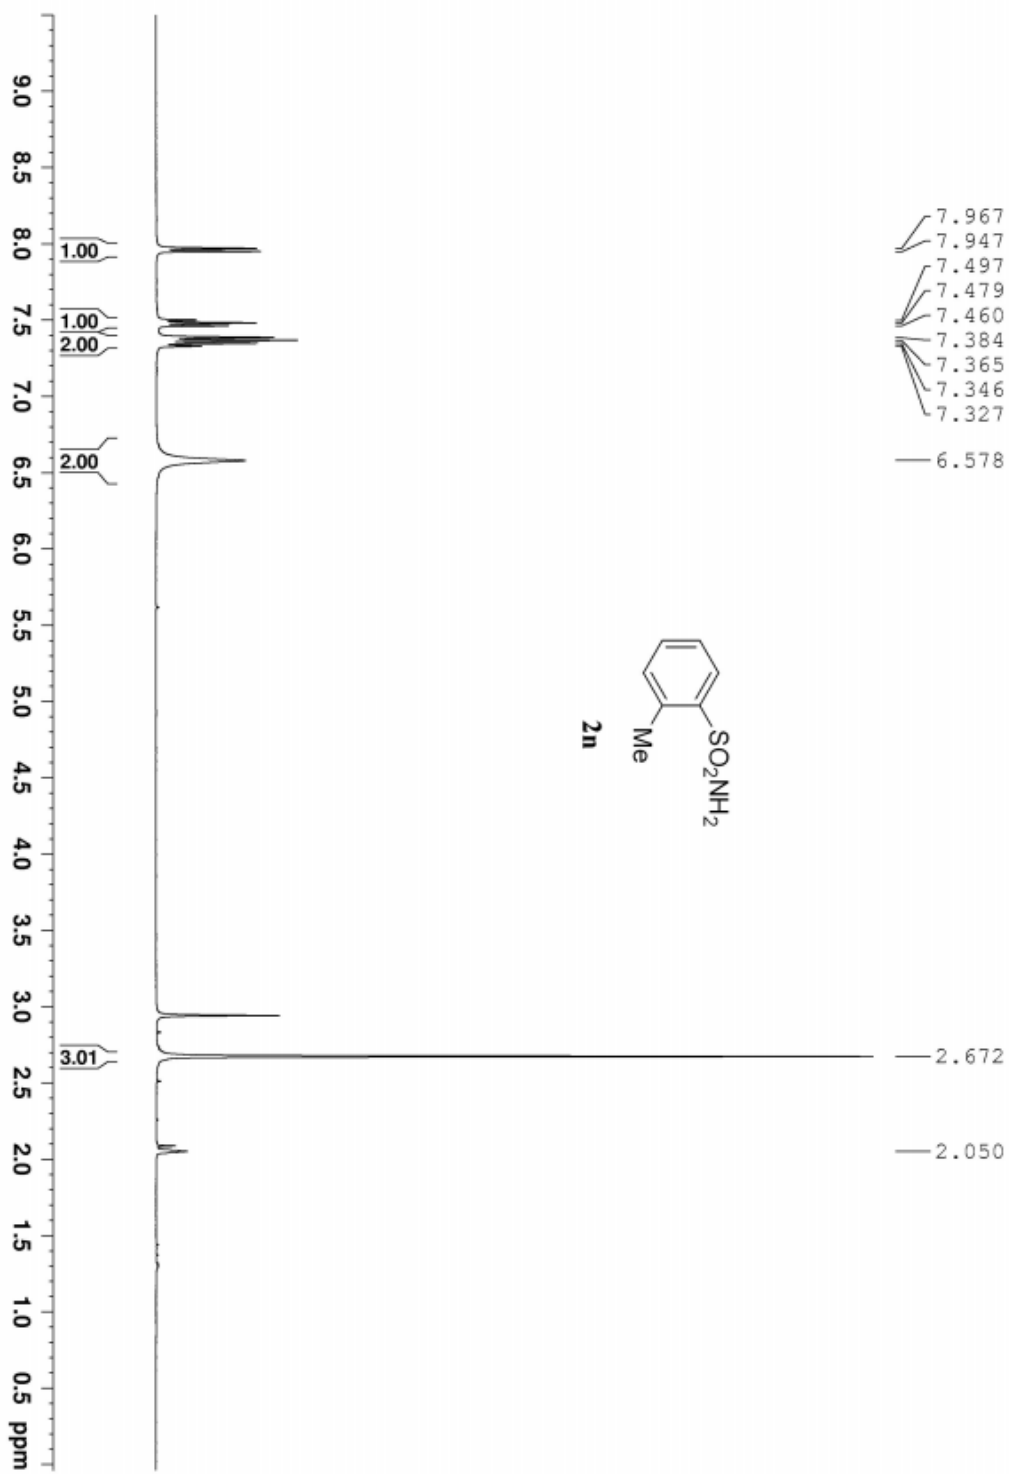

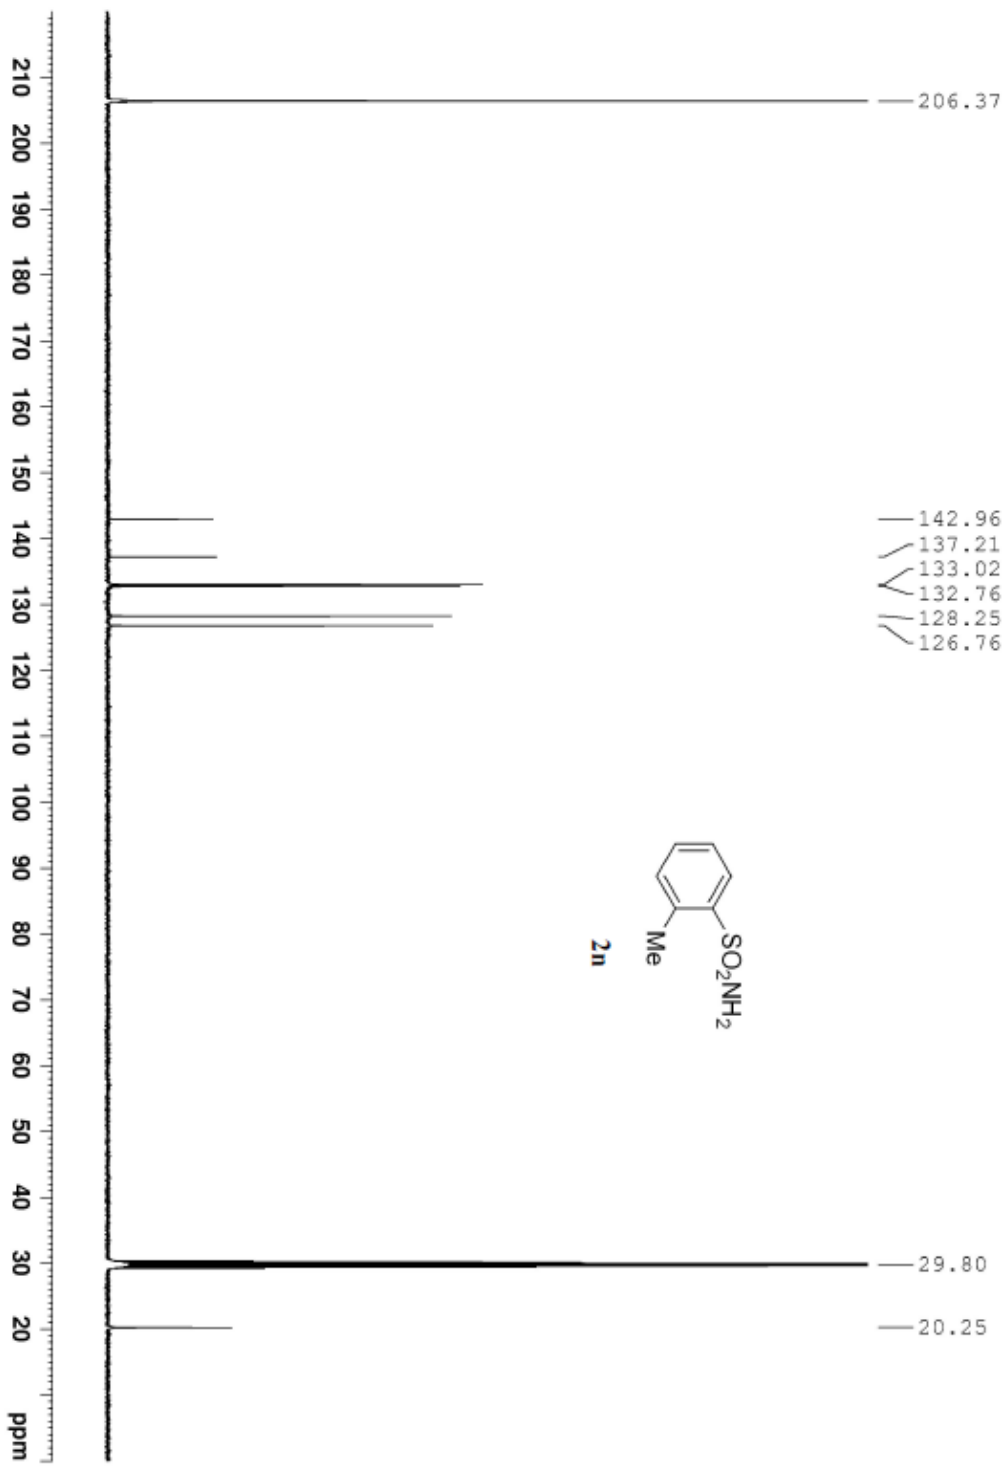

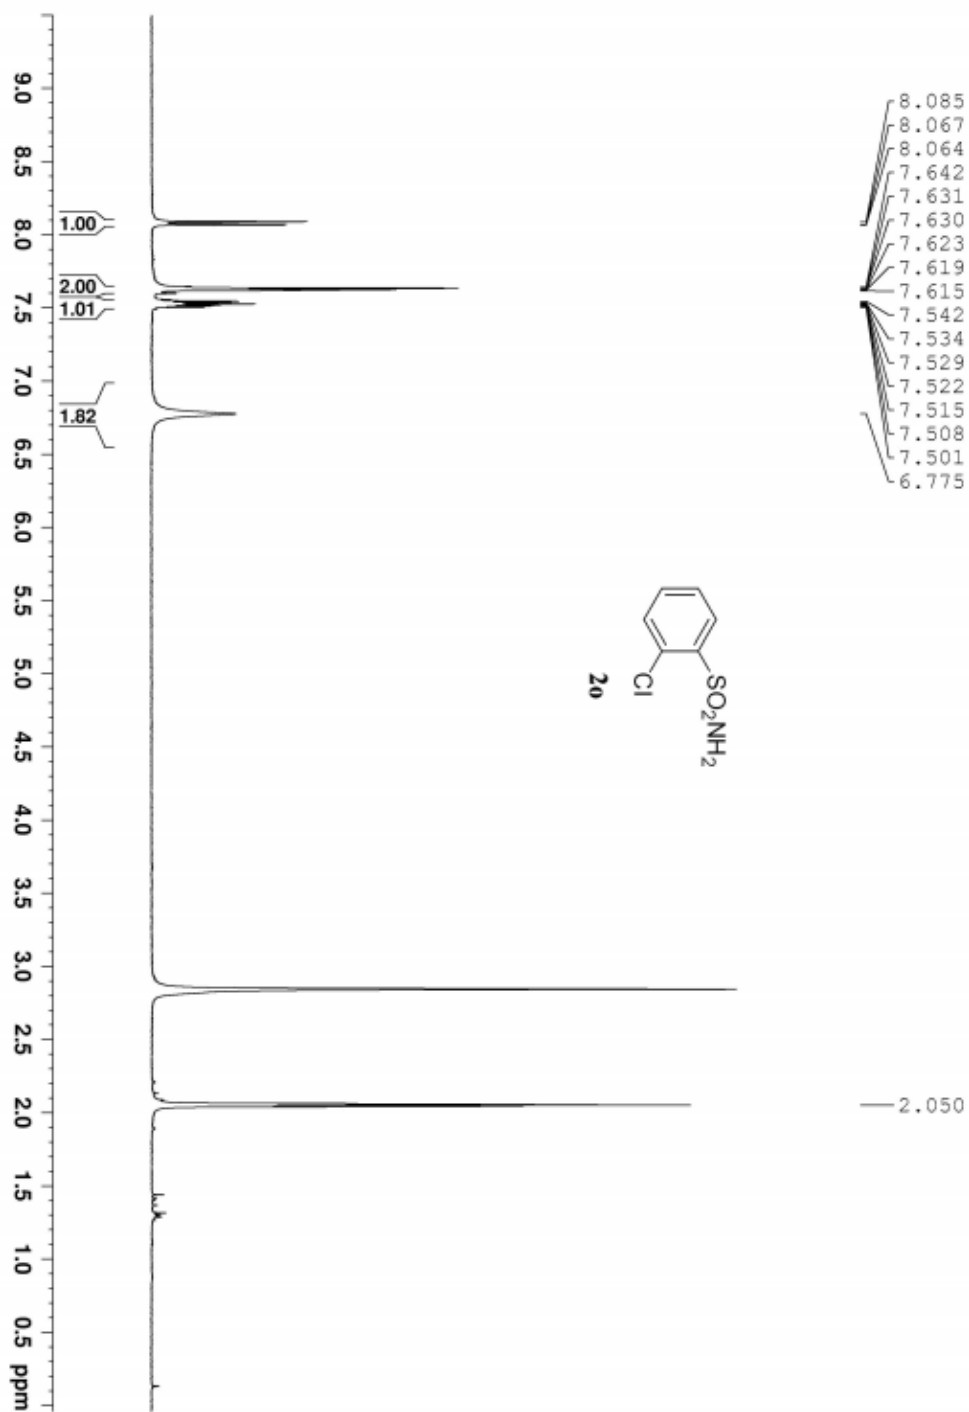



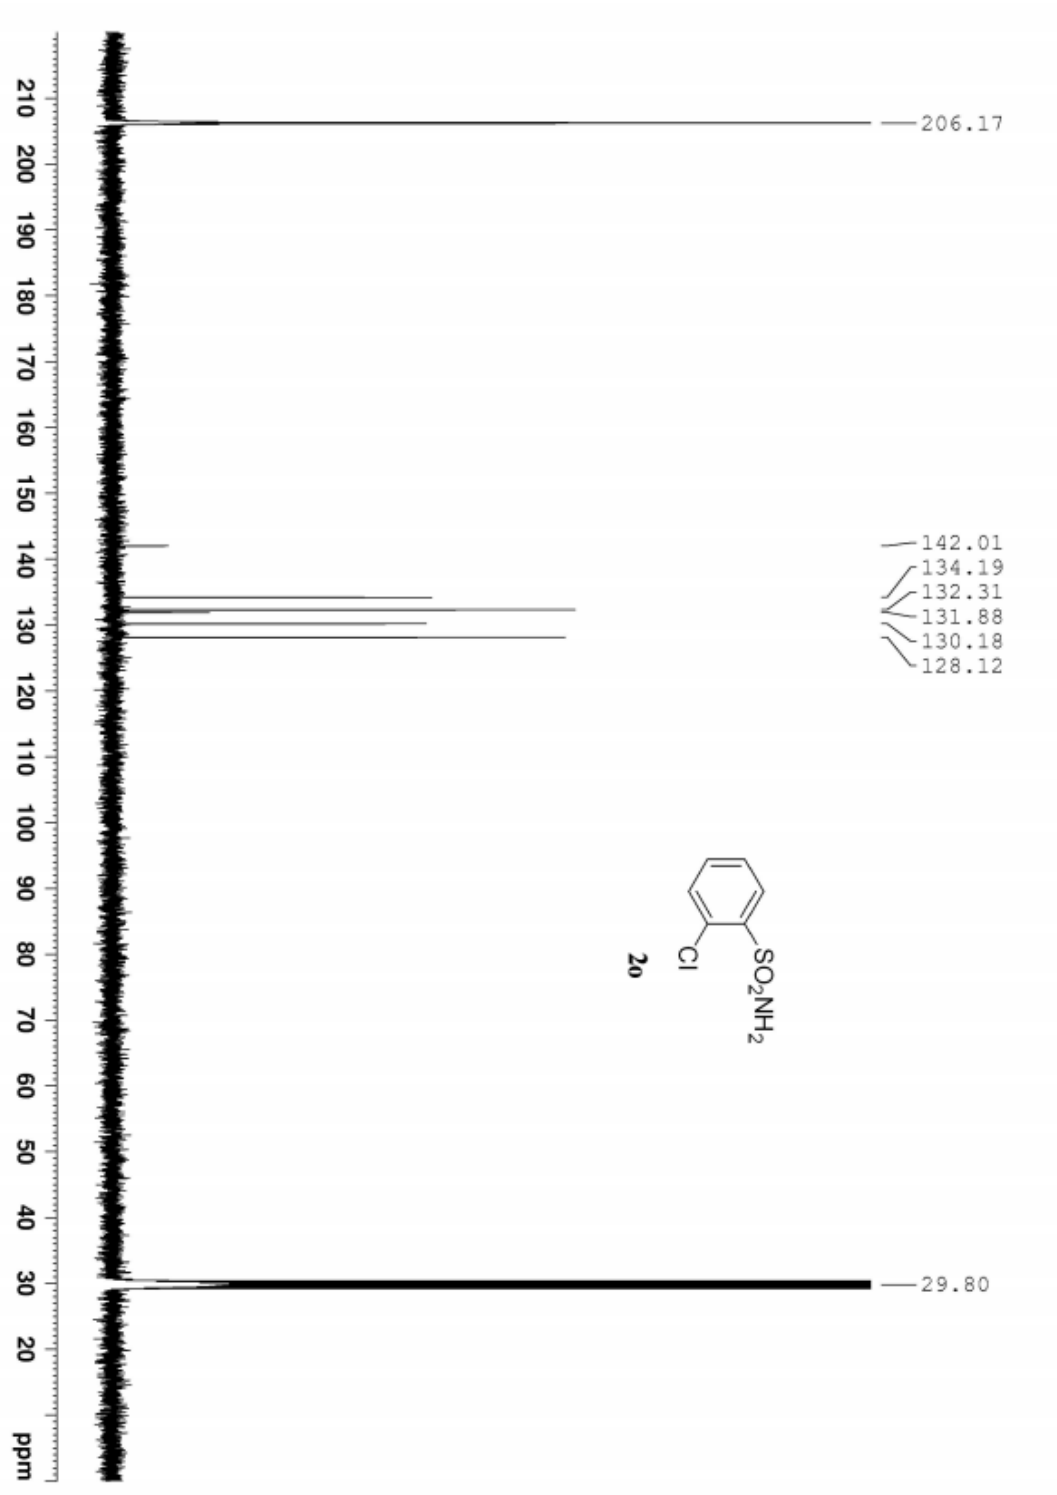

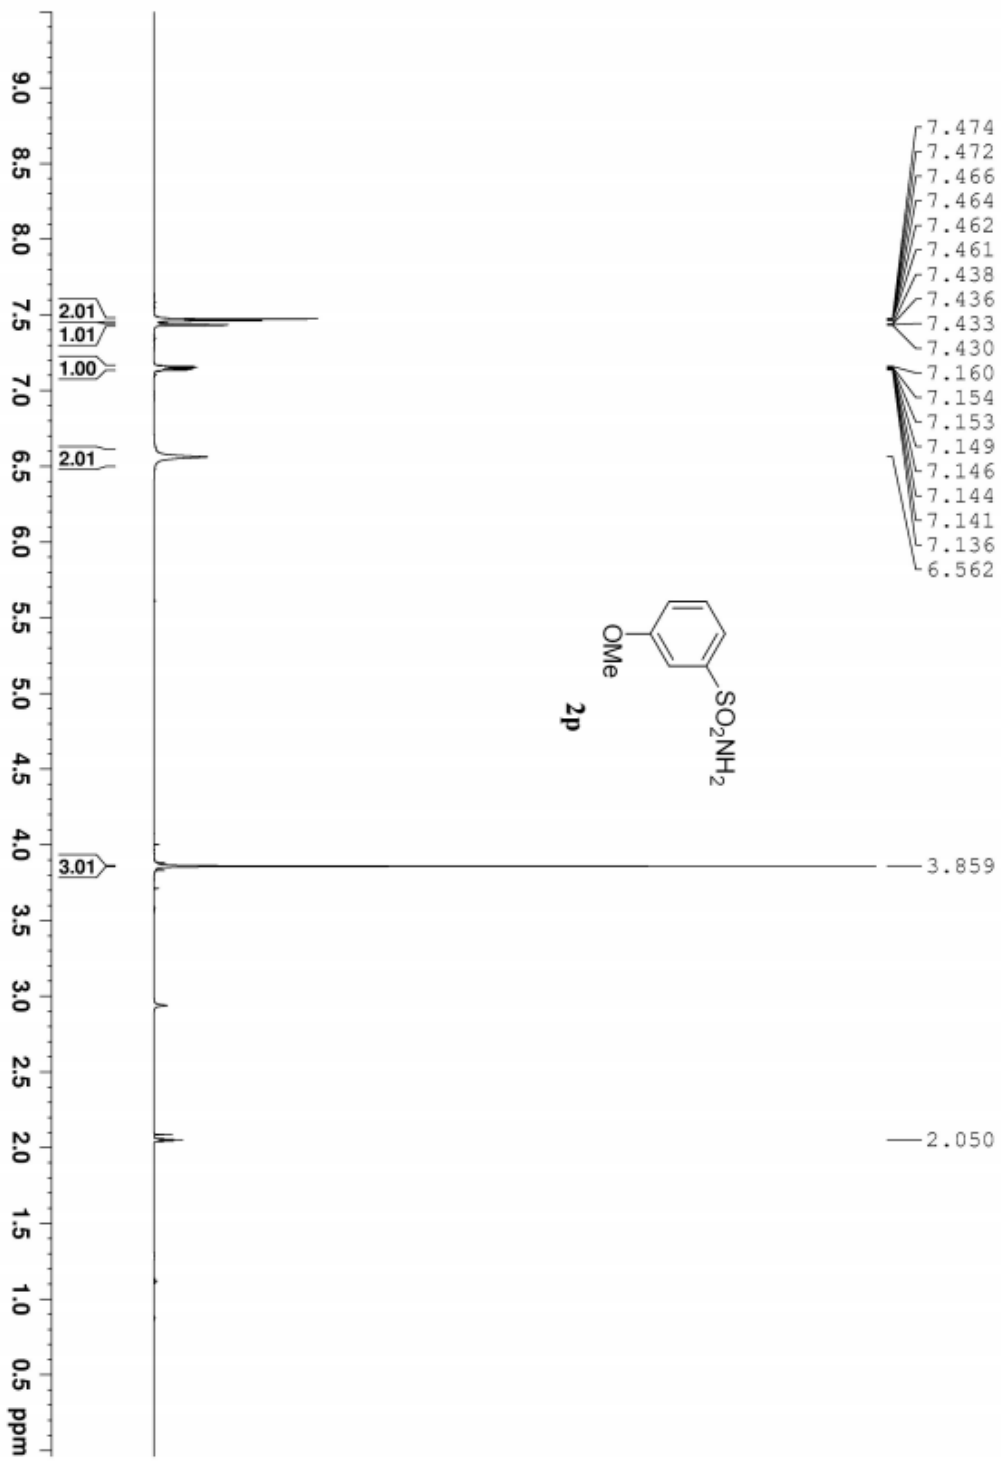

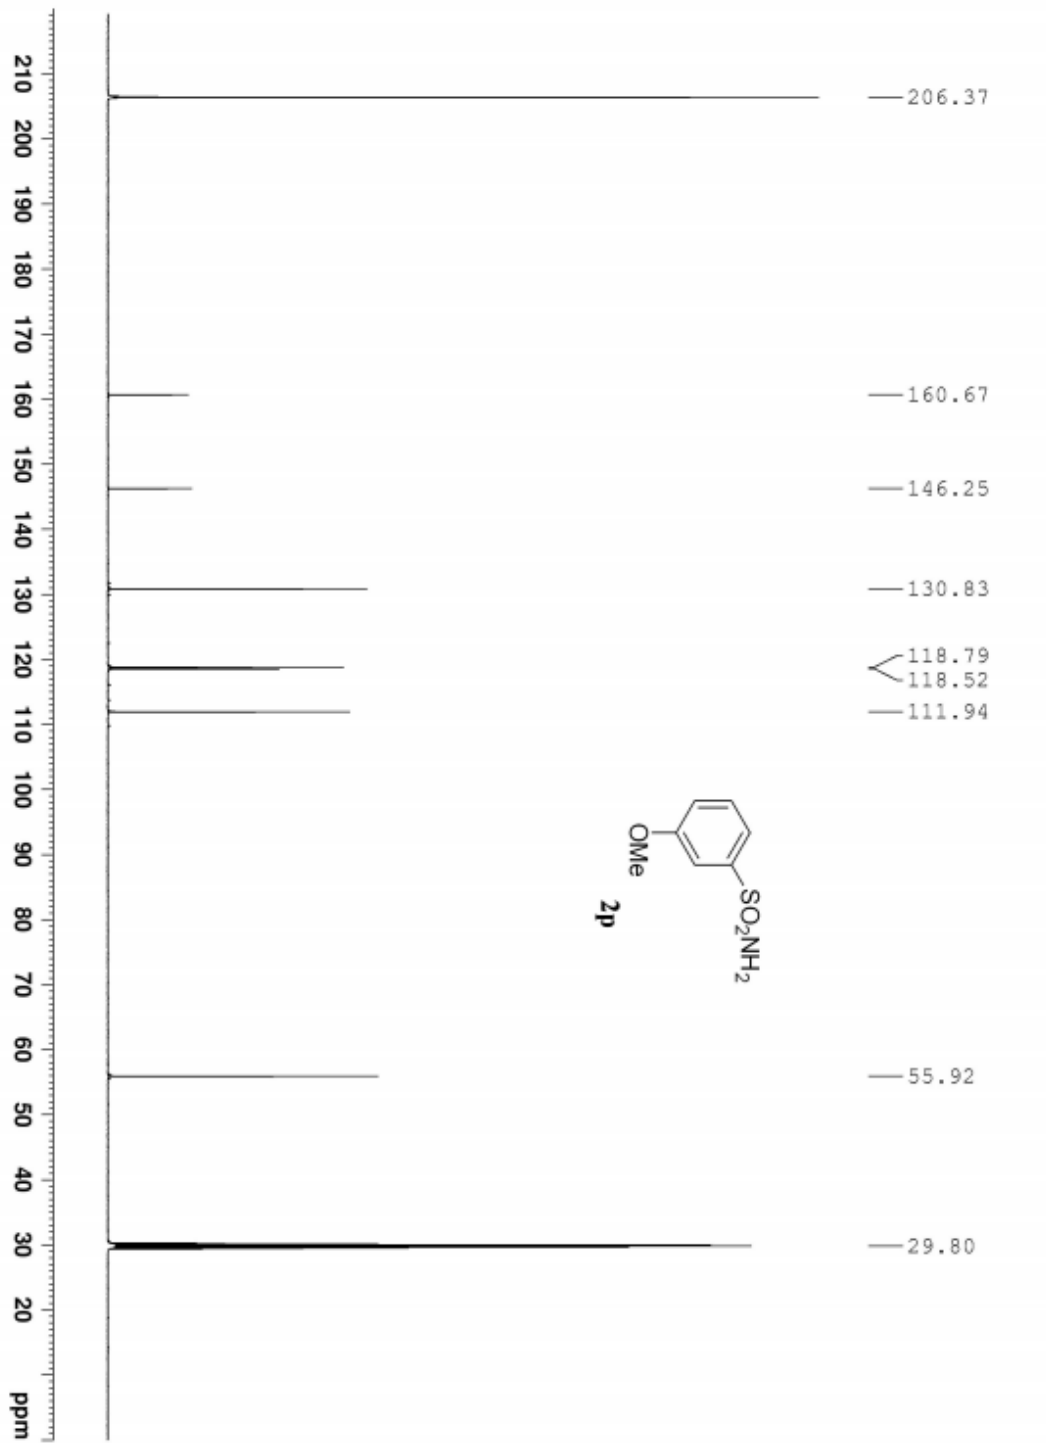

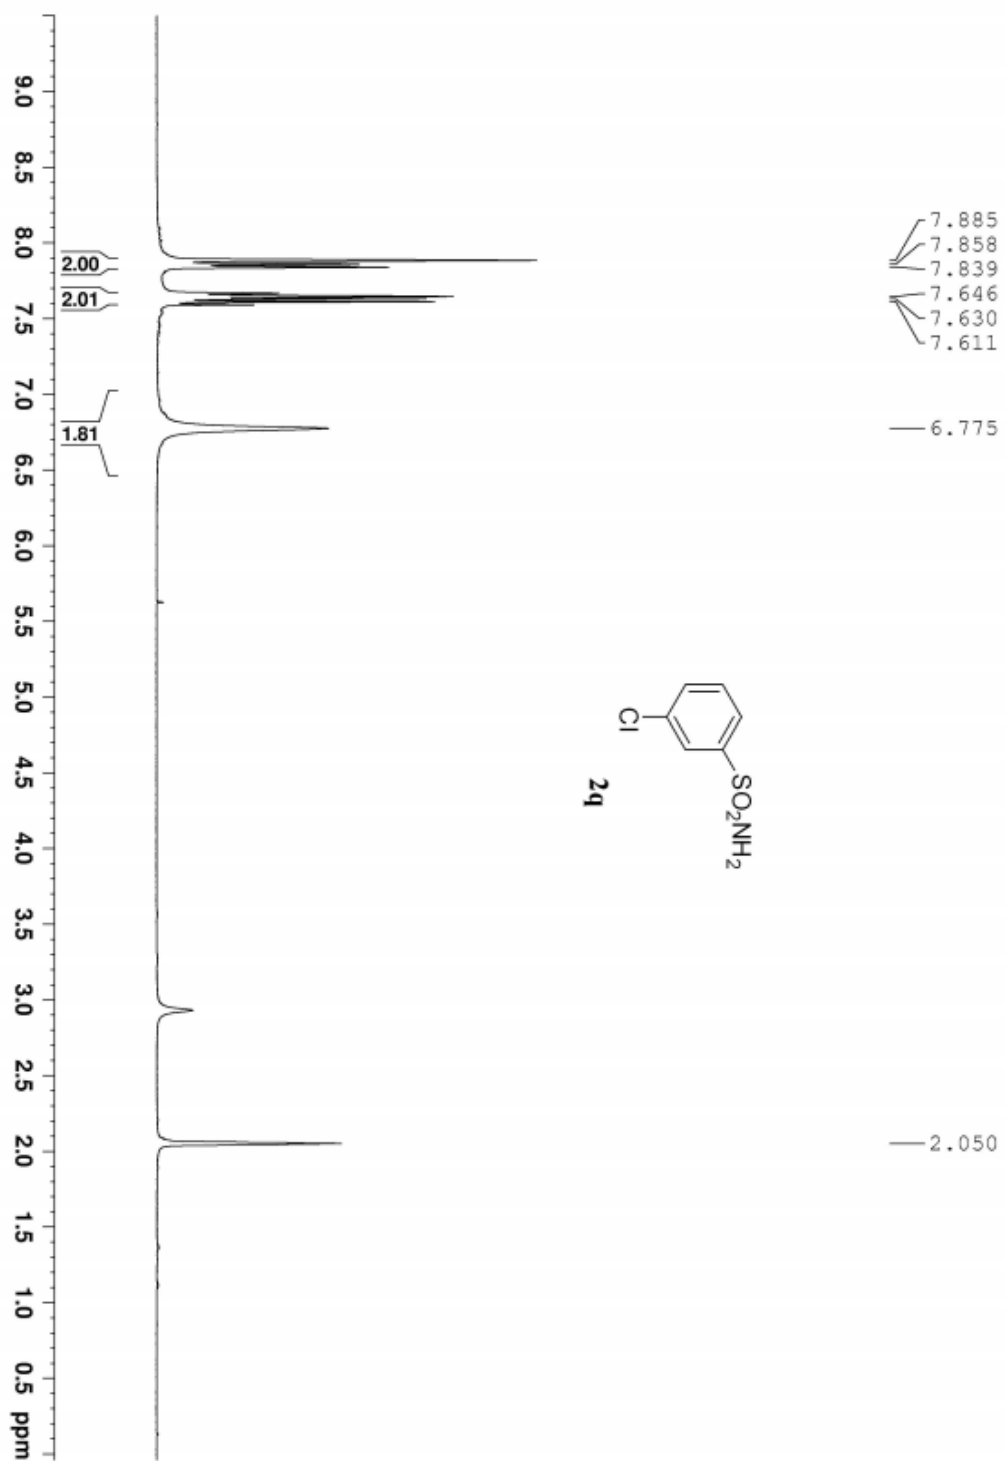

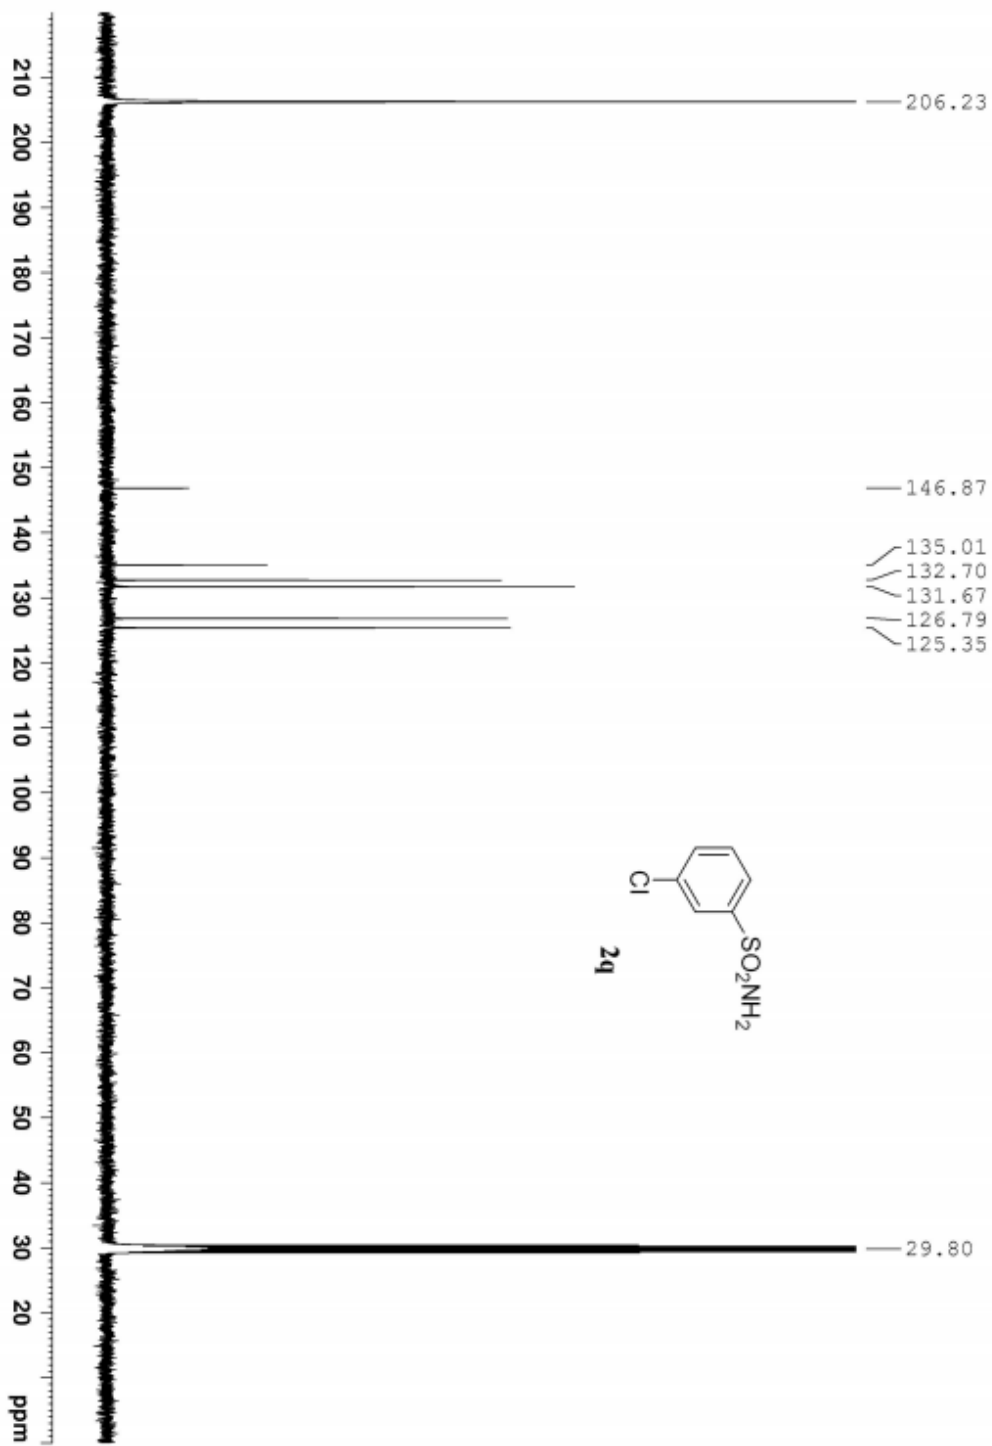

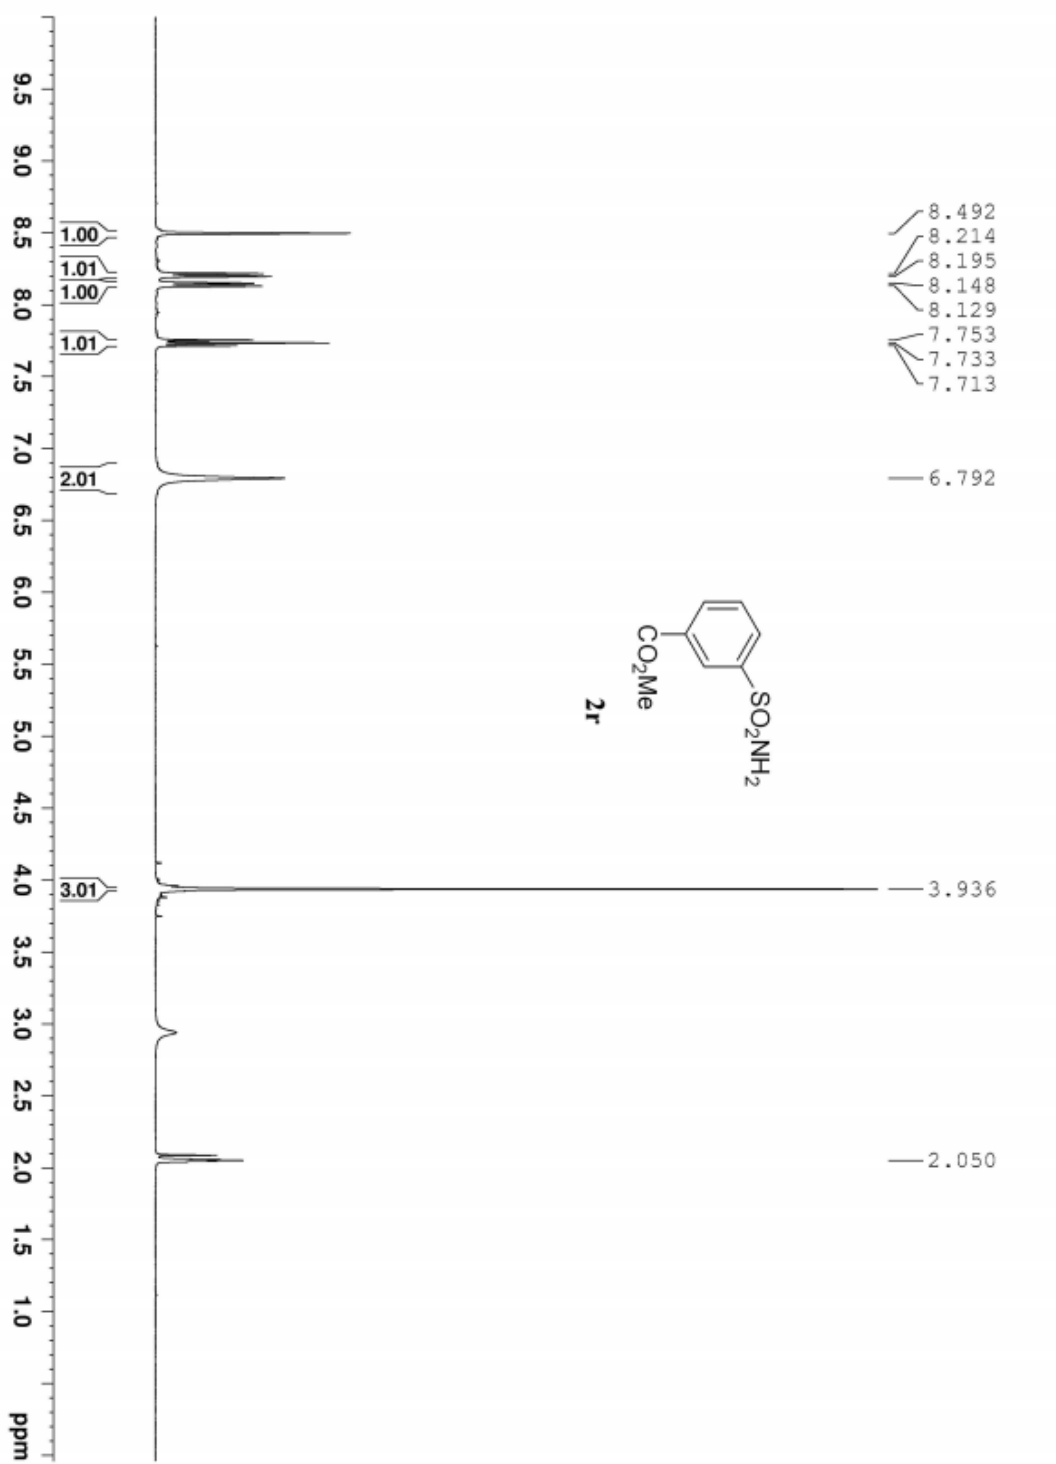

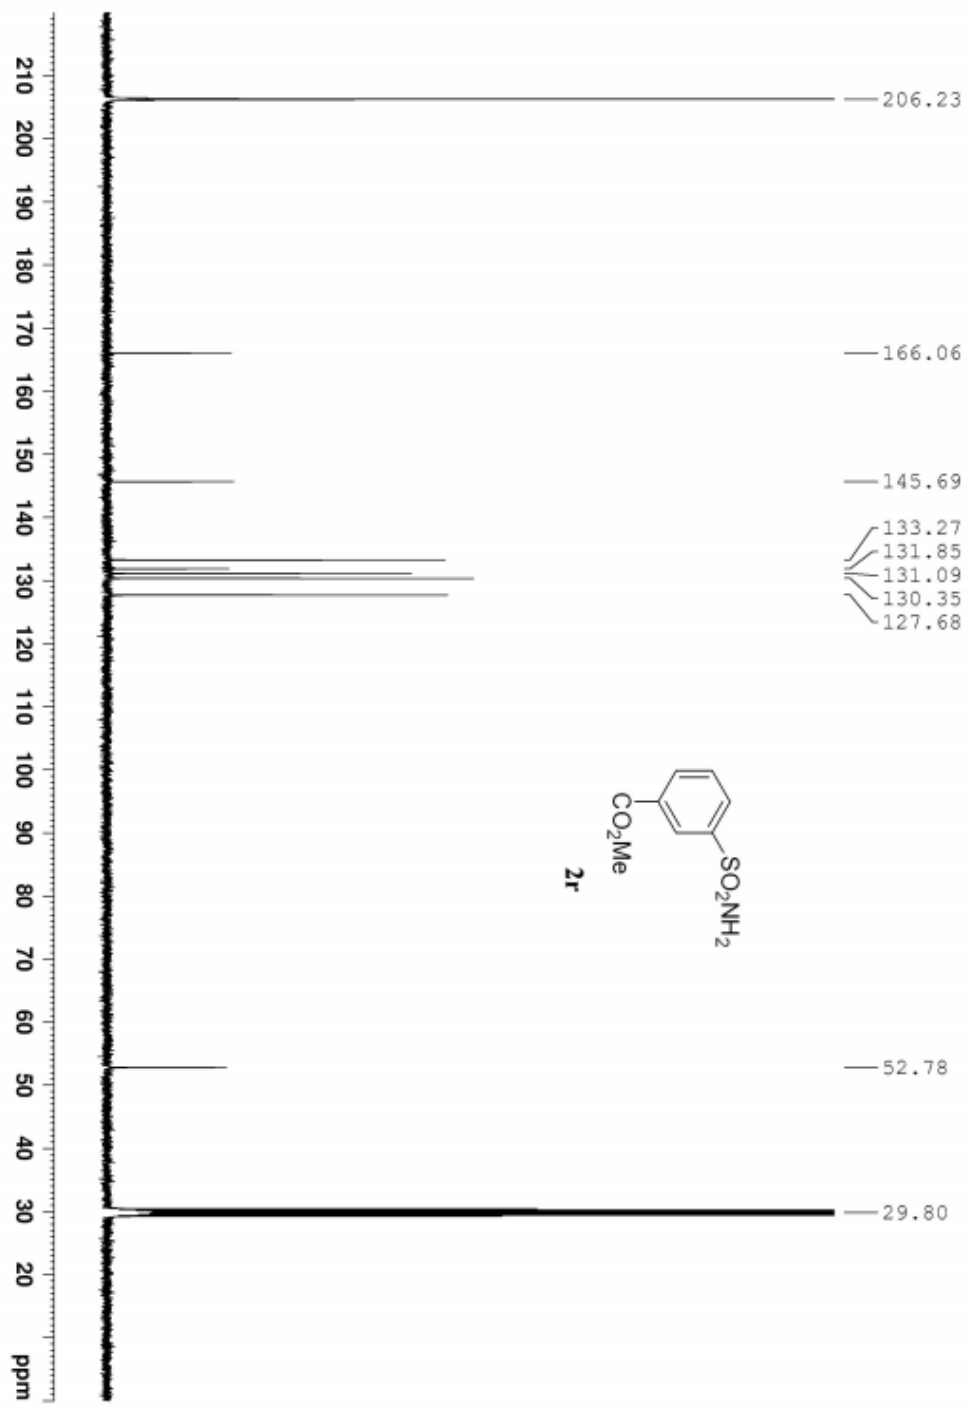

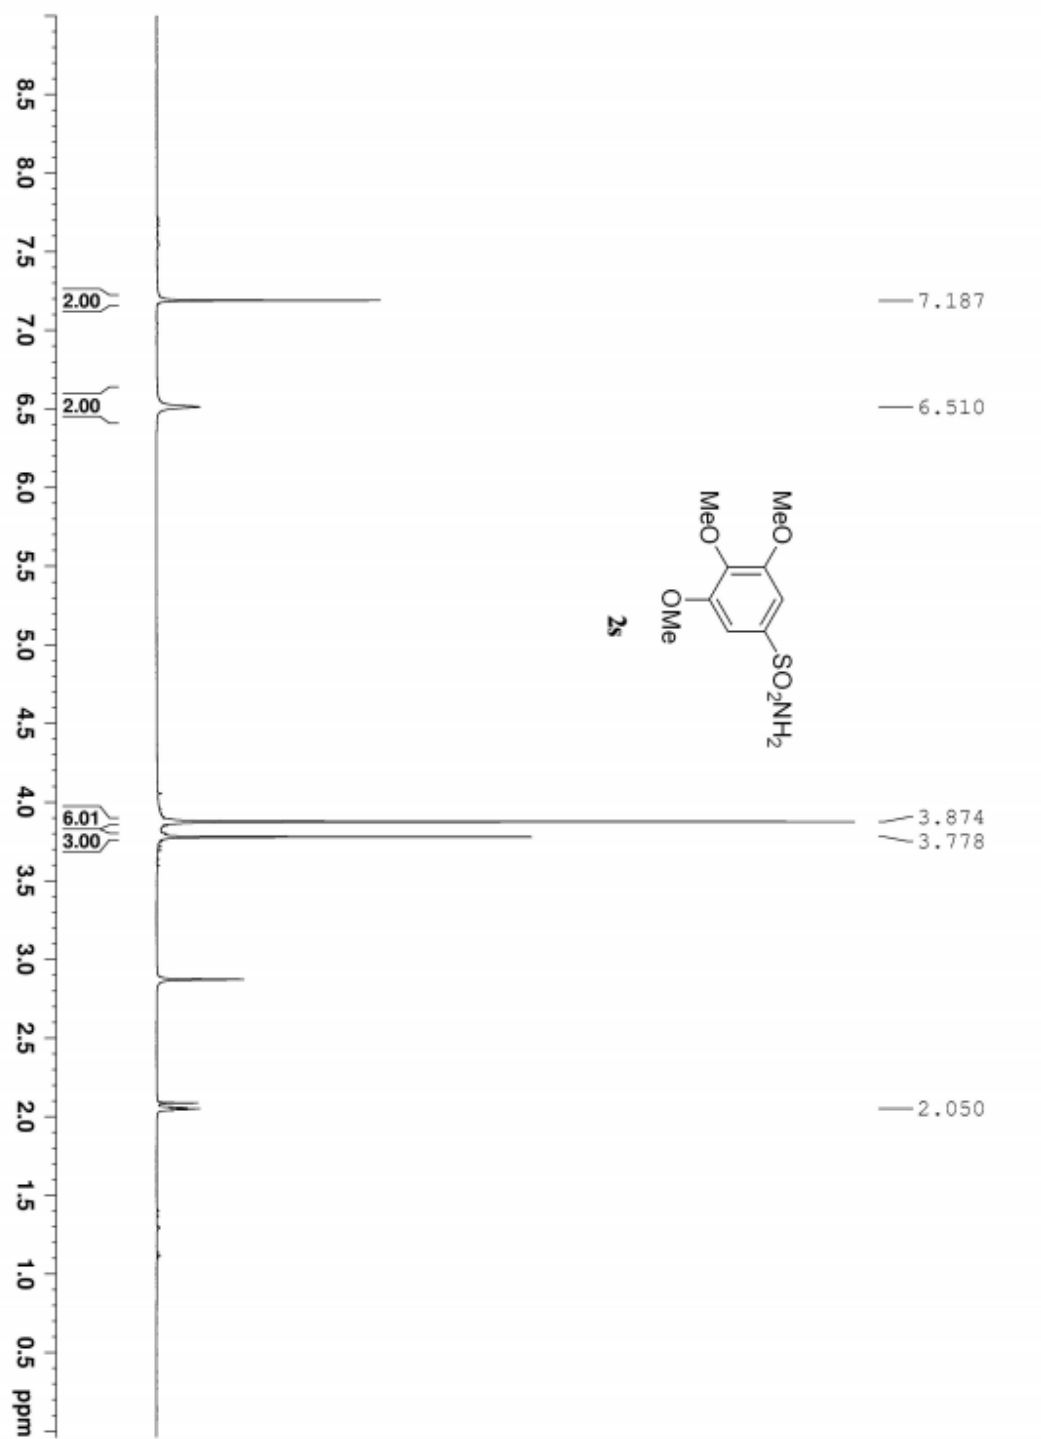



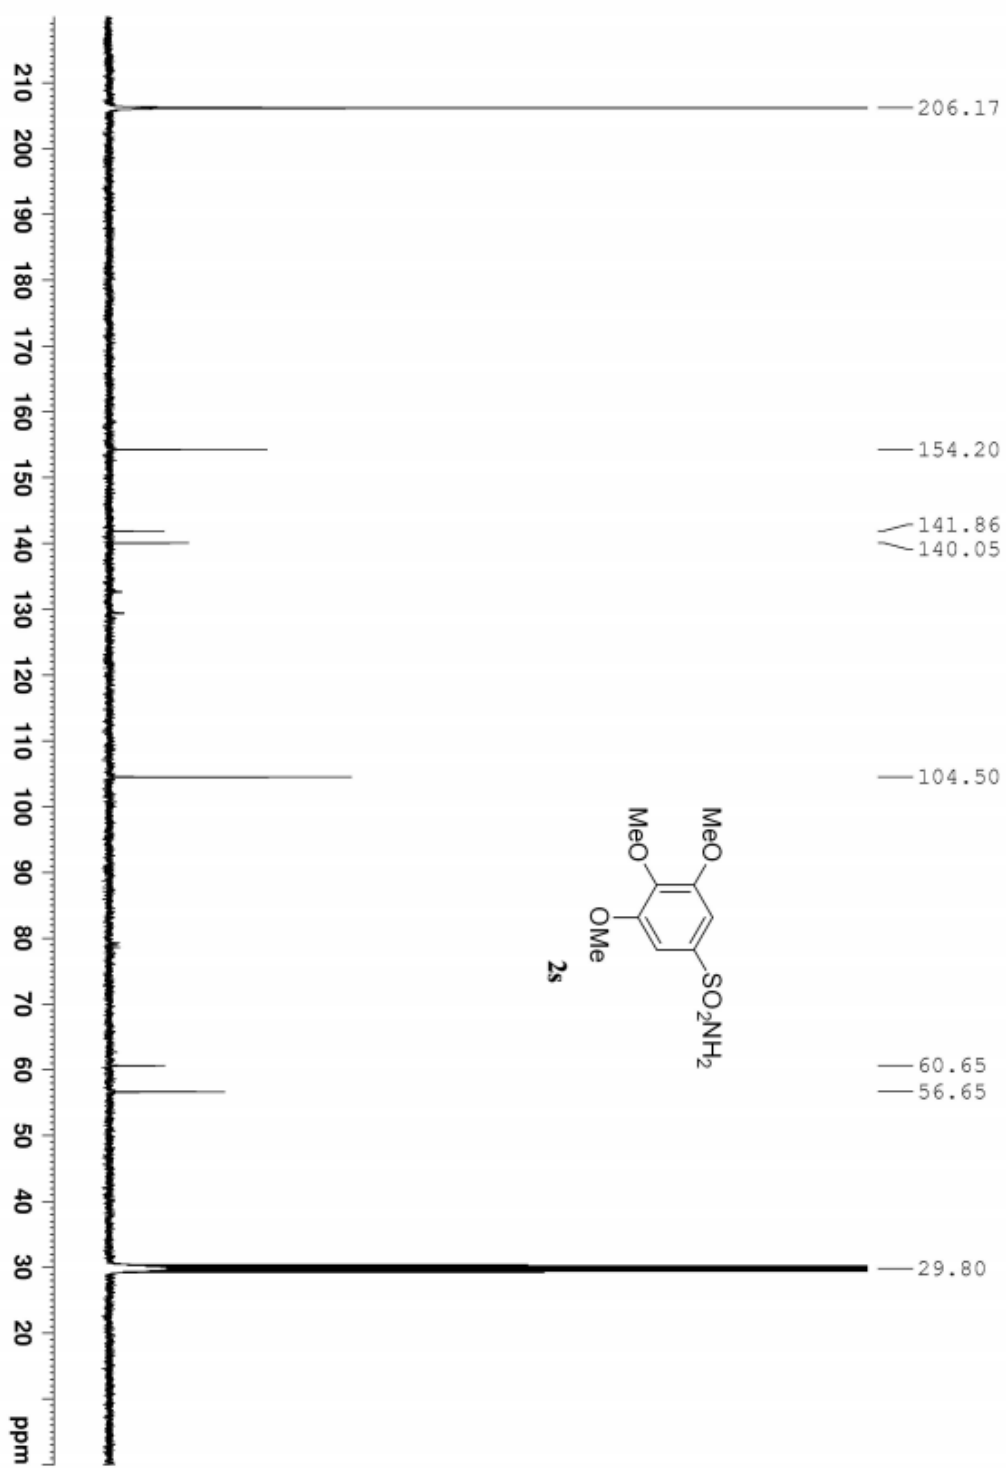

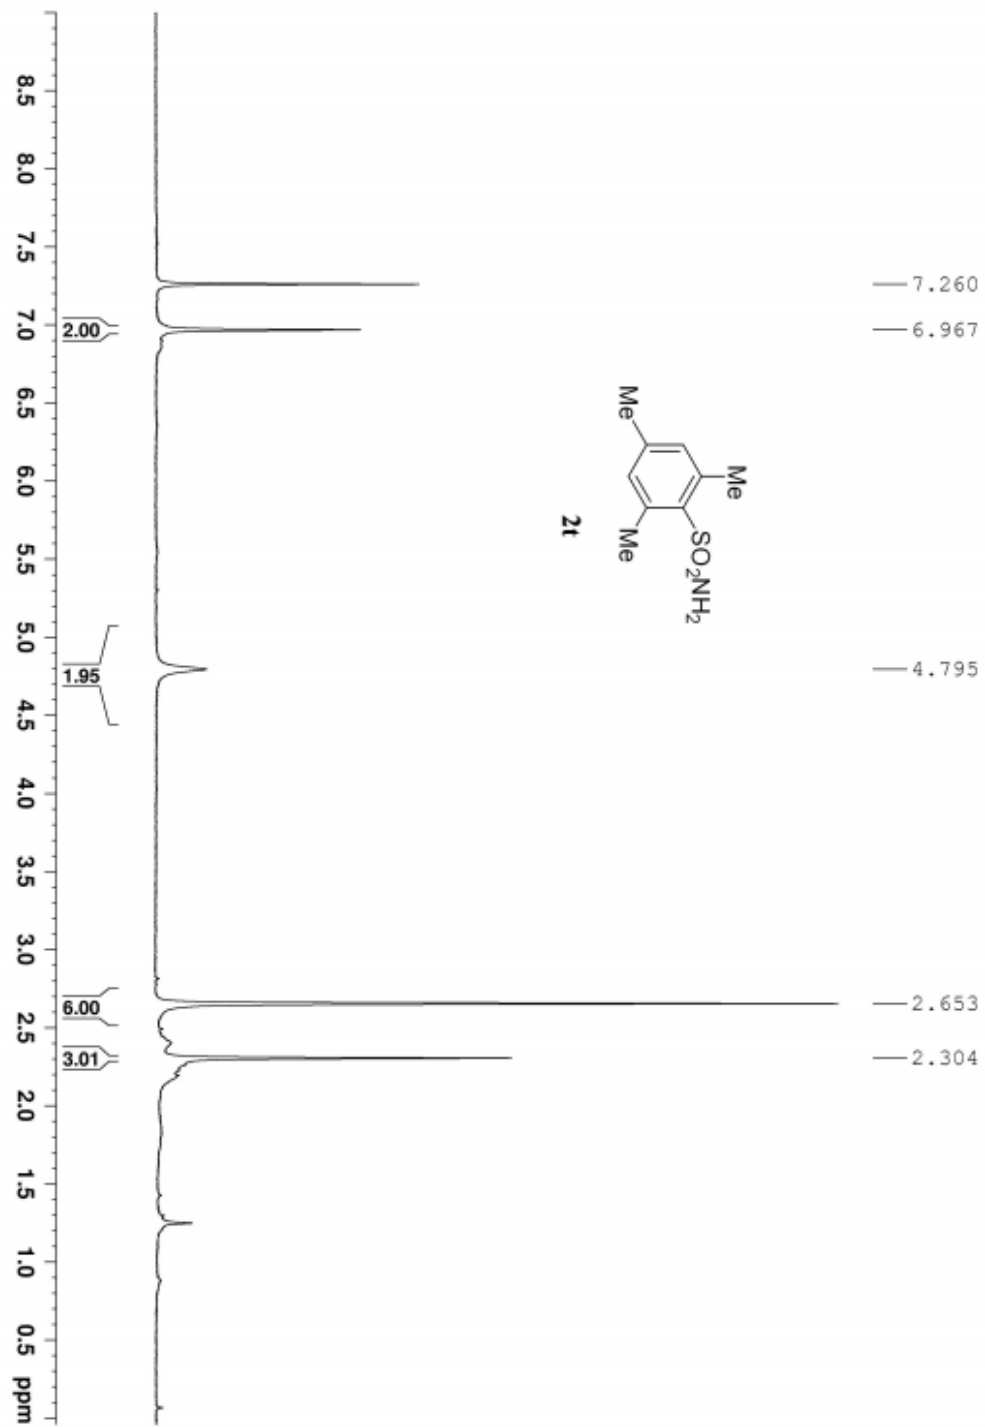

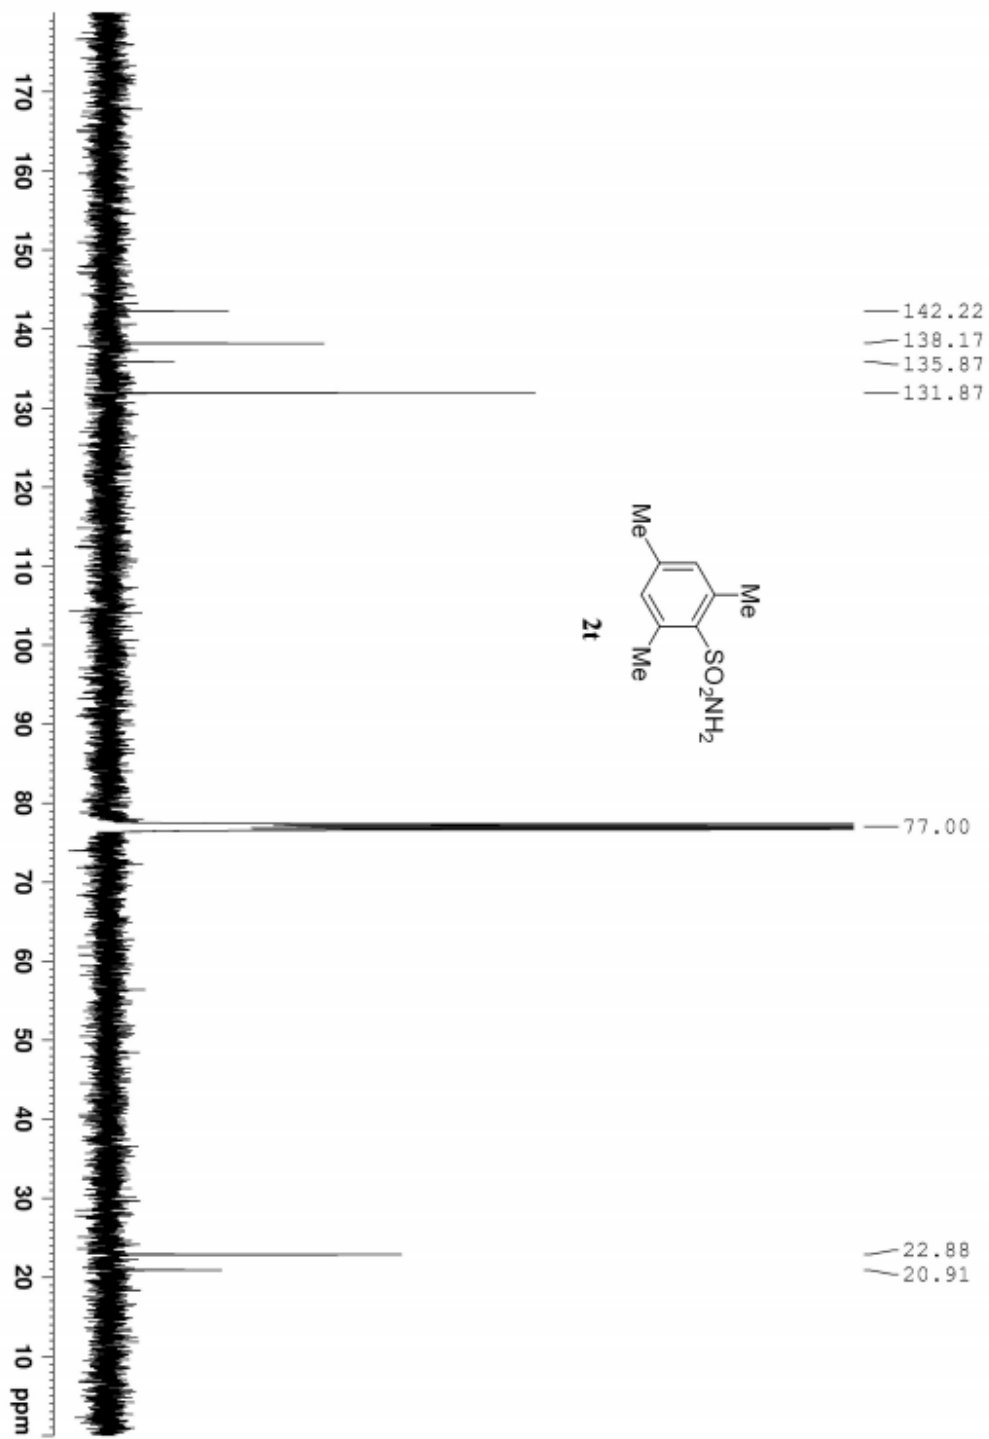

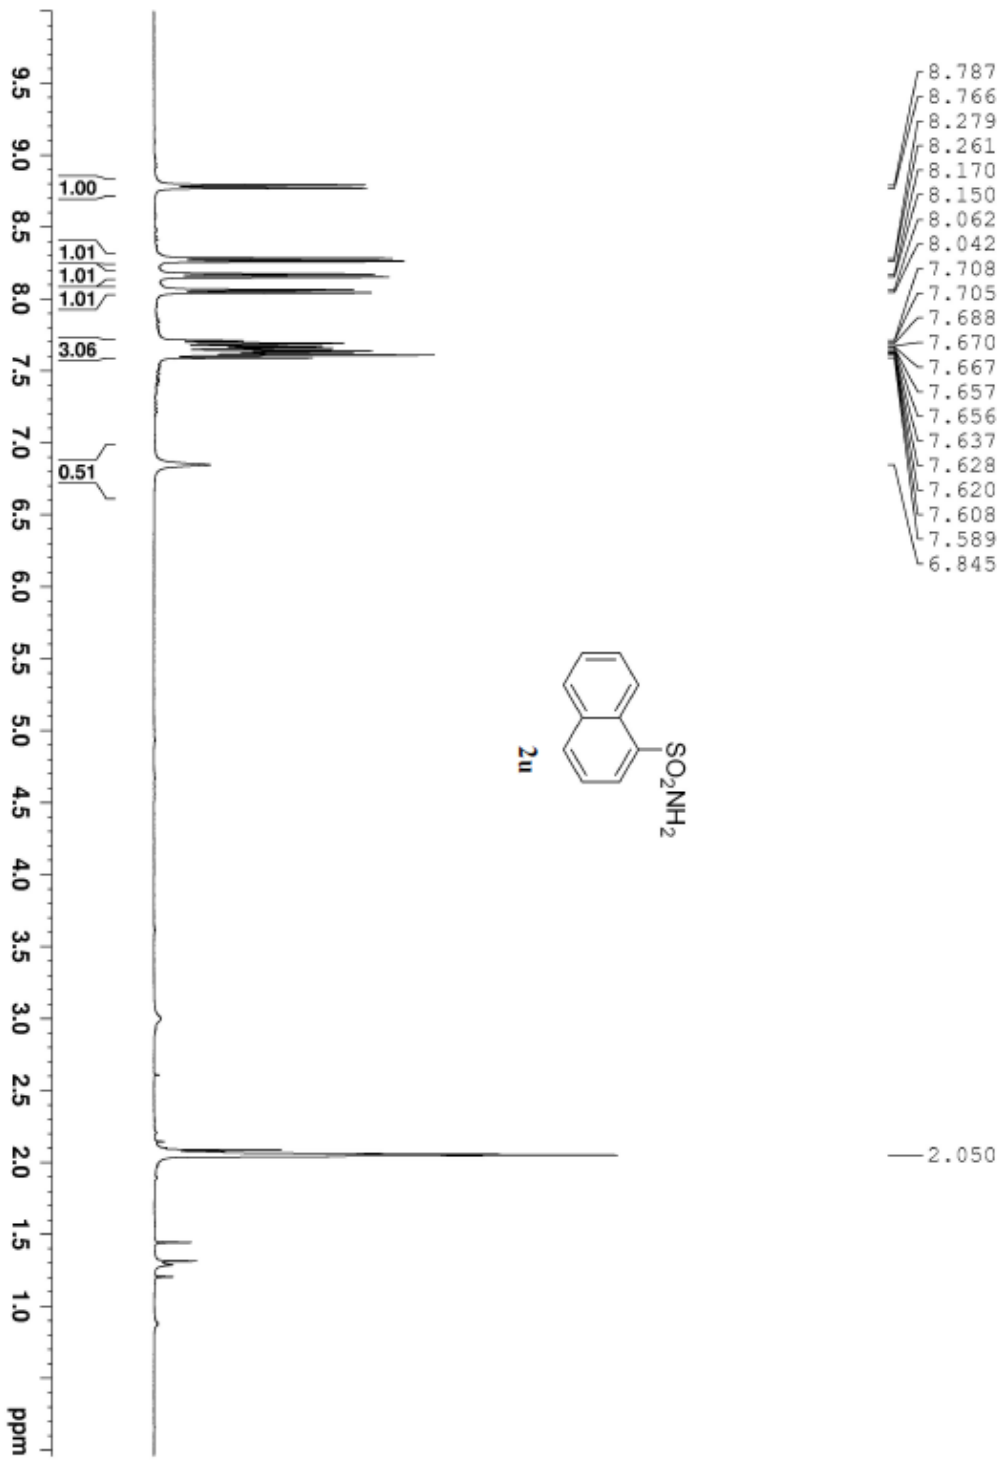

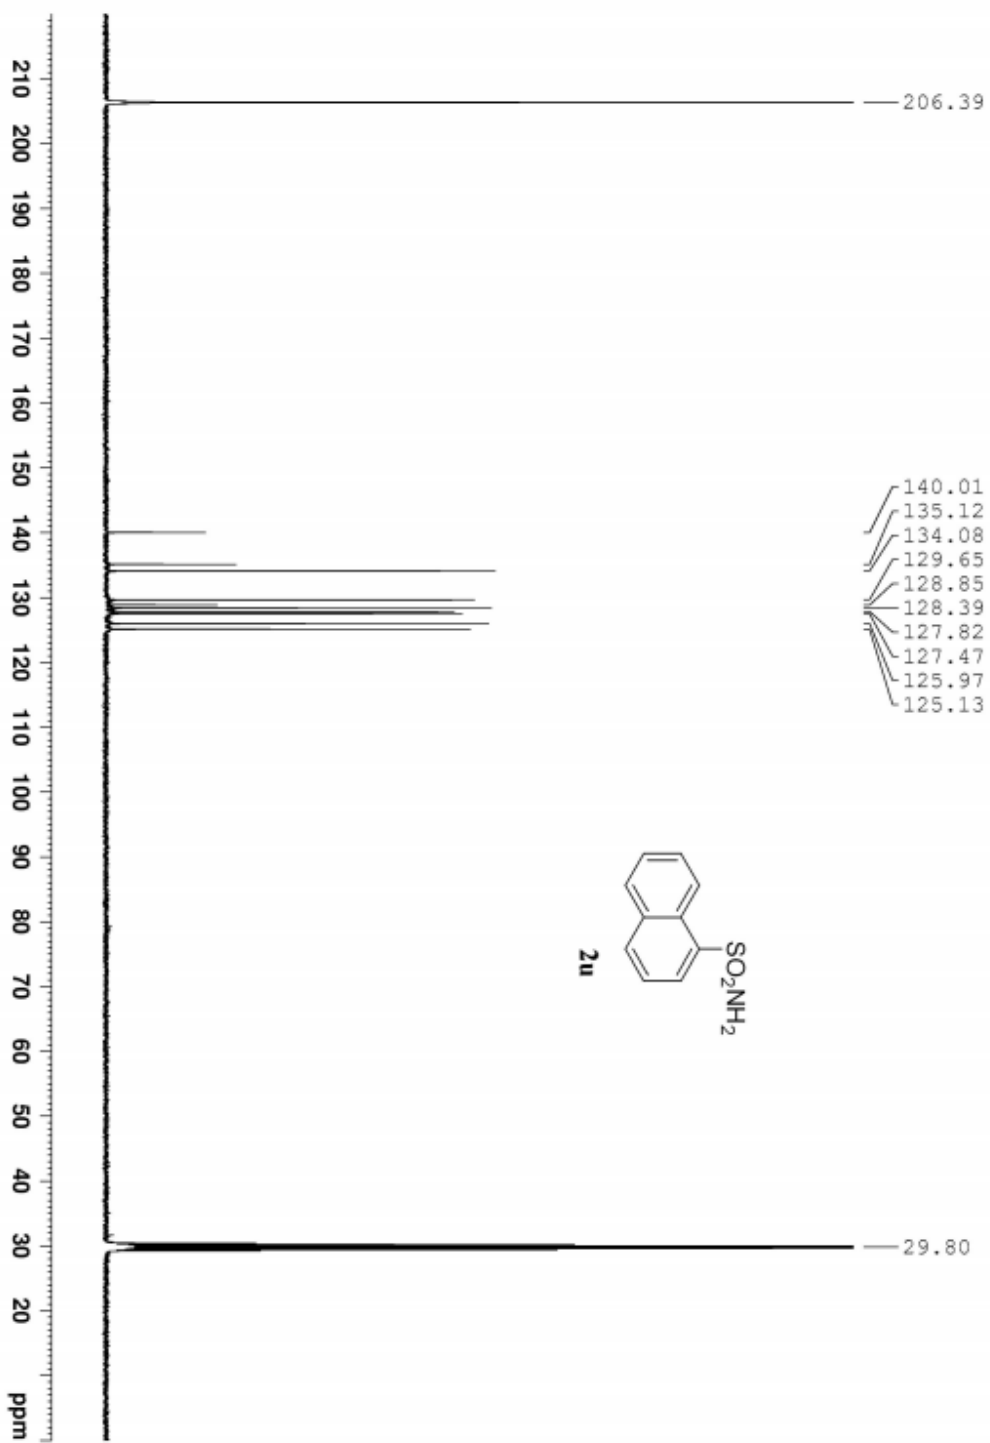

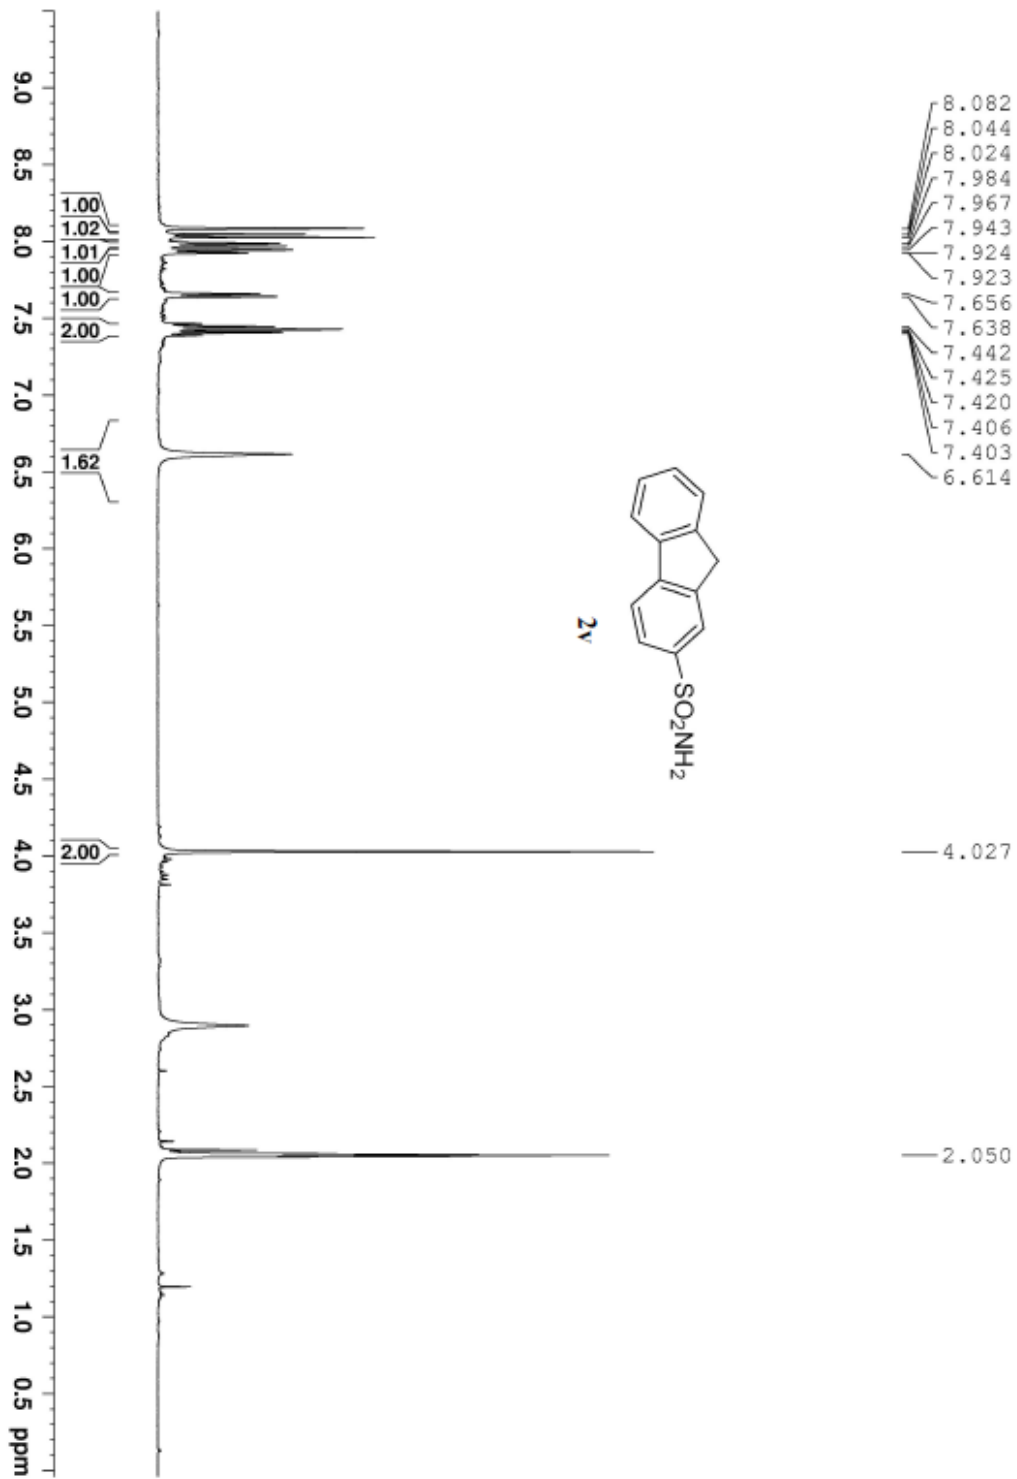

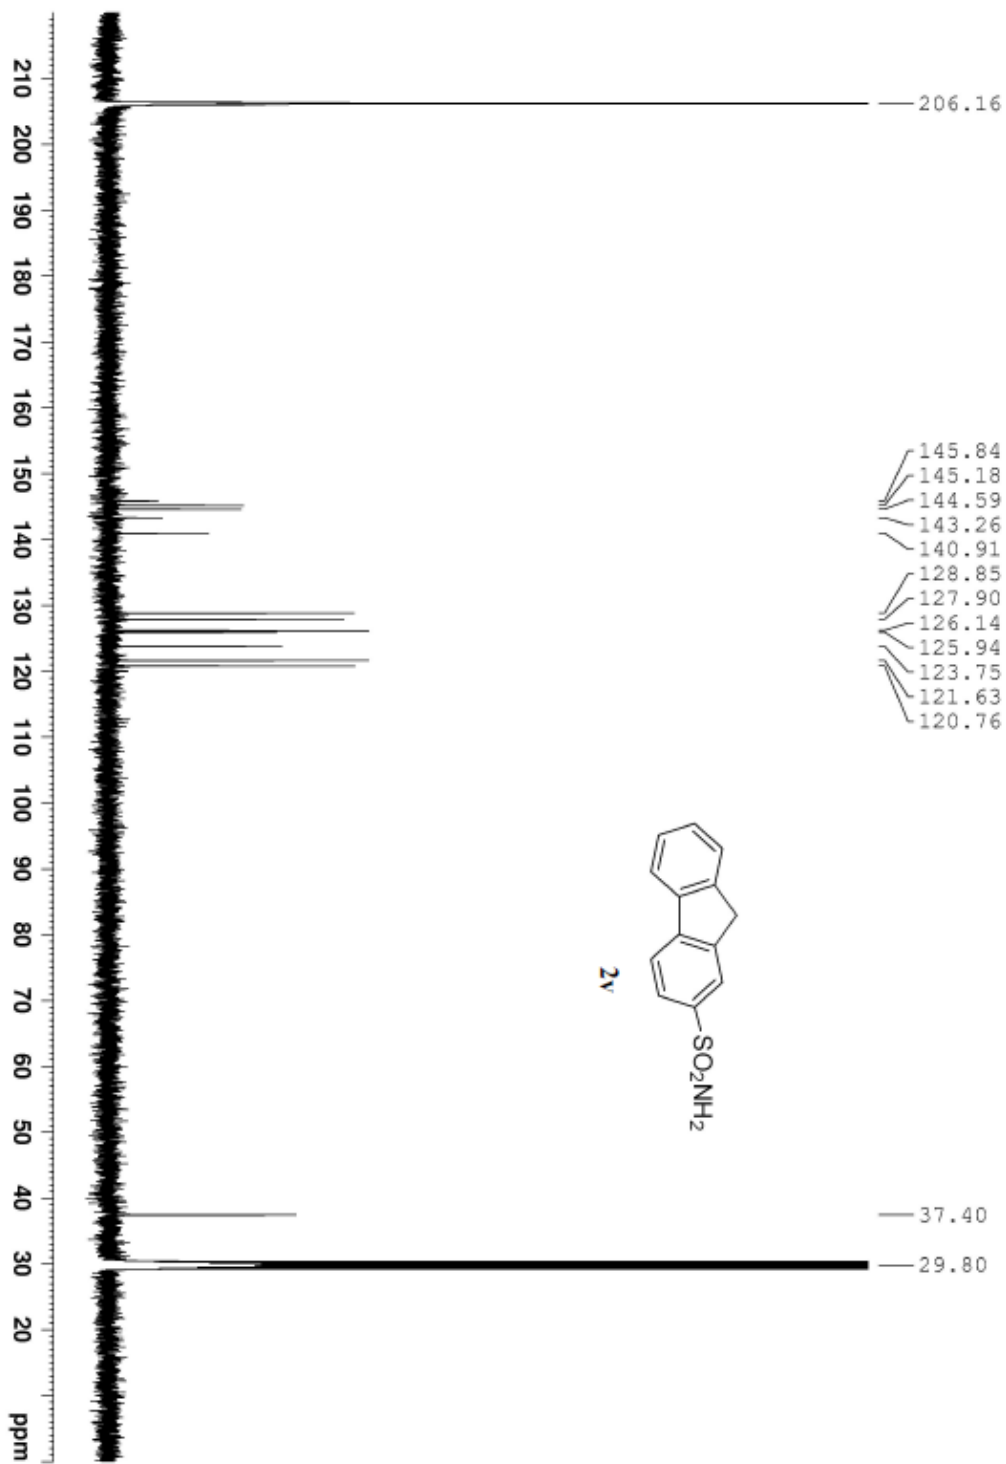

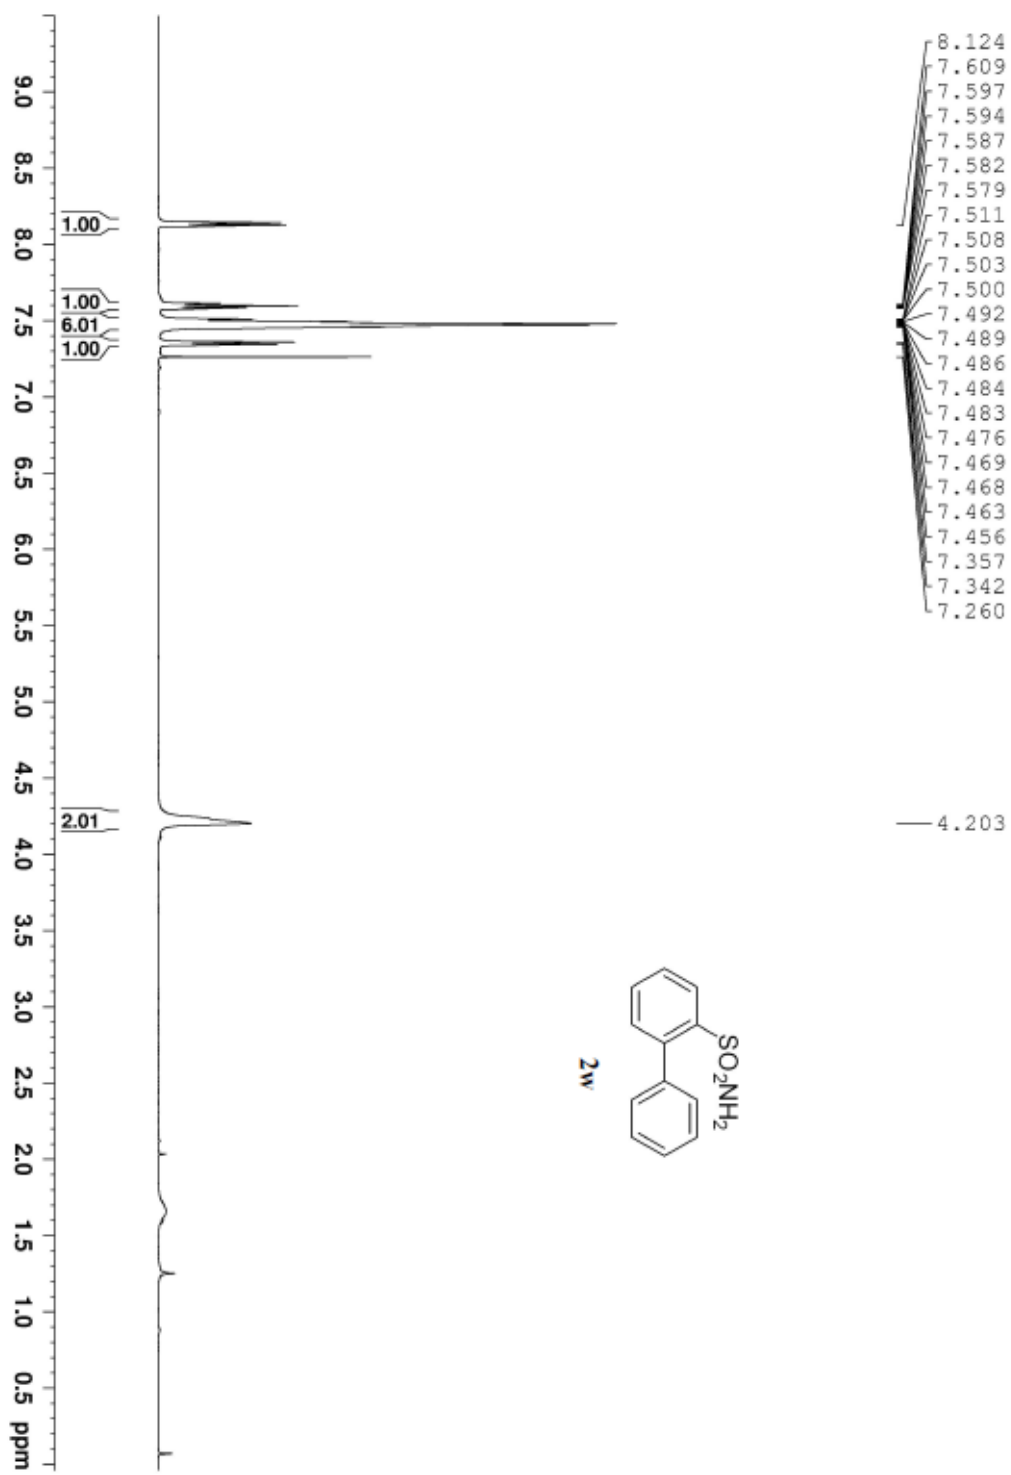



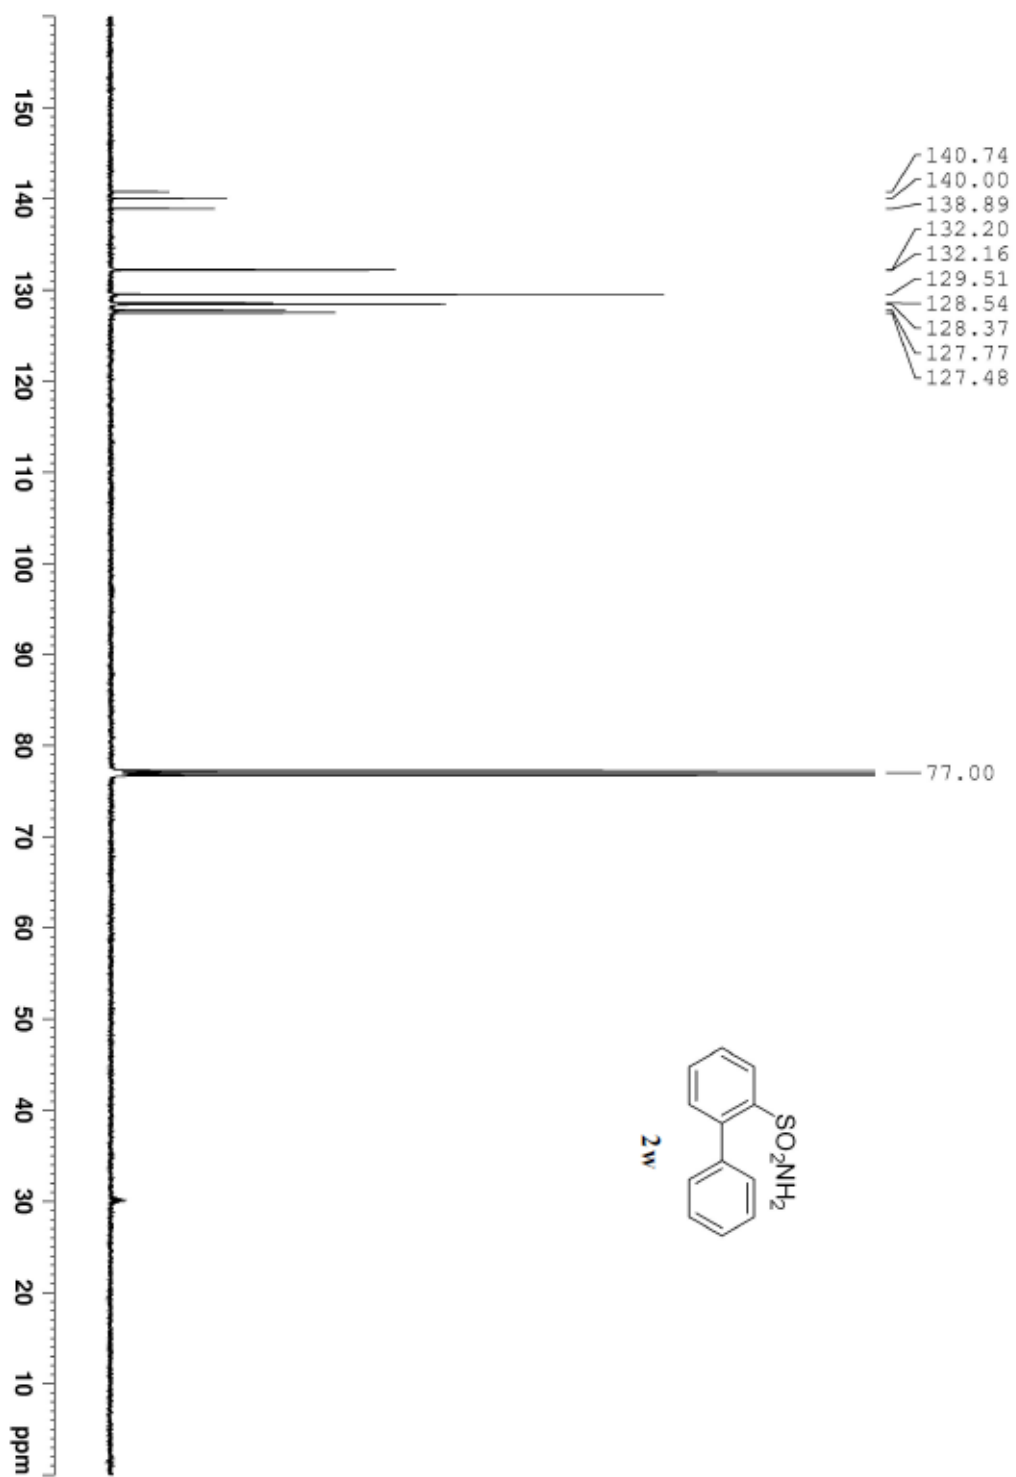

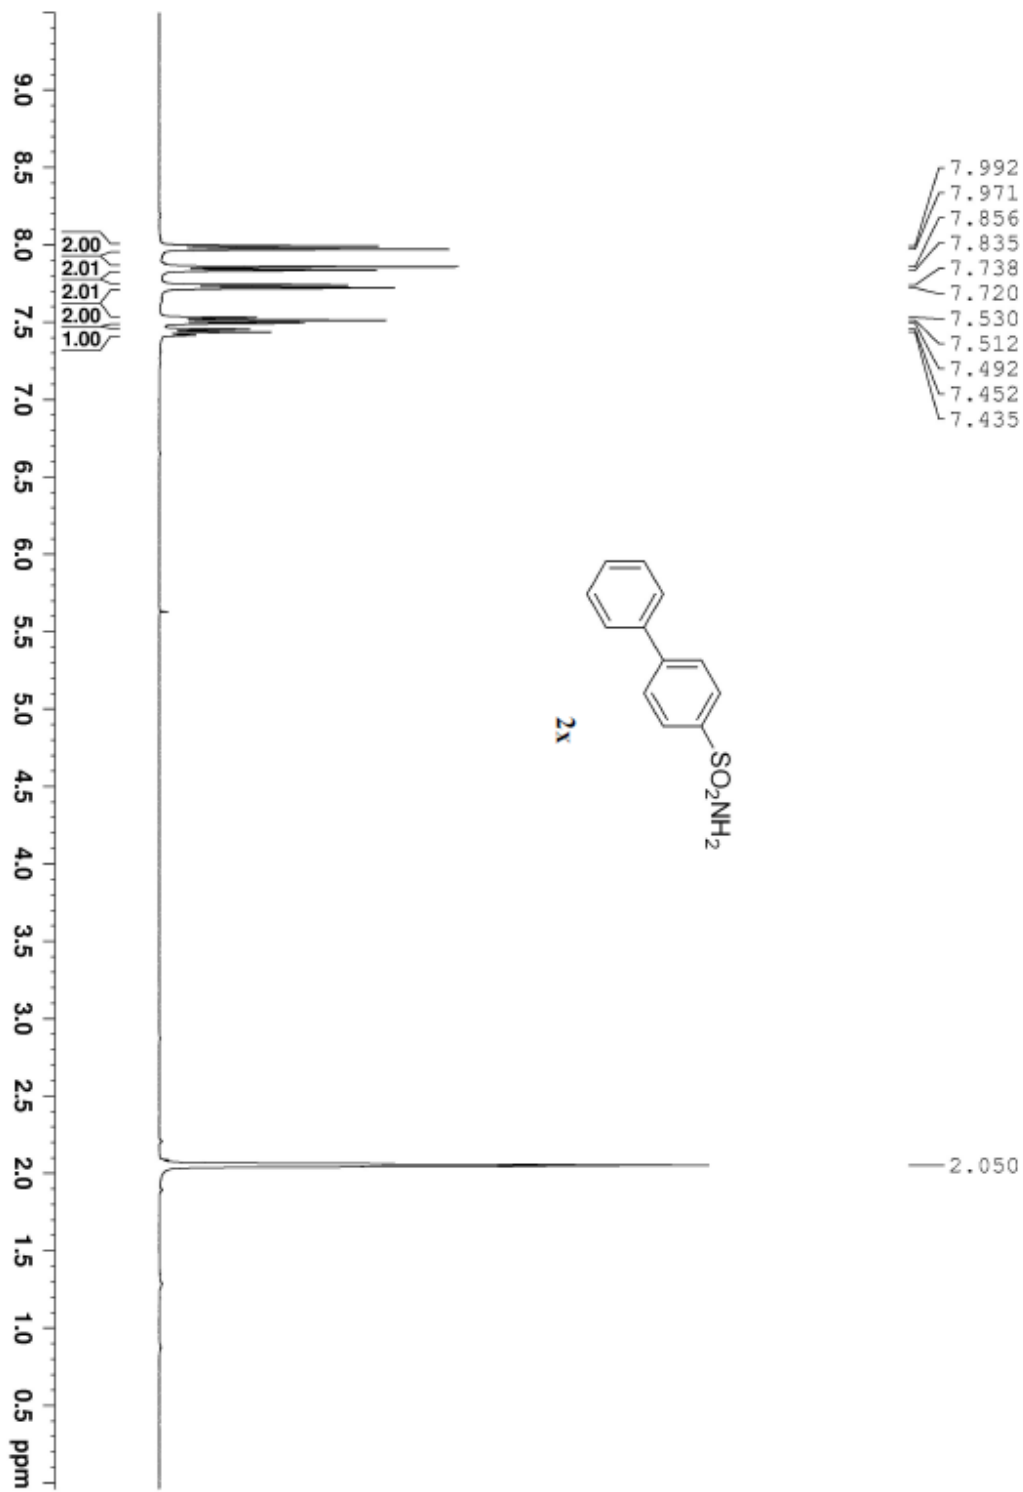

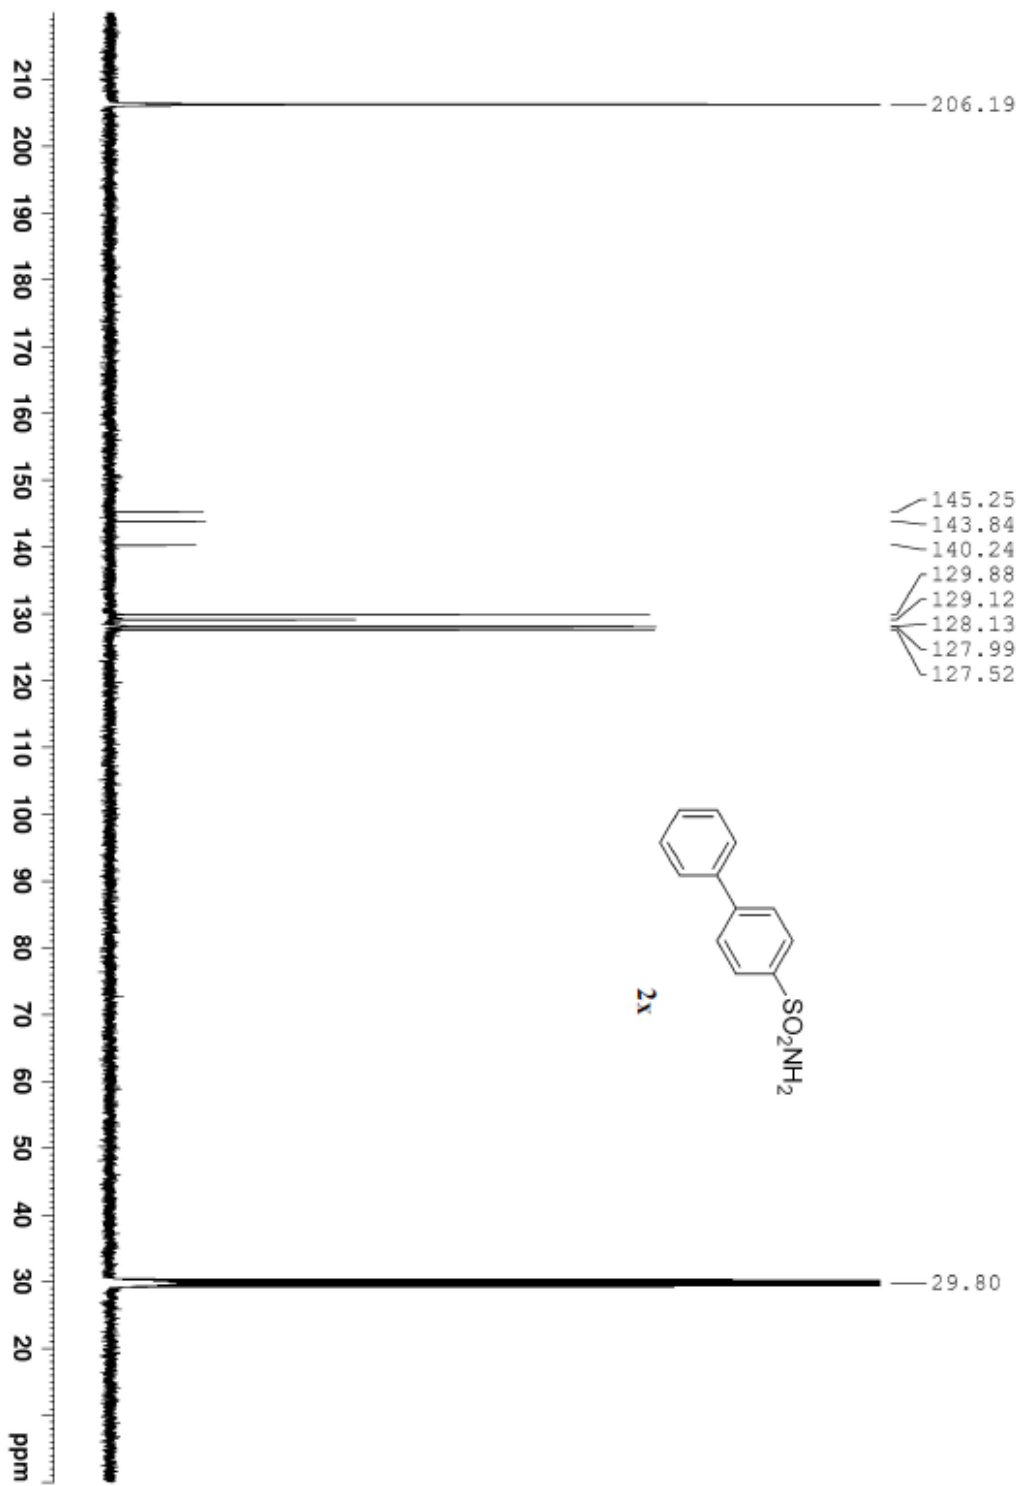

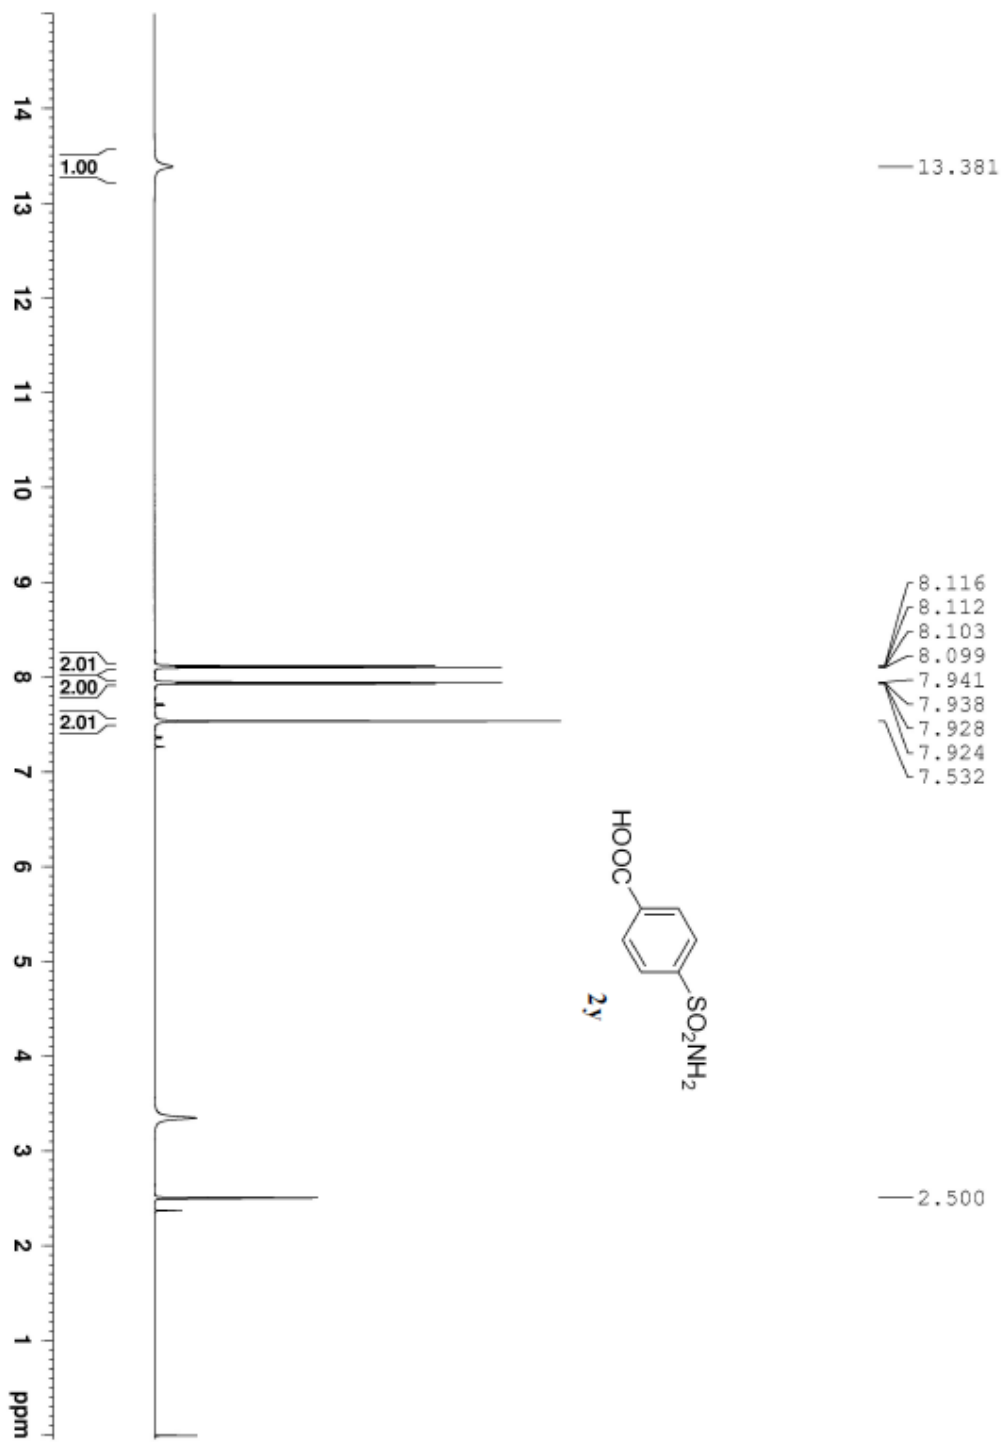

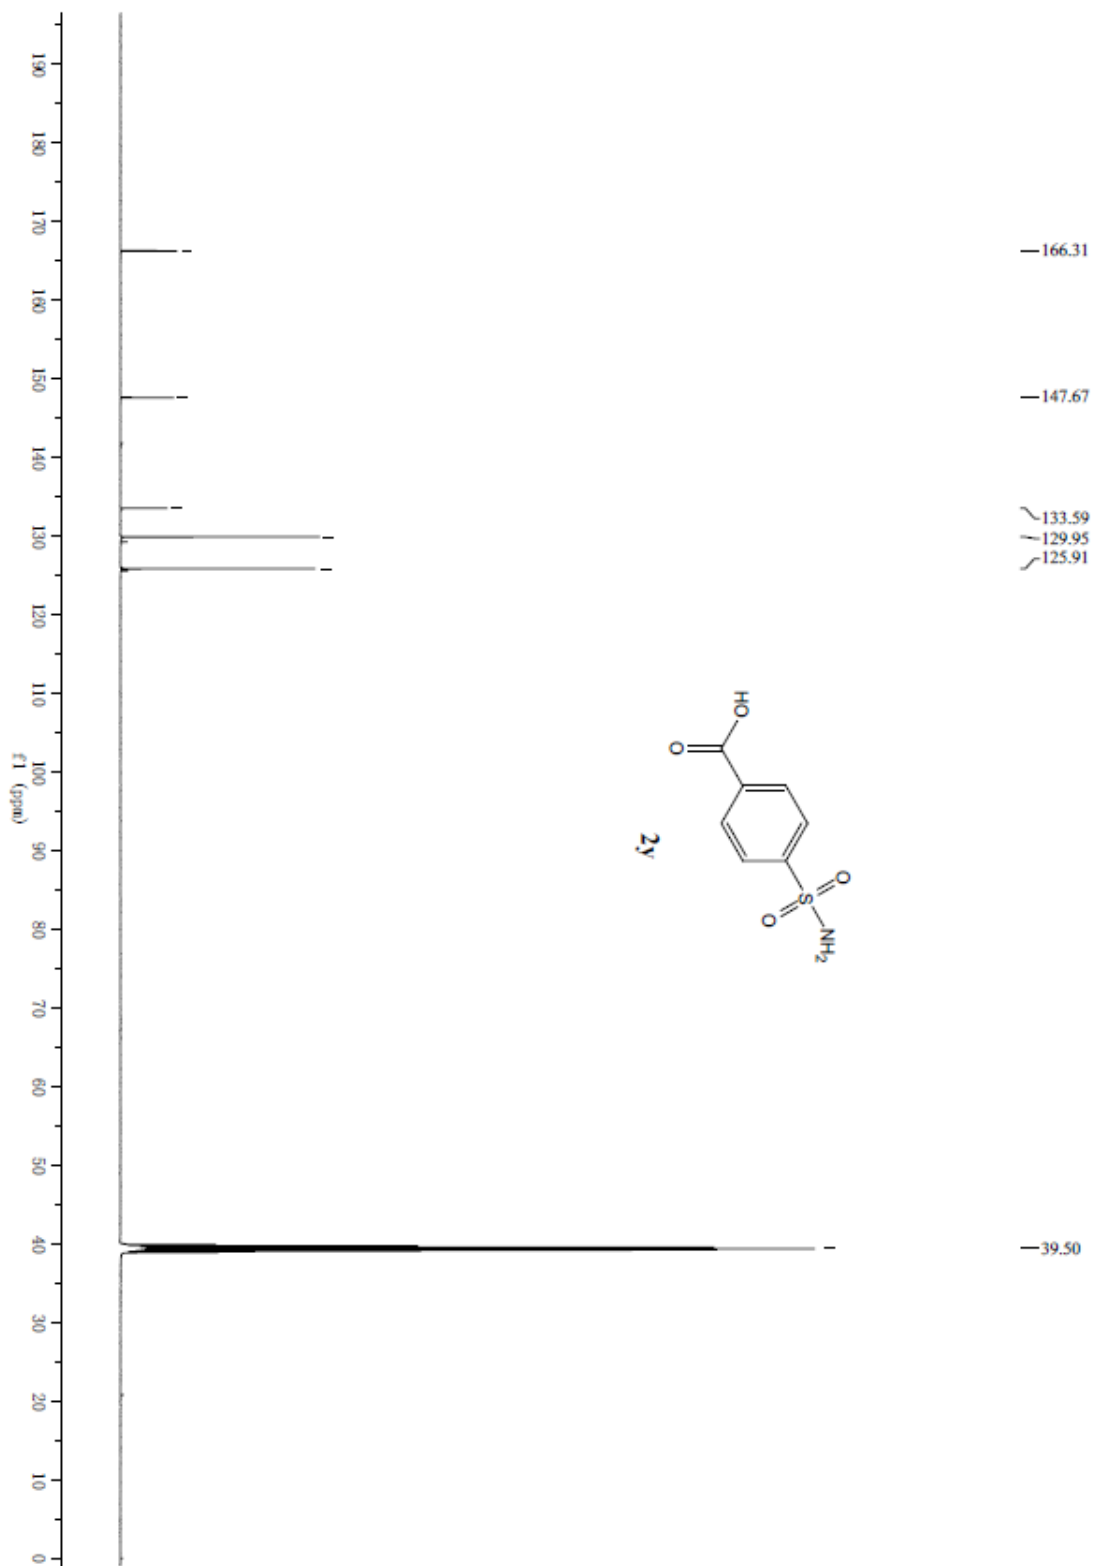

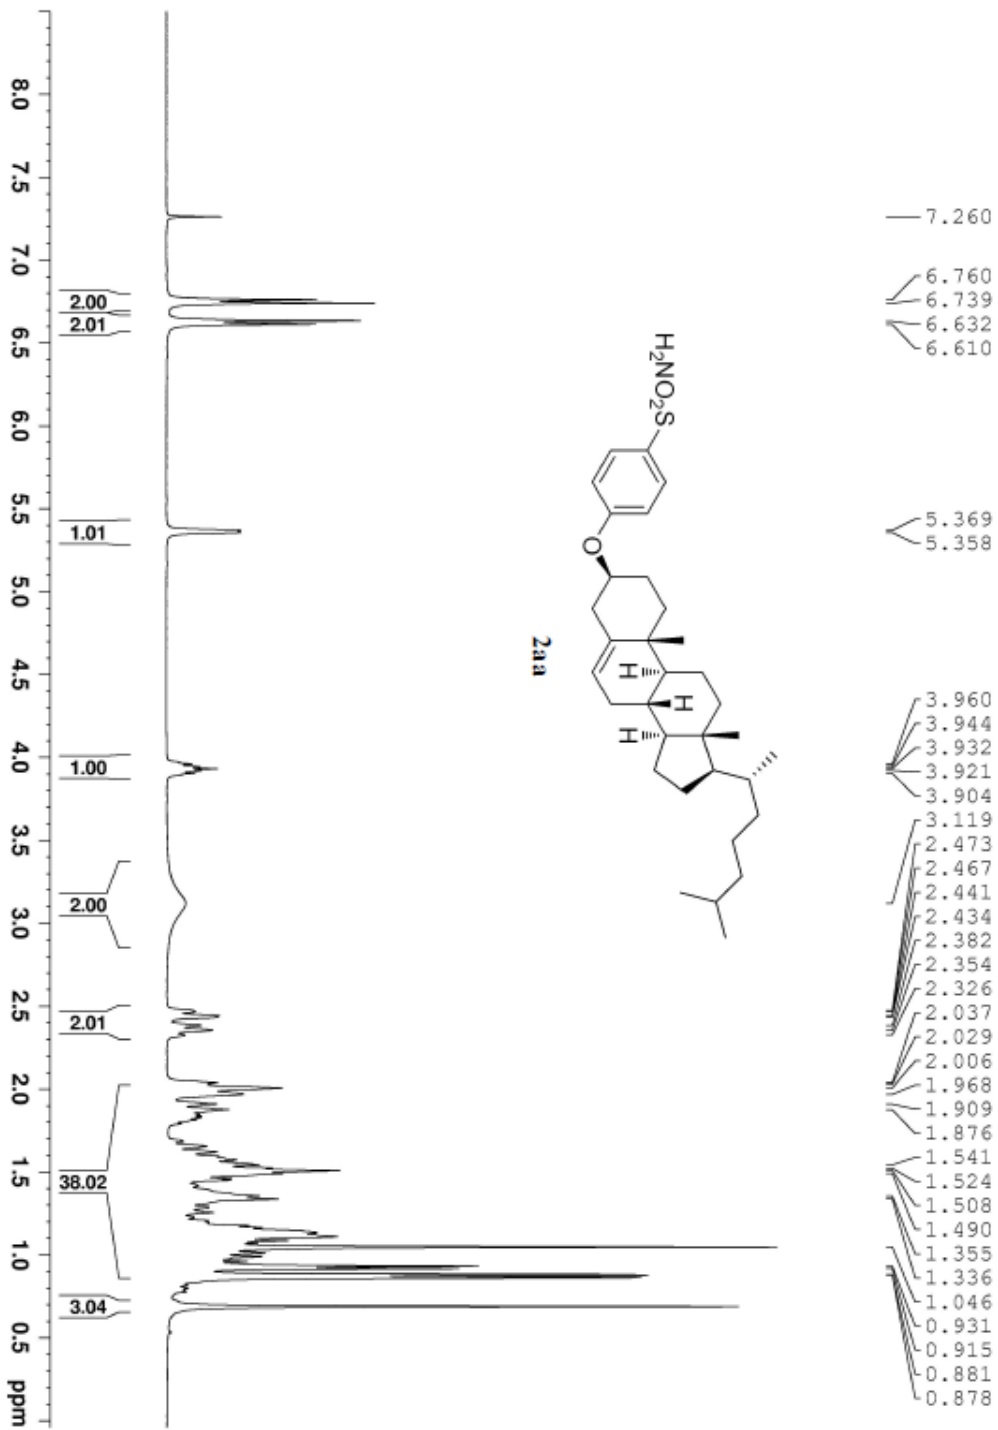

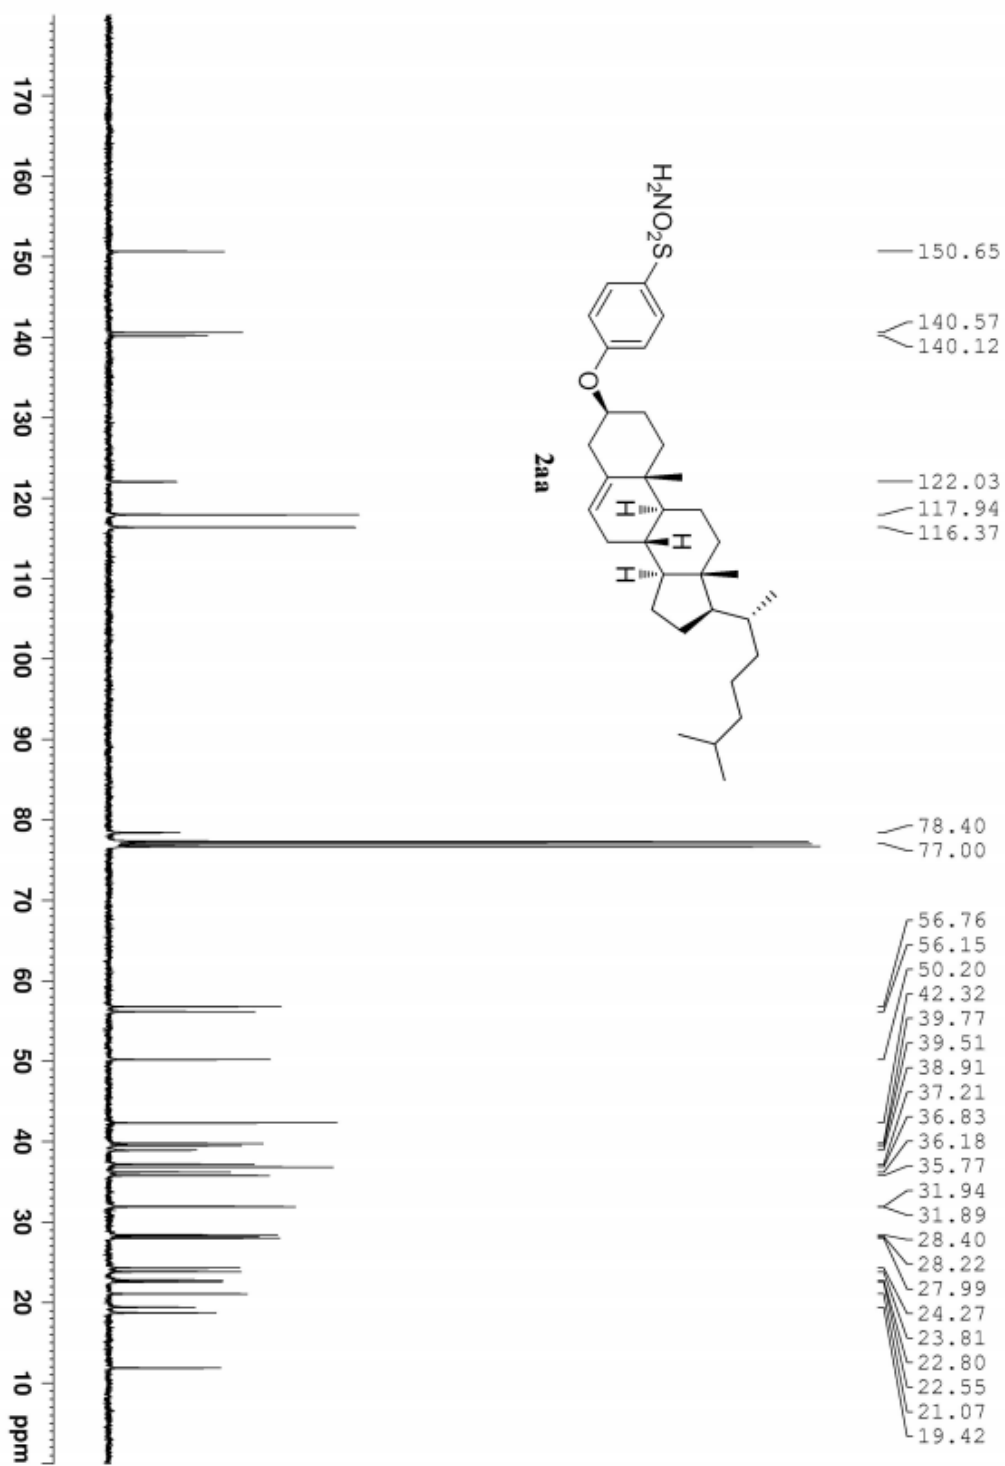

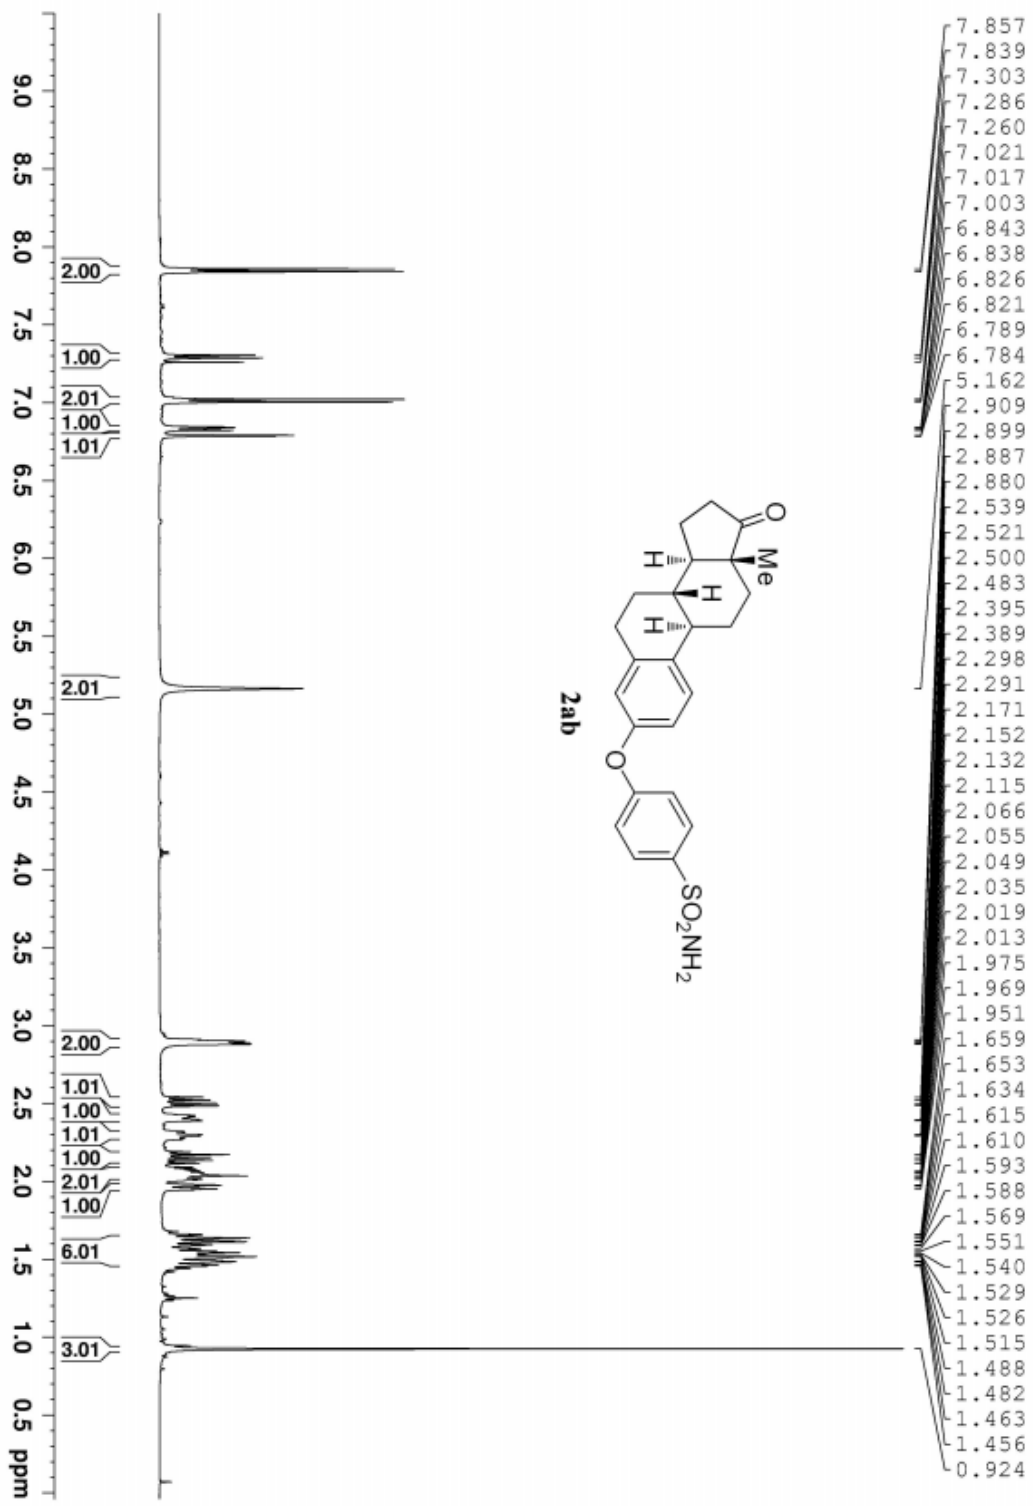



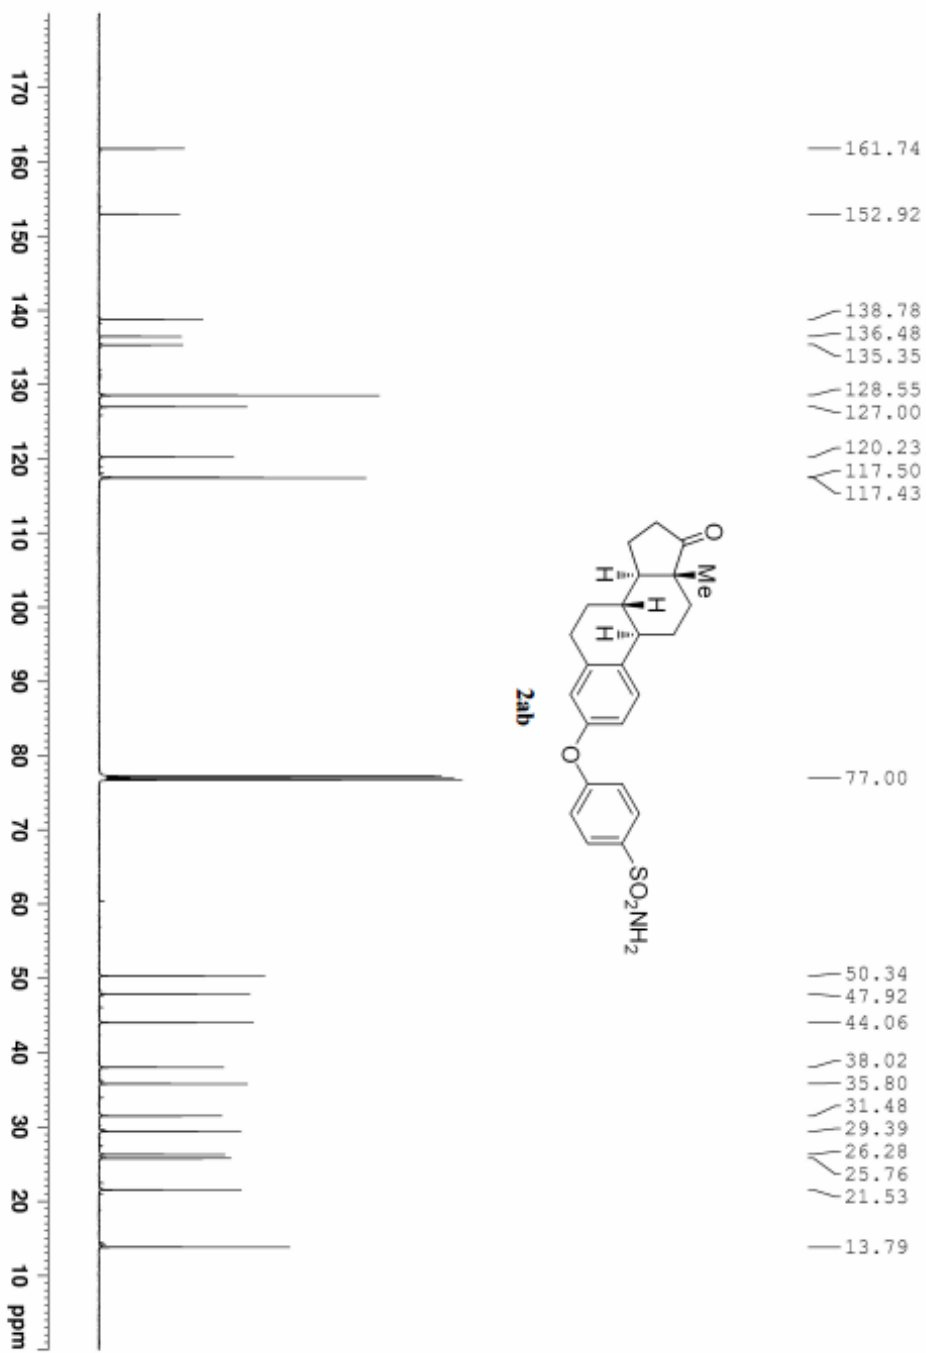

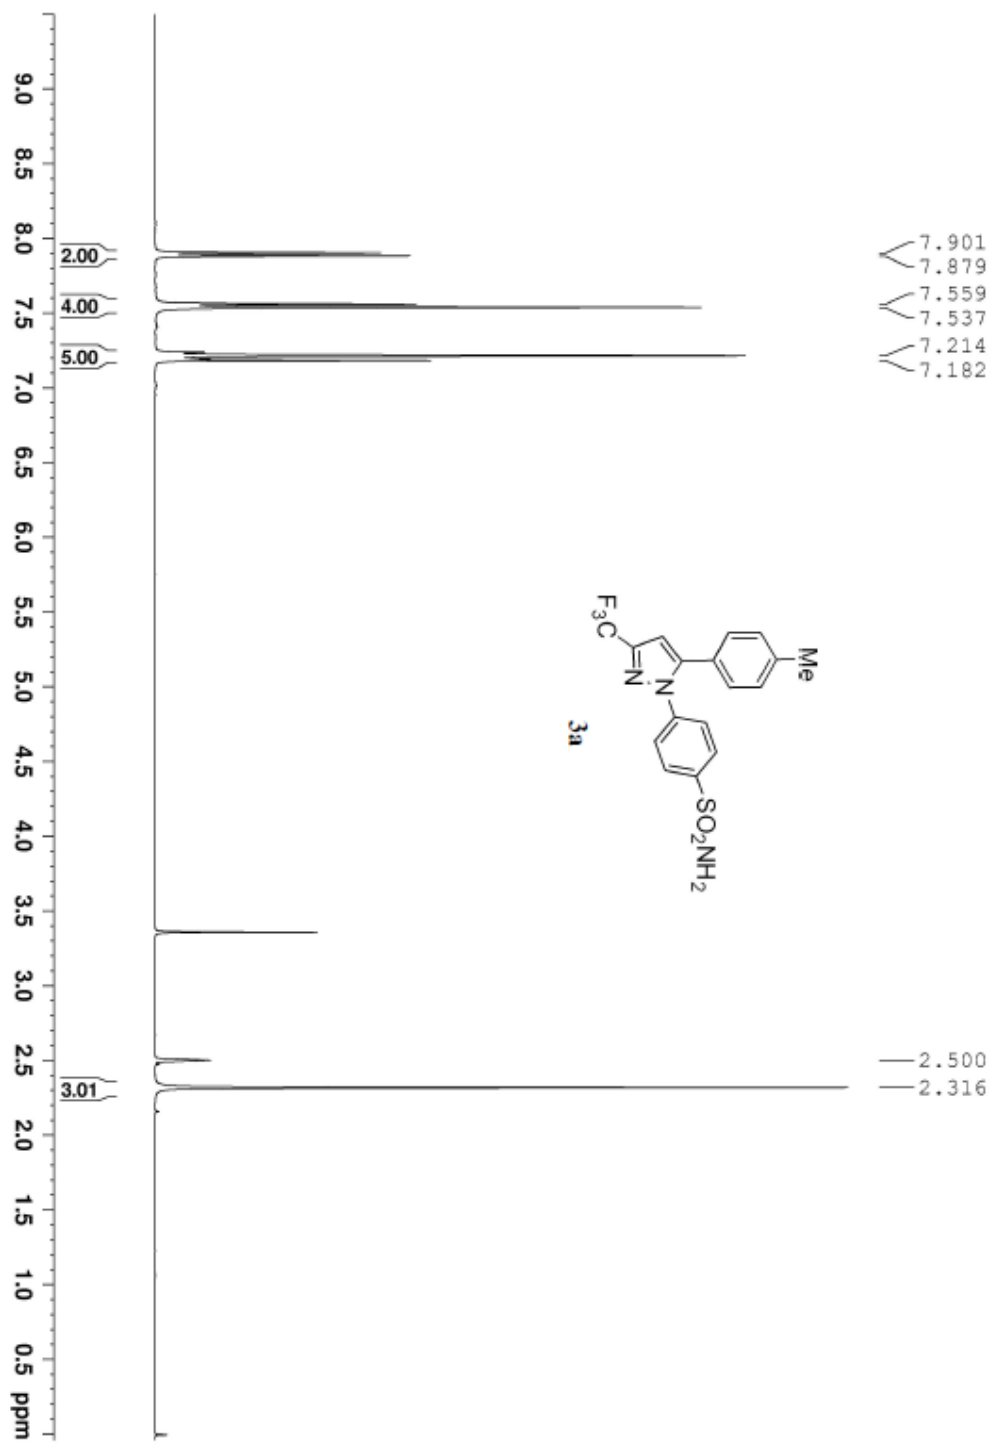

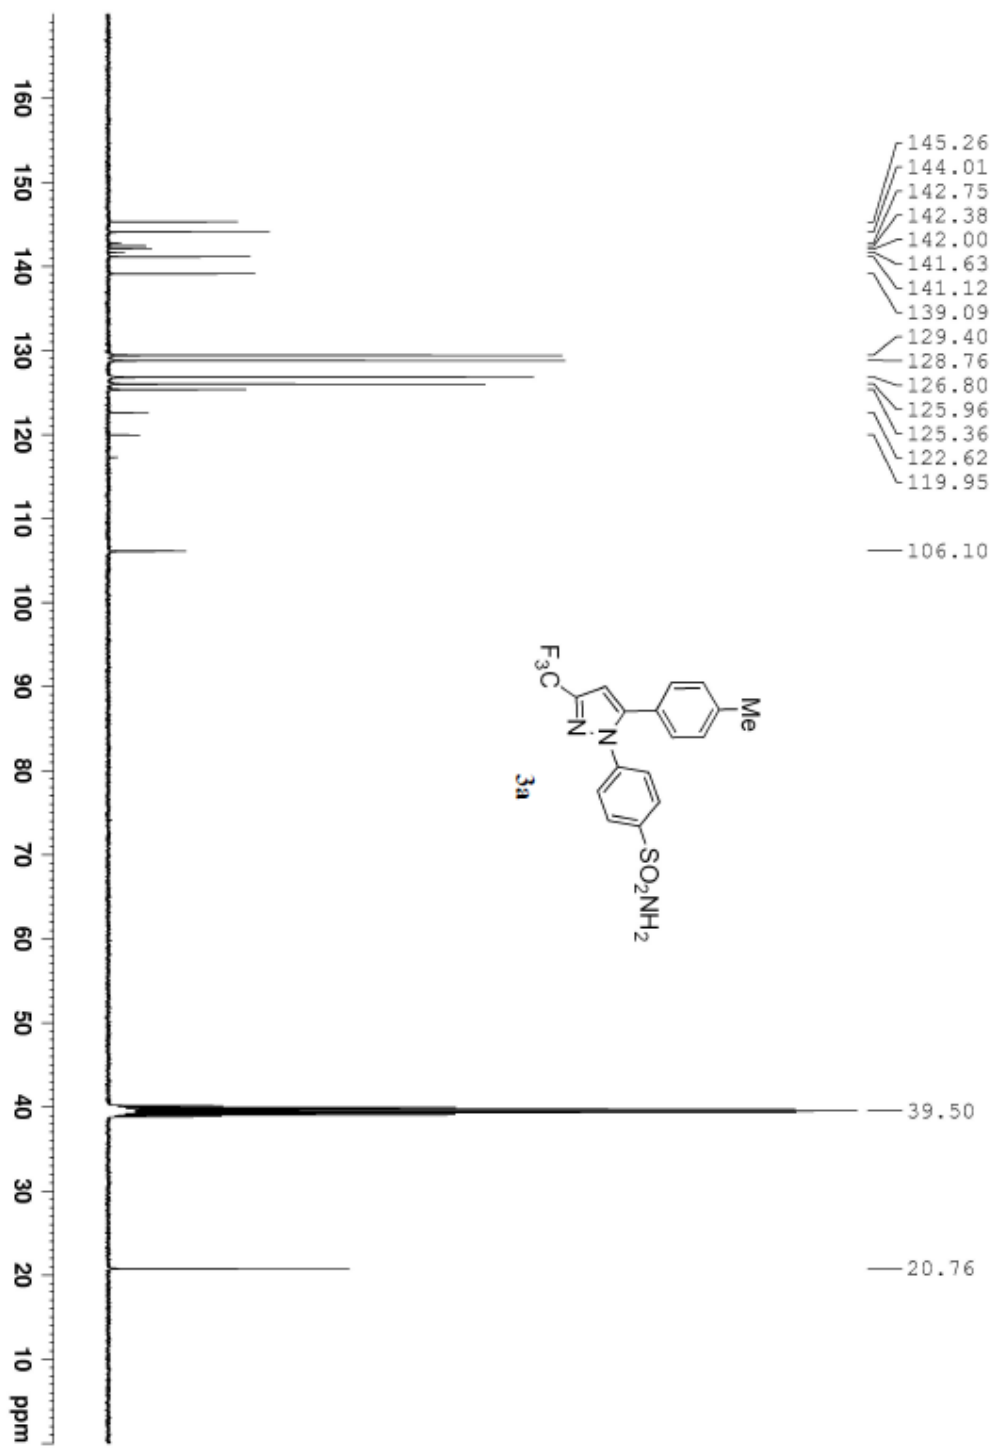

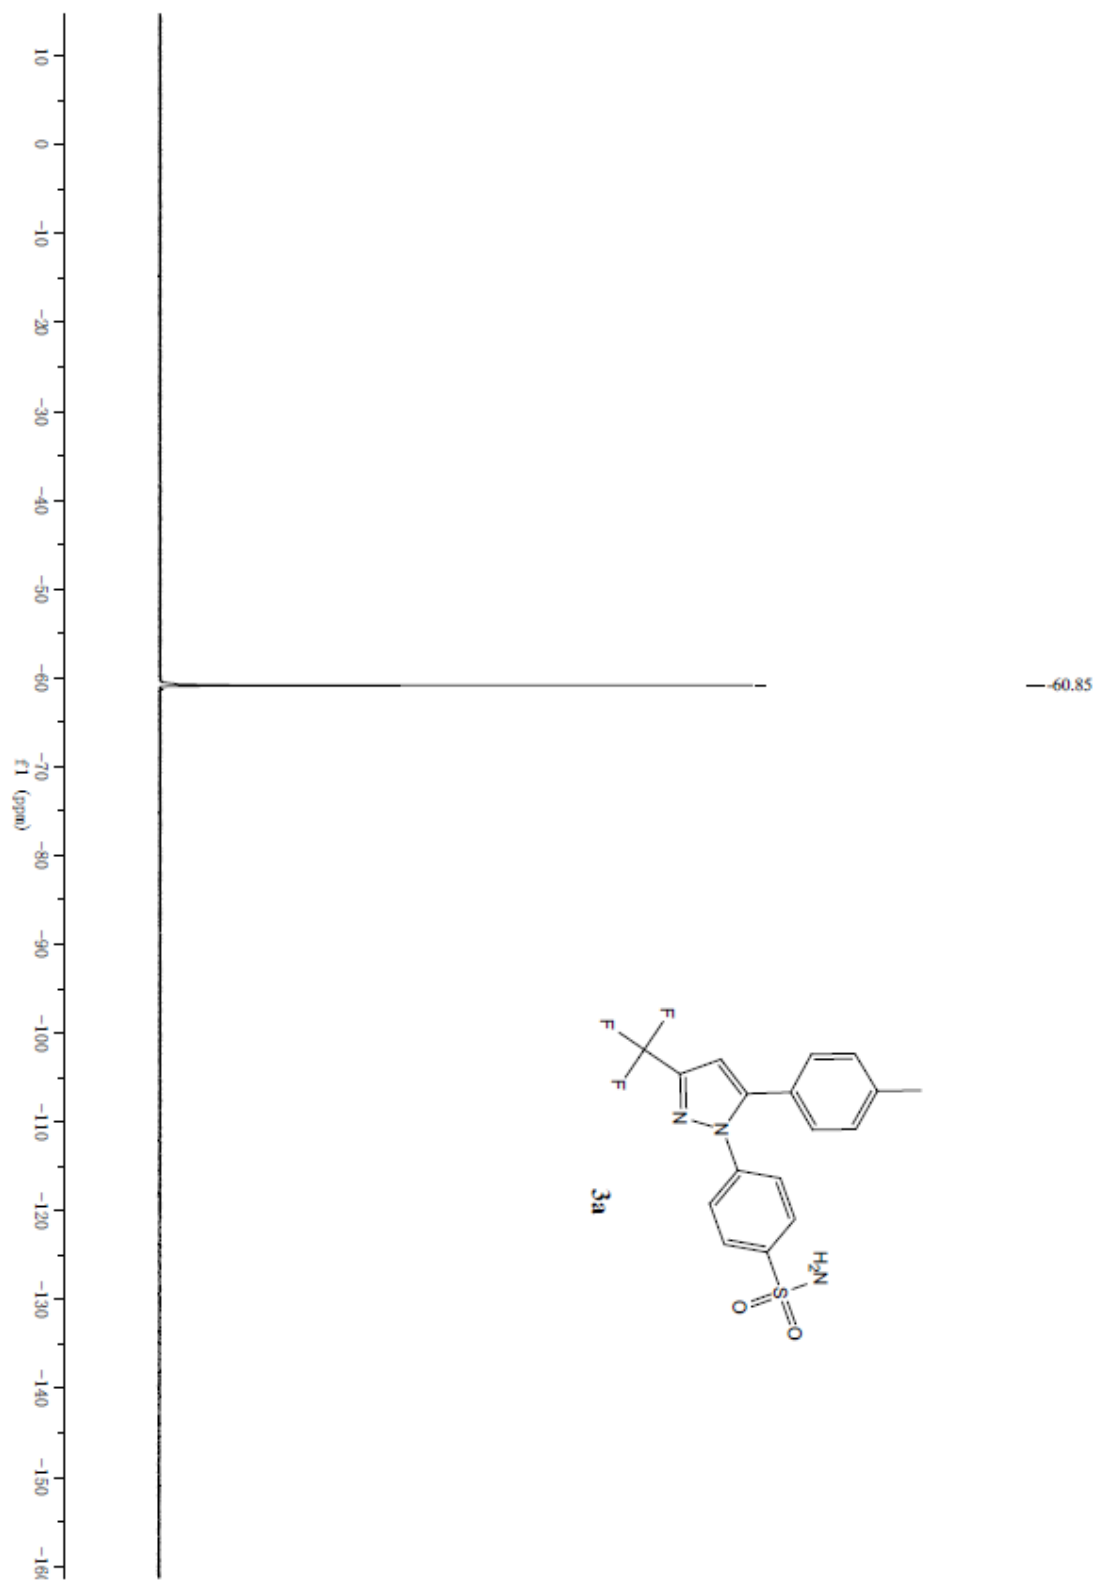

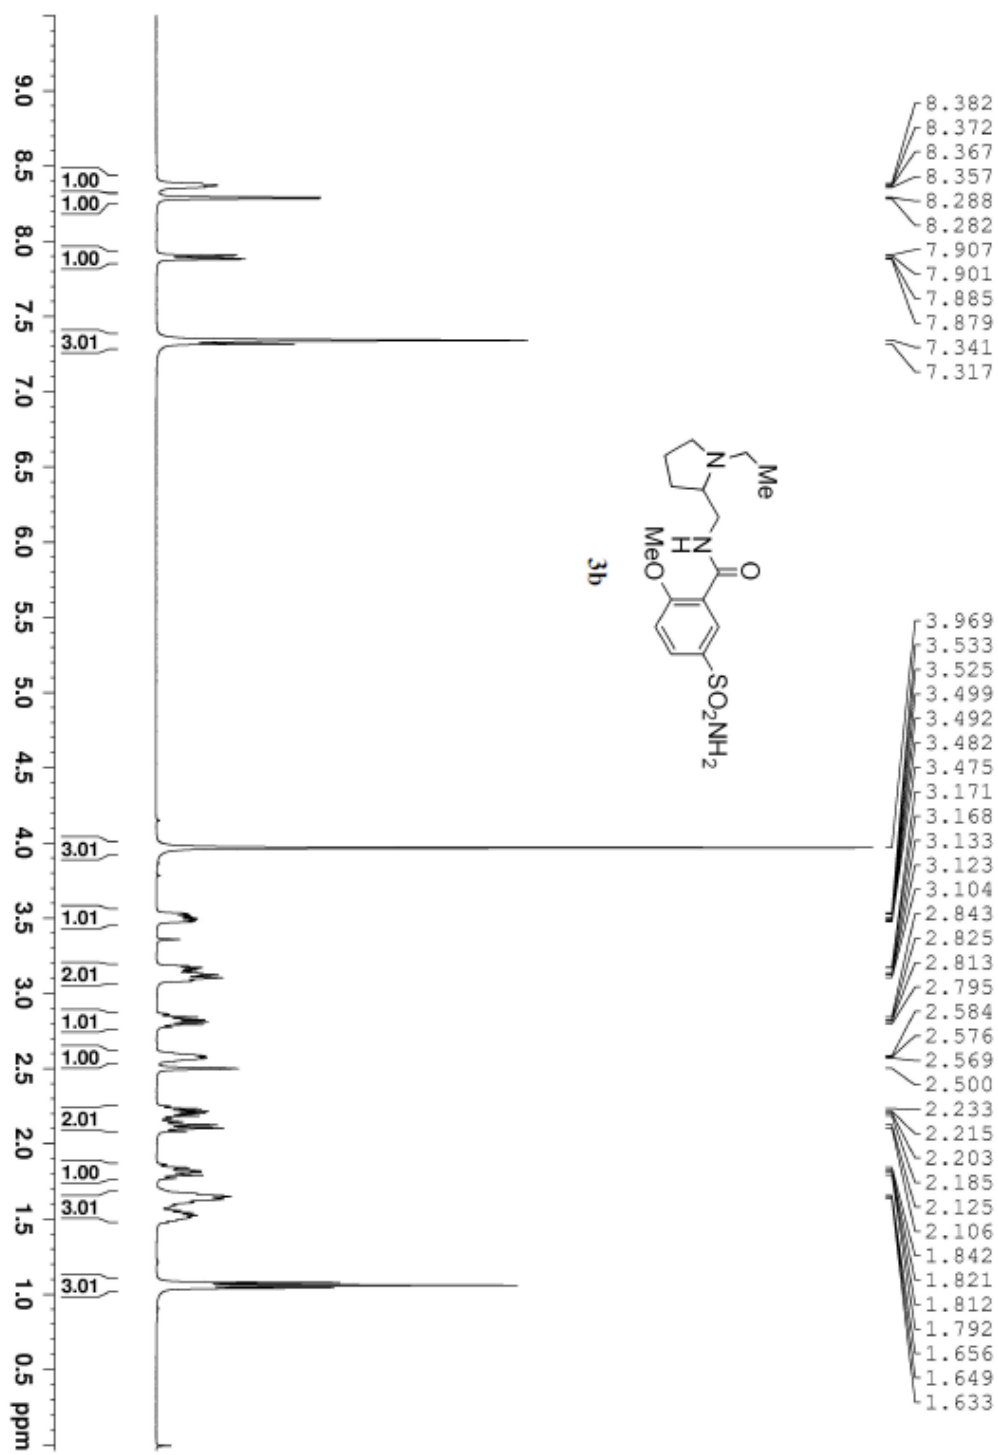

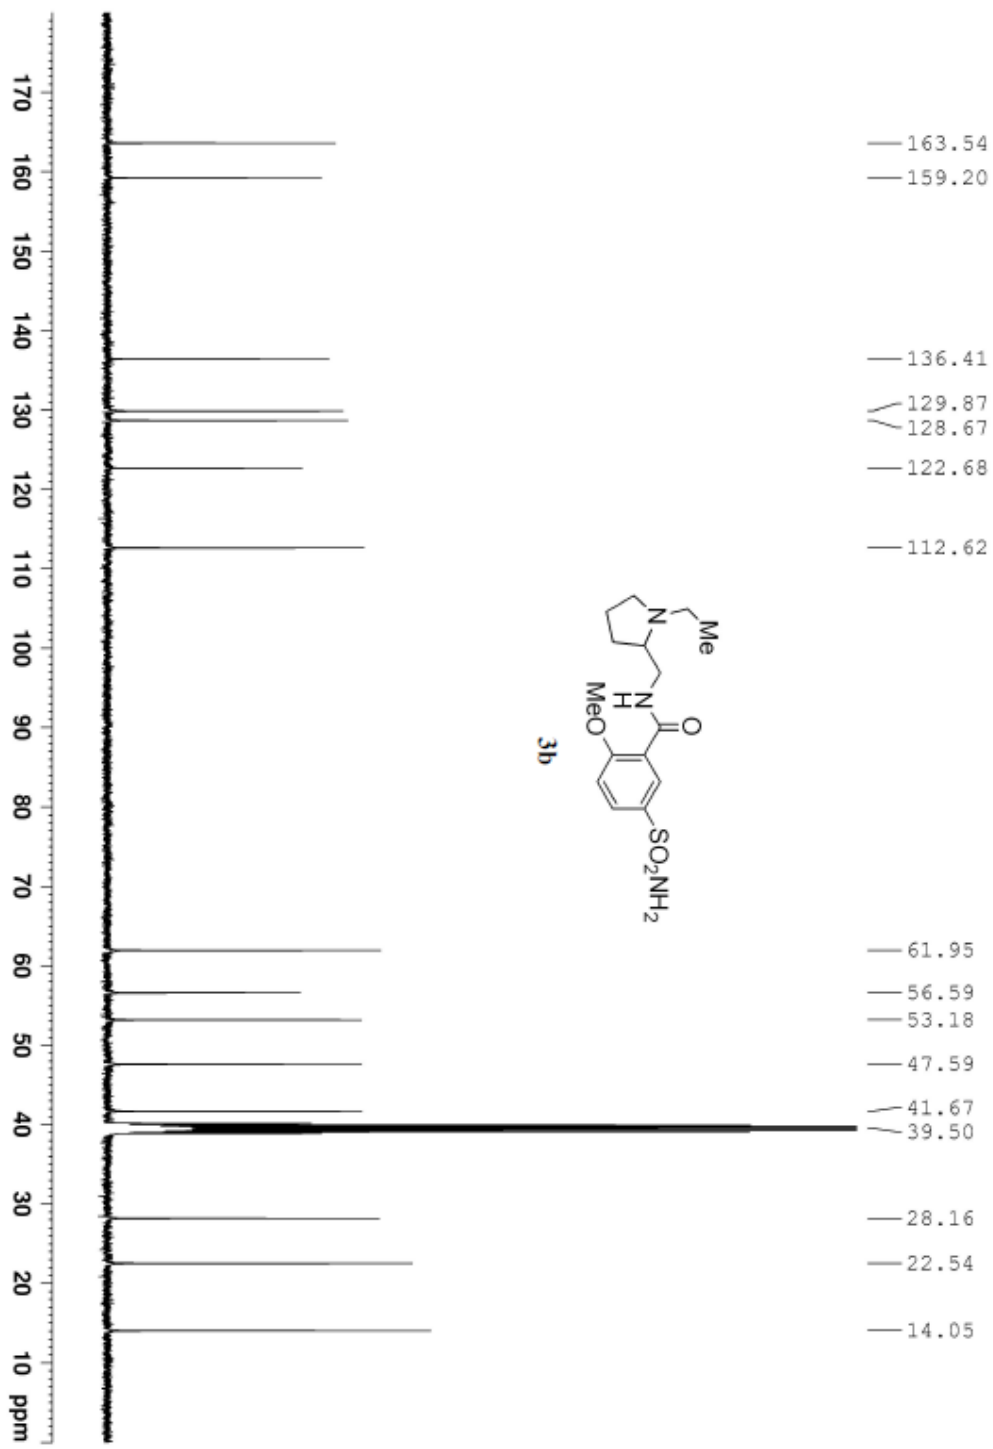

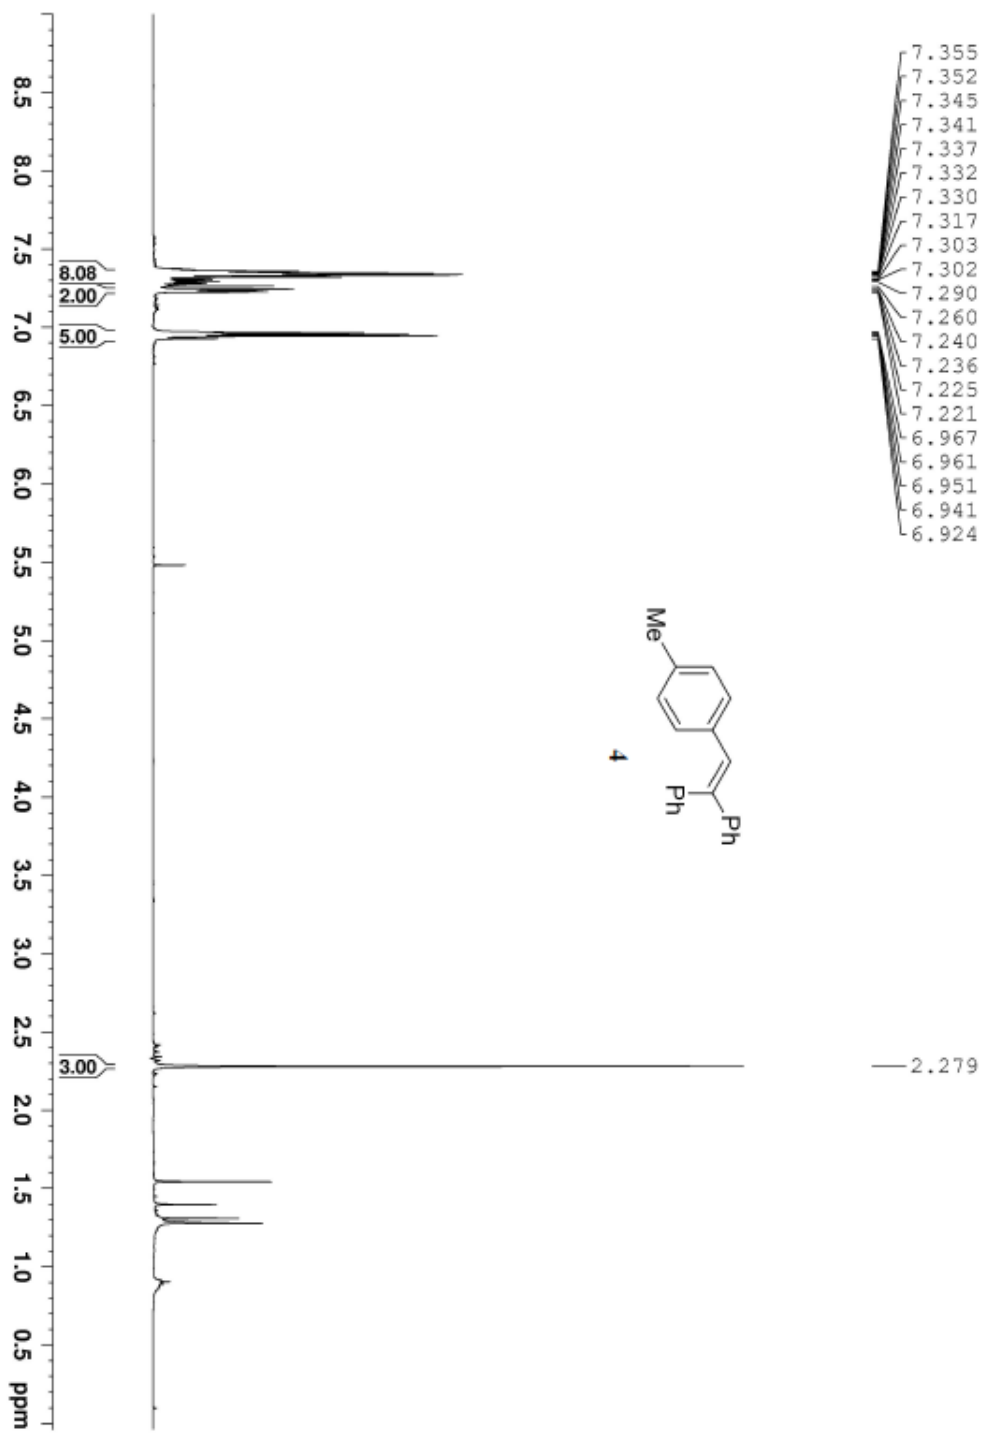

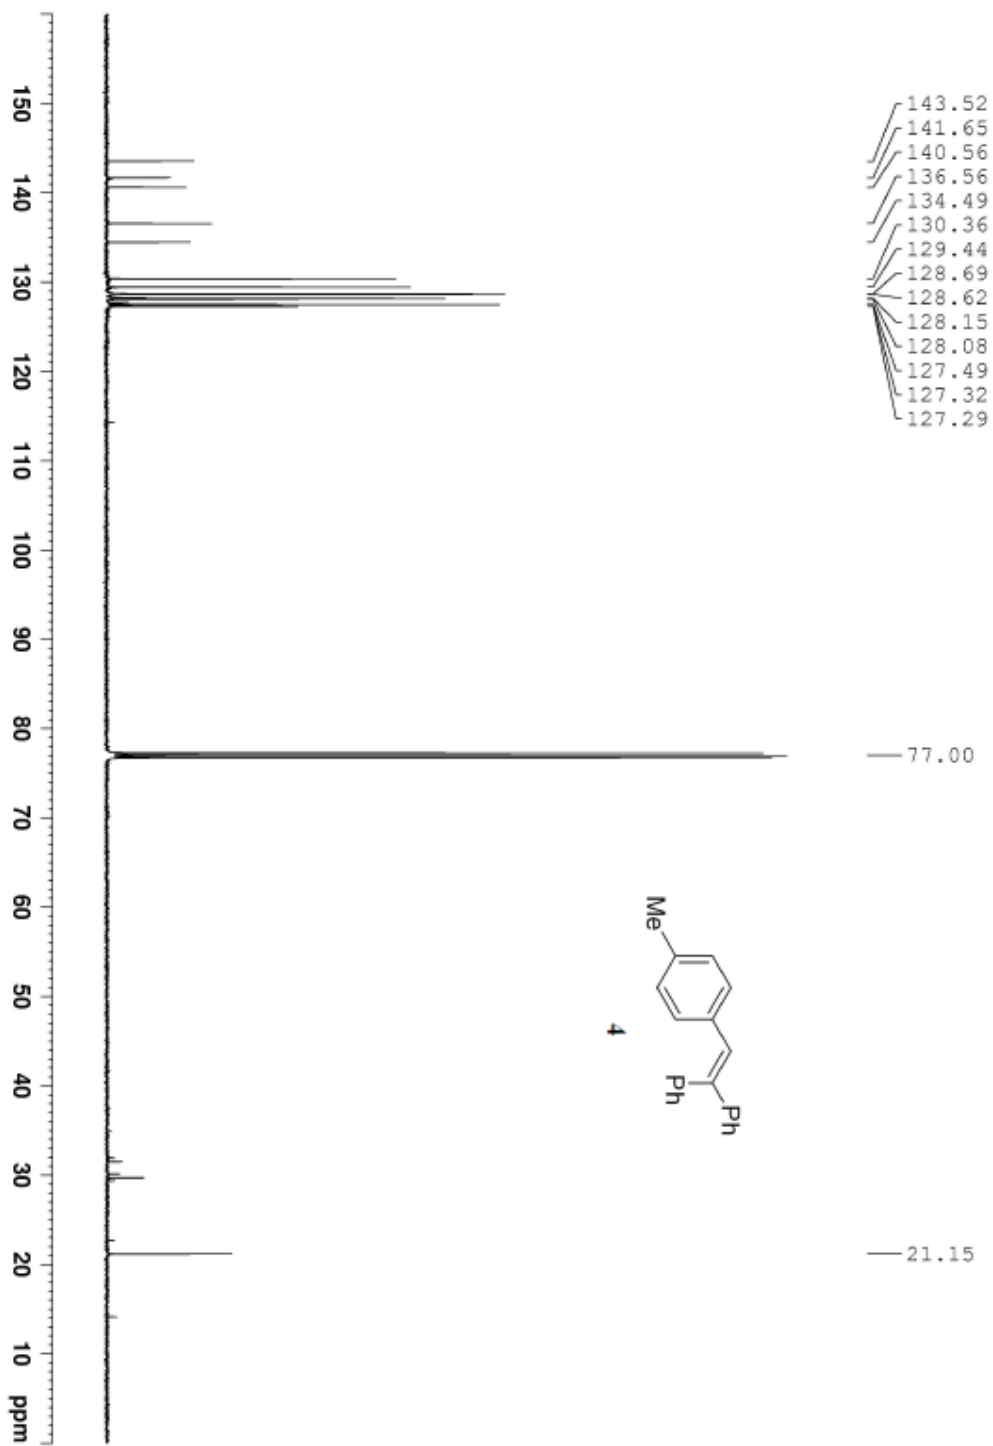



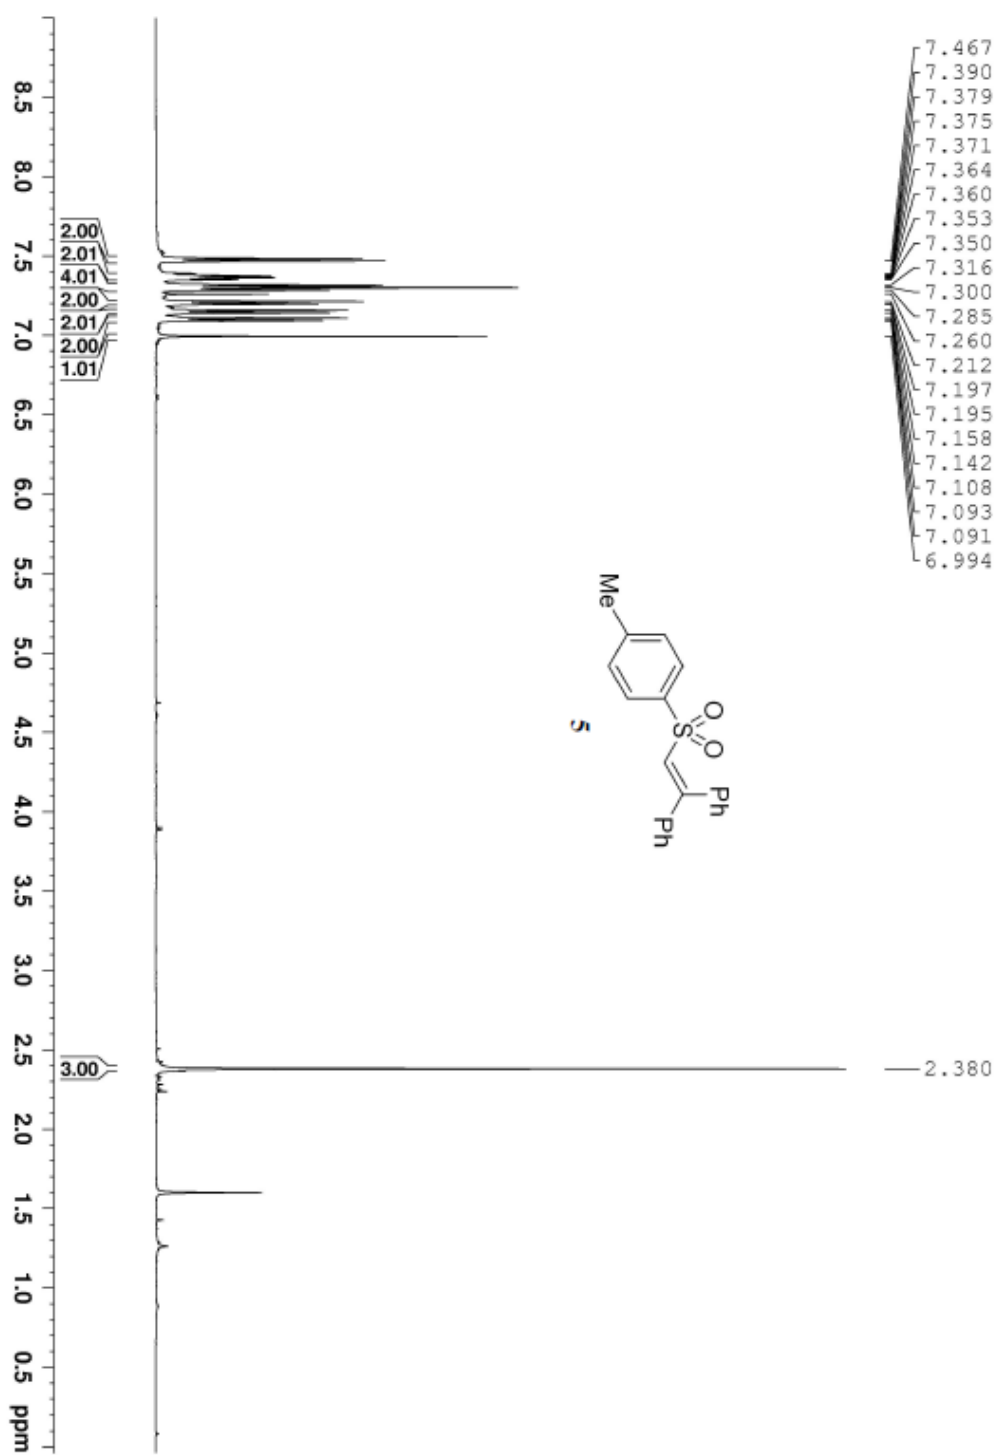

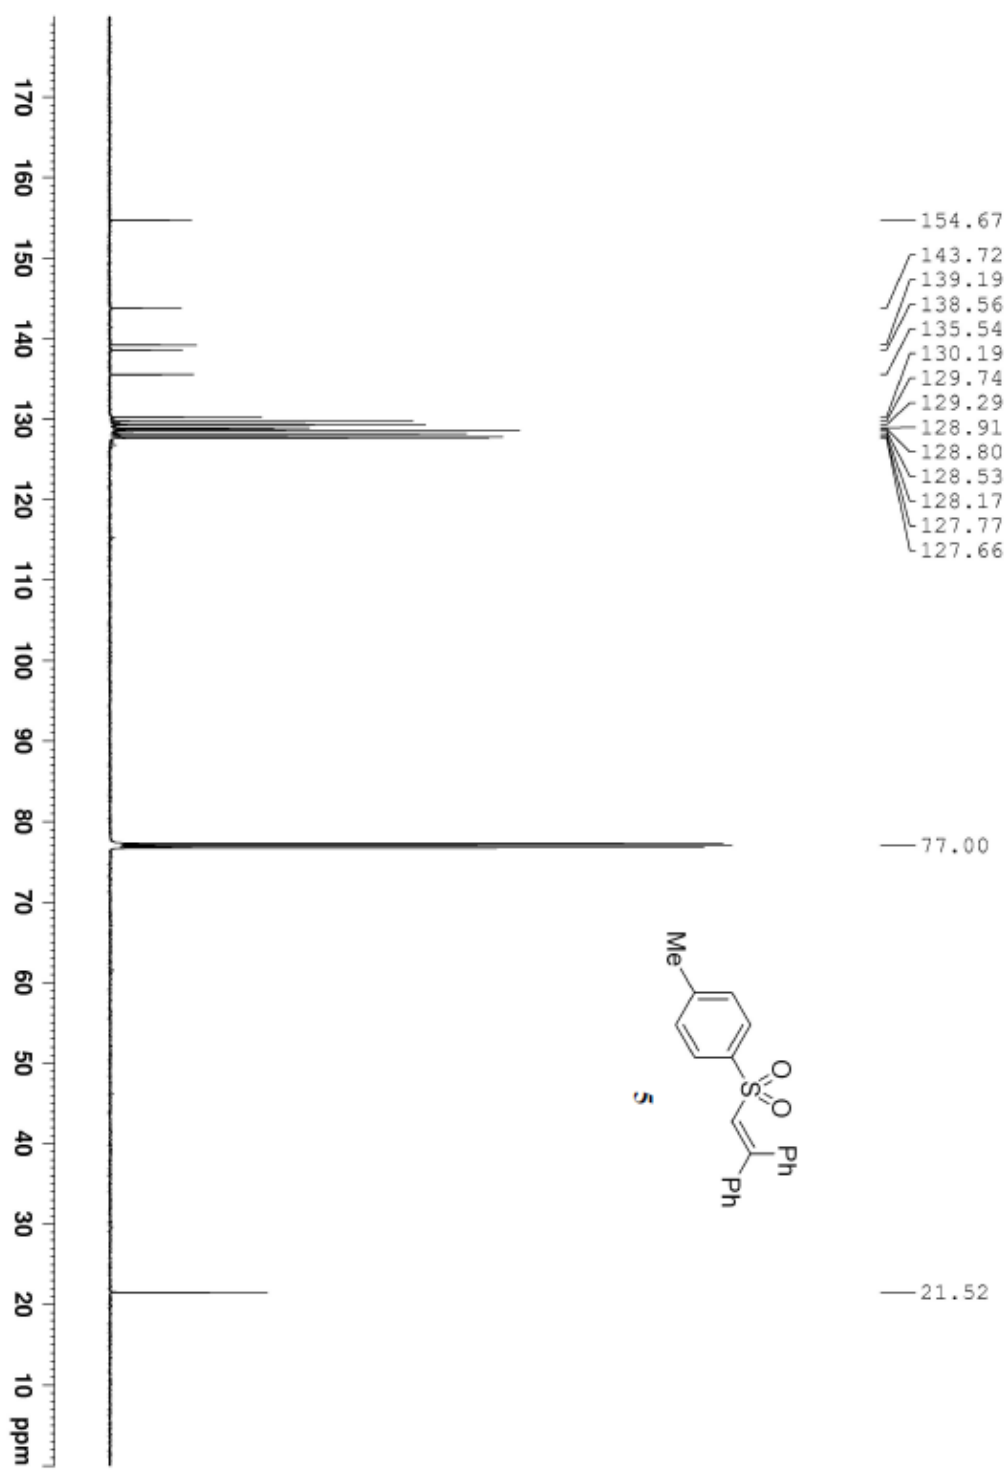

Supplement: c8gc03014f1.pdf [file c8gc03014f1.pdf]
